# Supplementary material for: The draft genome of the fast-growing non-timber forest species moso bamboo (Phyllostachys heterocycla)
Source: Springer Nature journal article supplement (doi:10.1038/ng.2569), 2013-02-24
Supplement: 41588_2013_BFng2569_MOESM20_ESM.pdf [file 41588_2013_BFng2569_MOESM20_ESM.pdf]

# The draft genome of the fast growing non-timber forest species Moso Bamboo (*Phyllostachys heterocycla*)

Zhenhua Peng<sup>1,4</sup>, Ying Lu<sup>2,4</sup>, Lubin Li<sup>1,4</sup>, Qiang Zhao<sup>2,4</sup>, Qi Feng<sup>2,4</sup>, Zhimin Gao<sup>3,4</sup>, Hengyun Lu<sup>2</sup>, Tao Hu<sup>3</sup>, Na Yao<sup>1</sup>, Kunyan Liu<sup>2</sup>, Yan Li<sup>2</sup>, Danlin Fan<sup>2</sup>, Yunli Guo<sup>2</sup>, Wenjun Li<sup>2</sup>, Yiqi Lu<sup>2</sup>, Qijun Weng<sup>2</sup>, Congcong Zhou<sup>2</sup>, Lei Zhang<sup>2</sup>, Tao Huang<sup>2</sup>, Yan Zhao<sup>2</sup>, Chuanrang Zhu<sup>2</sup>, Xinge Liu<sup>3</sup>, Xuewen Yang<sup>3</sup>, Tao Wang<sup>1</sup>, Kun Miao<sup>1</sup>, Caiyun Zhuang<sup>1</sup>, Xiaolu Cao<sup>1</sup>, Wenli Tang<sup>3</sup>, Guanshui Liu<sup>3</sup>, Yingli Liu<sup>3</sup>, Jie Chen<sup>1</sup>, Zhenjing Liu<sup>1</sup>, Licai Yuan<sup>3</sup>, Zhenhua Liu<sup>1</sup>, Xuehui Huang<sup>2</sup>, Tingting Lu<sup>2</sup>, Benhua Fei<sup>3</sup>, Zemin Ning<sup>2</sup>, Bin Han<sup>2\*</sup> & Zehui Jiang<sup>1,3\*</sup>

<sup>1</sup>Research Institute of Forestry, Chinese Academy of Forestry, Key Laboratory of Tree Breeding and Cultivation, State Forestry Administration, Beijing 100091, China.

<sup>2</sup>National Center for Gene Research, Shanghai Institute of Plant Physiology and Ecology, Shanghai Institutes for Biological Sciences, Chinese Academy of Sciences, 500 Caobao Road, Shanghai 200233, China.

<sup>3</sup>International Center for Bamboo and Rattan, 8 Fu Tong Dong Da Jie, Chaoyang District, Beijing 100102, China.

<sup>4</sup>These authors contributed equally to this work.

\*Correspondence should be addressed to B.H. (bhan@ncgr.ac.cn); Z.J. (jiangzehui@icbr.ac.cn).

## **Supplementary Notes**

### **Bamboo and the individual subjected to genome sequencing.**

Bamboo is the general name of plants which belong to a Bambusoideae in Gramineae family, about 1,250 species and 90 genera widely distributed in the tropical and subtropical areas of Asia, Africa, America, and Pacific islands, and a few in the temperate and frigid zone<sup>1</sup>.

According to the statistics, there are about 500 species of bamboo and totally 53,800 km<sup>2</sup> of bamboo forest in China, the largest cultivation area and the maximum gross output value of bamboo industry in the world. The export volume of bamboo products was US\$ 14 billion in 2009 and the gross output value of bamboo industry was about US\$ 130 billion in 2010. Bamboo is one of the most important non-timber forest resources and forest products in terms of their ecological conservation, feasible economic profit and social benefit, increasingly playing an important role in increasing farmer income and promoting local economic development. Fast growing, high productivity, strongly regeneration capability and various benefits of bamboo attracted attention in countries, where it was a sustainable material to supply works of the planting and industry to billions of people.

Moso bamboo is a large woody bamboo with the highest ecological, economic, and cultural values of all bamboos in Asia and accounting for ~70% of total area of bamboo growth and 5 billion US dollars of annual forest production in China<sup>1</sup>. The moso bamboo is one of the plants with an incredible growth speed in the world. The height growth of its shoot is rapid and steady in suitable condition in spring depended on its strong rhizome-dependent system. At the growth peak, the shoot of the moso Bamboo can grow as long as 100-cm within 24 hours, and reach to its maximum height about 20 meters in shortly 45 to 60 days. It grows predominantly by vegetative propagation due to its unique rhizome-dependent system. Bamboo has a very term flowering interval as long as 60 to 120 years. All of these mysteries

attracted our interest in its biological research.

The moso bamboo genome contains 24 pairs of chromosomes, as well as basic number of chromosomes characters in other bamboos. Prior to the whole genome sequencing, we checked different moso bamboo communities growing in main planting areas, crossing Eastern, Southeastern, and Southern China. We finally chose the individual growing in the Tianmu-Mountain National Nature Reserve in Zhejiang Province of Eastern China (119°26'55.0"E, 30°19'13.4"N; 480-meter in elevation) where its growth had not been interrupted by human activities for a long time.

### **The tissues for the transcriptome sequencing.**

Five vegetative tissues (young leaves, rhizome, root, tip of the 20cm-high shoot, and tip of the 50cm-high shoot) were collected in the Tianmu-Mountain National Nature Reserve in Zhejiang Province of China in spring, which was from the same individual used in genome sequencing. To perform the transcriptome sequencing of floral tissues, we spent over two years to look for the floral tissues of moso bamboo in 8 provinces of China because its flowering was too rare. Finally, in early summer of 2010, two reproductive tissues (panicles at early stage and panicles at flowering stage) were obtained in suburban Guilin (110°31'20.2"E, 25°10'42.7"N; 216 meter in elevation), Guangxi Province of Southern China, more than 1800 kilometers (1,100 miles) from our institute. The collected panicles from plant with no flowering or post-flowering spikelet were considered as panicle at early stage, while those from the plant growing at least 50% of flowering or post-flowering spikelet were considered as that at flowering stage.

### **Cytogenetic analysis of moso bamboo chromosomes.**

#### *Fluorescence In situ hybridization.*

Meiotic pachytene chromosomes were prepared from the root tip of freshly germinated seedling. Individual pachytene chromosomes were identified by fluorescence *in situ* hybridization using rice 45s rDNA probe<sup>2</sup>, according the method

described in Jiang *et al.*<sup>3</sup>. Digital images were recorded from an Olympus BX60 fluorescence microscope.

*Estimation of genome size of the moso bamboo by the flow cytometry.*

We put 2-month-old leaves from the sequenced bamboo individual into a flow cytometric analysis to estimate genome size as mentioned by Galbraith<sup>4</sup>. Finally, over 10,000 nuclei were analyzed per sample with a FACSAria flow cytometer (Becton, Dickinson and Company), equipped with 488 nm argon laser. 24 samples were analyzed using rice as the standard species. The software BDFACSDiva was used for data analysis with the coefficient variation controlled in 5%. The peak values of the fluorescence intensity of 24 bamboo and rice samples, the genome size of moso bamboo was estimated to be about 2,075.025 ± 13.08 Mb, or 2C DNA about 4.24 pg (1 pg DNA = 0.978×10<sup>9</sup> bp<sup>5</sup>).

**Estimation of genome size of the moso bamboo by the frequency of k-mer occurrency.**

Values of K-mers were plotted against the frequency at their occurrency (**Supplementary Fig.3**). At a K-mer size of 51, the peak occurrency is at 36. Study of the panda genome used K-mer frequency to estimate the genome size<sup>6</sup>. To avoid potential over-estimation of genome sized introduced by base errors, we turned to the modified method as described in the paper of the Tasmanian devil genome<sup>7</sup> to estimate the genome size of the moso bamboo. As the definition of genome size, the total number of effective K-mer words divided by the K-mer depth or the K-mer occurrence number at the peak kmer frequency  $D_p$ ,  $G_s = (K_n - K_s)/D_p$ . Here  $K_n$  is the total number of K-mer words and  $K_s$  is the number of single or unique K-mer words. So we estimated the genome size to be (80477036861 - 9537946584) / 36 = 1.97 Gb.

**BAC and BAC-end sequencing.**

The moso bamboo BAC library was constructed by Amplicon Express, USA,

composed of 165,888 clones harvested from a Hind-III BAC library with epicenter pCC1BAC Cloning-Ready Vector. The nuclear DNA was isolated from the same individual as used in genome sequencing. Average insert size of bamboo BAC is about 135 Kb. Eight randomly selected BACs were sequenced by using subcloning and standard Sanger sequencing methods. A total of 10,327 BACs were isolated with MACHEREY-NAGEL plasmid and large-construct DNA purification kit (NucleoSpin®96 Flash, Cat. No.740618.24). Both ends of all these BACs were sequenced by the dideoxy chain termination method using BigDye Terminator Cycle sequencing kit V3.1 (Applied Biosystems, Life Technologies). BAC end sequencing was carried out on ABI3730xl DNA analyzer. The assembling of the BACs and re-basecalling of raw BAC-end sequences were performed by the PHRED and PHRAP programs<sup>8</sup>. Manual editing was utilized to validate the accuracy of the re-basecalled reads.

### **Prediction of protein-coding genes.**

We build a 7-step pipeline to construct the gene model set (**Supplementary Fig. 7**).

1) The prediction software program, FgeneSH++ with gene model parameters trained from monocots, was used in *ab initio* gene prediction to build the preliminary gene models.

2) Coding sequences of each predicted gene model were aligned to both the Repbase TE library and the moso bamboo TE library created by RepeatModeler, using the Blastn at E-value of 1e-5.

3) The Illumina RNA-seq sequences from five vegetative and two reproductive tissues were mapped onto the coding sequences of FgeneSH gene models by the aligner SMALT with parameters set to minimum Smith-Waterman (-m) at 80 (for 2\*120 bp reads) or 60 (for 2\*100 bp reads), maximum insert size (-i) at 1,500, and minimum insert size (-j) at 20. Only uniquely matched reads were selected in assistance with gene prediction. Information between unique matches and corresponding gene models were collected by using 2 thresholds to screen SMALT cigar outputs: A) cigar:S and cigar:A items with score at 50 or more were selected. B)

for the selected cigar:A items, the available paired-end insert size should be at least 200 bp.

4) A total of 8,253 moso bamboo cDNAs, carrying entire coding sequences but not TE-derived, were selected from the 10,608 putative full-length cDNAs and were then mapped to the scaffolds by an mRNA/EST genome mapping program of GMAP<sup>9</sup> with the parameters set to “-n 1 -f 2 -B 1 -A -t 4”.

5) The gene models were screened by integrating the information from outputs of the step 2), 3), and 4), using the following 4 thresholds.

A, the gene models coding TE-elements or overlapping TE-elements greater than 10% of gene coding region were firstly discarded.

B, the models aligned to the full-length cDNAs were preferentially collected. The splicing sites were manually adjusted according to the alignment.

C, the models detected not by the FgeneSH++ but by the cDNAs were created and their coding information was added into gene model set.

D, candidate gene models without the evidence of full-length cDNAs should be supported by 2 different uniquely matched RNA-seq sequences. And at least 20% of their coding region was covered by RNA-seq reads. A pair of PE reads was treated as a single RNA-seq sequence when counting number of the mapped transcriptome reads for each model.

6) Information of cDNA-supporting UTR ends was attached to the gene model set.

7) The single-exon genes were manually checked by experts and the genes with no hits to homologs of grass genes were also discarded.

8) For the gene with different transcripts, the longest one was selected.

### **Comparison of parameters of gene models among plant genomes.**

We did comparative analysis between the bamboo genes and the genes identified from *Arabidopsis*, *Brachypodium*, rice, sorghum, and maize. The bamboo gene models exhibited very high similarity to other grass species in all of these parameters, such as the distribution of gene length, coding sequences (CDS), exon length, intron length, GC content in coding region, and exon number per gene

(**Supplementary Fig. 8**). Of compared species, only dicot *Arabidopsis* is obviously different from any other species in gene length, CDS GC content, and intron length.

### **Comparison of the assembled scaffolds to the available moso bamboo sequences in database.**

The assemblies were compared with available sequences in the public database to assess the genomic coverage and assembling accuracy. In the GenBank till October of 2011, there have been 1,086 genome survey sequences, and 18 gene sequences. Alignment of the known genomic sequences with the length over 2 Kb to our assemblies showed that over 98% of sequence region were covered by the assembled scaffolds and 91% covered by a single best match (**Supplementary Table 2**). Similar coverage, 96% of all matches and 94% of the single best match, was observed in alignment of the rest 996 genome survey sequences less than 2 Kb. Most of the sequences with low coverage have putative sequencing errors because of more biases distribution within them. The known 18 gene coding sequences with total length of 28,741 bp were parallelly mapped onto the assemblies. Almost each one had a perfect match located on a single scaffold except unmatched bases at the end of the genes (**Supplementary Table 3**). The average sequence identities in aligned region were over 98%. Our manual check revealed that most unmatched bases at the end should be the low quality bases introduced by sequencing of amplified DNA fragments. Prior to this study, over ten thousand putative full-length cDNAs were cloned and sequenced for the moso bamboo. Of them, 8,253 cDNA sequences were picked up when those TE-derived, false ORF-coding, and non-moso-bamboo items were removed. We mapped the cDNAs onto the assemblies by means of GMAP. A total of 8118 (98.4% of 8,253) cDNAs were uniquely aligned to the assembled scaffolds with very high identities (averagely at 99.1%, **Supplementary Fig. 4**). All of the sequence comparison consisted with the estimated 98% coverage of genome assembly.

To evaluate the quality of whole genome shotgun assembly, the assembled scaffolds were aligned to 8 finished bacterial artificial chromosomes (BACs)

sequences with average length 133 Kb by Sanger sequencing technology. Seven BACs were well aligned to a single scaffold and 1 BACs were aligned to 2 scaffolds each (**Supplementary Fig. 5**). The coverage of the scaffolds and initial contigs on the BACs were up to 88.8% and 98.8% (**Supplementary Table 4**), which supported our estimation of whole genome coverage of the assemblies. The frequency of single-base difference and insertion/deletion were approximately 0.19 and 0.09 per Kb, without regard to heterozygous single nucleotide polymorphisms (SNPs) and short indels detected by the annotation. The average PE read depth in aligned regions was at 100- to 132-fold coverage. The incompatible bases were inclined to located near the unclosed gaps, indicative of assembling quality were lower at the end of the initial contigs. Prior to sequence alignment, we have removed most of the sequence errors in assembly of the Sanger BACs. The detected SNPs or short indels were probably derived from potential heterozygosity or low rate assembling errors.

#### **Repeat annotation.**

The *de novo* repeat annotation revealed that the moso bamboo genome comprised approximately 59% transposable elements (TEs). Detection of the TEs in the Sanger-BACs showed 53% of TE content, similar with that in whole genome. With comparison to other grass species, the moso bamboo genome had similar TE content to that of the sorghum (62%) (main text ref. 36), and more TE content than rice (40%) (main text ref.18) and *Brachypodium* (28%)<sup>10</sup>, but lower than maize (84%) (main text ref.36, 26). Of the observed TEs, retrotransposons were the dominating repetitive sequences (39%), as well as 9.5% of DNA transposons. Like the rice, sorghum and maize genomes, the most abundant repeats in bamboo were long-terminal repeat elements (LTRs), 24.6% of *Gypsy*-type LTRs and 12.3% of *Copia*-type LTRs.

Bamboo genome has the highest copy numbers of TEs, *Gypsy/Copia*-type LTR retrotransposons and En/Spm transposons. Rice and sorghum have the highest copy numbers of MITE transposons (Tourist & Stowaway), and Harbinger transposons



and *Gypsy/Copia*-type LTR retrotransposons, respectively (**Supplementary Table 10b and 10c**). It was inferred that insertion of the LTR retrotransposons played the most important role in expansion of the higher plant genome size, though some DNA transposons also had very high copies. The TEs covering approximately 11% of the bamboo genome were not classified. However, their average unit length was within the range of the LTRs, implying that there should still be some unknown TEs active in the bamboo. A total of 9,412 intact LTR retrotransposons were predicted in our genome assemblies. The average length was approximately 10.3 Kb, 3 times of the average gene length.

We performed *de novo* prediction for LTR retrotransposons with LTRharvest and LTR\_FINDER on the large-sized scaffolds (>10 Kb), using default parameter but -maxdistltr set at 30,000. The quality criteria were the existence of one or more typical retrotransposon protein domains and the simple-repeat/tandem-repeat content less than 35%. A total of 9,142 remaining candidates were considered as the full-length LTRs, including 3,103 *Gypsy*-type (PR-RT-INT), 2,677 *Copia*-type (PR-INT-RT), and 3,632 unclassified.

### **Identification of gene synteny and whole-genome duplication.**

*Detection of syntenic genes between bamboo and rice and between bamboo and sorghum.*

To generate a pair-wise alignment of gene models between bamboo and rice (MSU RGAP 6.1) and between bamboo and sorghum (v1.4), 30,379 bamboo genes located on the larger scaffolds (>50 Kb) were aligned to the reference gene models by Blastp with E-value < 1e-20. The evidence-based gene prediction approach scarcely concerned gene colinearity between bamboo and other grasses and also expected to miss some genes. So two criteria were used to call syntenic gene blocks in bamboo scaffolds: i) number of the genes in one syntenic block  $\geq 5$ ; ii) number of non-syntenic bamboo genes between two adjacent syntenic genes <5. A perl script and following manual check was applied to determine the syntenic blocks and breakpoints between the blocks.

*Identification of the WGD by investigating the collinear orthologous genes between bamboo and rice.*

According to the location of rice genes in chromosomes, the collinear gene blocks of bamboo were mapped to the rice chromosomes. The overlapped gene blocks were manually checked to remove redundancy. As shown in **Supplemental Fig. 10a**, moso bamboo seemed to carry as two duplicates as that of rice gene model sets, though lots of bamboo genes were lost within these regions during the duplication. It was suggested that the large-scale genome duplication in bamboo resulted from whole genome duplication not from segmental duplication, which supported a tetraploid origin of bamboo. Interestingly, rice chromosomes are characteristic of diploid ( $2n=24$ ) while moso bamboo chromosomes are  $2n=48$ . There might be unknown connections between them. We collected the orthologous pairs of bamboo, which share unique rice orthologs in collinear blocks, to estimate the divergence time with a universal substitution rate of  $6.5 \times 10^{-9}$  mutations per site per year. Thus, estimated 7 to 15 mya was the potential time when two bamboo progenitors diverged (**Supplemental Fig. 10b**), and the WGD should occur more recently. However, the moso bamboo chromosomes now exhibit to be a diploid according to the FISH analysis. Consequently, we speculated that there is a long process from tetraploidization to diploidization in moso bamboo since approximately 7-12 mya. But for the bamboo species with different chromosome number or ploidy number, the process should be variable.

**Annotation of gene function and comparison of fundamental pathways.**

Prediction of gene function motifs and domains were performed by InterPro<sup>11</sup> against available databases, including ProDom, PRINTS, Pfam, Panther, Profile, PIR, Smart, and Pattern. The gene functional ontology was retrieved from the outputs of InterPro using Gene Ontology<sup>12</sup>

The bamboo gene models were aligned to entries of sorghum, rice, and maize from the KEGG database (release till April 2011) by Blastp under E-value  $1e-10$  to find the best hit for each gene. The similarity of each pathway is the ratio of number of shared enzymatic steps and sum of referenced enzymatic steps. For instance, similarity (bamboo vs. rice) = number of the enzymatic steps shared by rice and

bamboo / sum of the rice-gene-involved enzymatic steps.

### **Annotation of conserved non-coding RNA (ncRNA) genes.**

#### *Identification of transfer RNAs (tRNA).*

The tRNAScan-SE<sup>13</sup> algorithms with default parameters were applied to prediction of tRNA genes in the Arabidopsis, sorghum, maize, rice, Brachypodium, and bamboo genomes. Bamboo had 1,167 tRNA genes in the assemblies, nearly 0.5 times as many as that of maize because most of bamboo pseudogenes were not detected in the current assemblies (containing 10% unclosed gaps). The same analysis of the Arabidopsis<sup>14</sup> and Brachypodium<sup>10</sup> found 699 and 615 tRNA loci, respectively, very close to 711 and 614 identified by their Genome Initiatives, suggesting that most of bamboo tRNAs had been found. Of all conserved tRNA genes, selenocysteine and suppressor tRNAs were involved in a special coding way by the stop codons. It was interesting that 6 Selenocysteine and 1 suppressor tRNAs were detected in the bamboo genome, which were only found in maize and sorghum of Panicoideae but not in its sister groups, Brachypodium of Pooideae and rice of Ehrhartoideae.

#### *Identification of rRNA genes.*

The rRNA fragments were identified by aligning the rRNA template sequences (Rfam database<sup>15</sup>, release 10.0) of *Arabidopsis thaliana*, *Oryza sativa*, *Sorghum bicolor*, and *Zea mays* using Blastn with E-value at 1e-10 and identity cutoff at 95% or more.

#### *Identification of other non-coding RNA genes.*

The miRNA and snRNA genes were predicted by INFERNAL<sup>16</sup> software against the Rfam database (release 9.1, 1,412 families). To accelerate the speed, a rough filtering prior to INFERNAL was performed by Blastn against the Rfam sequence database under E-value at 1. For the miRNA prediction, the assemblies were aligned to the precursor sequences of *Arabidopsis thaliana*, *Brachypodium distachyon*, *Oryza sativa*, *Sorghum bicolor*, *Saccharum officinarum*, *Triticum aestivum*, *Hordeum vulgare*, and *Zea mays*, derived from the Rfam sequence database. The extended

sequences covering detected loci region and 50 bp flanking sequences from both ends of the region were put into the INFERNAL prediction with cutoff score at 30 or more. The predicted mature sequences of the bamboo miRNA were aligned to gene model set to detected miRNA target genes with Blastn under E-value at 1e-10. In the snRNA predictions, the assemblies were firstly aligned to the snRNA sequences of *Arabidopsis thaliana*, *Oryza sativa*, *Sorghum bicolor*, *Triticum aestivum* and *Zea mays* from Rfam database. The extended sequences, similar as that in miRNA prediction, were put into the INFERNAL prediction with cutoff score at 50 or more.

The C/D snoRNA were predicted using snoScan<sup>17</sup> with the yeast rRNA 16 methylation sites and yeast rRNA sequences provided by the snoScan distribution. The minimum cutoff score was based on the settings which yield a false positive rate of 30 bits. Similarly, H/ACA snoRNAs were detected by snoGPS using the yeast score tables and target pseudouridines<sup>18</sup>.

Quantity of all predicted non-coding RNA genes was listed in **Supplementary Table 9**.

### **Reconstruction of phylogeny among 6 fully sequenced grass genomes.**

The OrthoMCL clustered a total of 968 single-copy gene families among 6 fully grass and 2 dicot genomes, which was used to reconstruct the phylogeny. The coding sequences of the genes were concatenated to a supergene for each species. When the best substitution model (GTR+gamma+I) were determined by Modeltest<sup>19</sup>, the supergene sequences were subjected to phylogenetic analyses by Mrbayes (main text ref.54) with the parameter set to 1,000,000 (1 sample / 100 generations) and the first 250 sample were burned in. Two independent runs reached the same result using *Arabidopsis* as an outgroup. Branch-specific  $dN$  and  $dS$  were estimated with codeml of PAML<sup>20</sup>. The output of OrthoMCL and phylogenic tree structure were subjected to a computational analysis of changes in gene family size with the software CAFE (Online methods ref. 55).

### **Estimation of divergence time of paralogous pairs.**

To estimate the divergence time of the paralogs, we selected the gene families consisting of exactly 2 members to calculate the  $K_s$  of the pairs because the 2-member gene families had a single divergence relationship between two members. Thus, 3,786 bamboo 2-member gene clusters were put into the calculation of  $K_s$ , together with 2,552 rice, 2,161 sorghum, 1,874 Brachypodium, 3,285 maize, and 2,665 foxtail millet clusters. The  $K_s$  was calculated by a model that averages parameters across 14 candidate models ( $P$ -value < 0.001)<sup>30</sup> and then converted to the divergence time using a substitution rate of  $6.5 \times 10^{-9}$  mutations per site per year.

#### **Estimation of divergence time between orthologous genes.**

To estimate the divergence time, the  $K_s$  values were calculated between orthologs of bamboo and other genome from the 968 single-copy gene clusters determined by the OrthoMCL calculation. The  $K_s$  distribution of the one-to-one orthologous pairs of bamboo-Brachypodium, bamboo-rice, bamboo-foxtail-millet, bamboo-sorghum, bamboo-maize, and bamboo-wheat suggested the different divergence time between bamboo and other grass genome, which was consisted with the phylogenic relationship generated by Mrbayes analysis. The mean  $K_s$  was used to estimated the divergence time between different genomes. The internal duplication during the WGD was estimated by calculating the  $K_s$  of the paralogs in 2-member gene families of bamboo and maize, which was then converted to the divergence time to indicate the WGD time.

#### **Calling of heterozygous SNPs and small indels.**

To detect the heterozygous sequence polymorphism, all of the used PE reads (around 120× coverage) were firstly mapped to the assembled scaffolds by aligner SMALT. The SNPs were then called by SSAHA\_Pileup (version 0,8) and 6 thresholds were used to post-filter unreliable SNPs: 1) SSAHA\_Pileup SNP score  $\geq 20$ ; 2) ratio of two alleles between 3:17 to 17:3; 3) the highest sequencing depth of SNP position  $\leq 240$ ; 4) the lowest sequencing depth for each allele  $\geq 5$ ; 5) the

minimum distance for adjacent SNPs  $\geq 10$  bp; 6) only one polymorphism detected at each SNP position. The small indel (length  $\leq 6$  bp) were called by the Pindel<sup>21</sup> and 4 thresholds were used to remove unreliable small indels: 1) length of indels  $\leq 6$  bp; 2) the highest sequencing depth of indel position  $\leq 240$ ; 3) the lowest sequencing depth for each allele  $\geq 5$ ; 4) ratio of gapped and ungapped reads at the indel position between 3:17 to 17:3.

## References

1. Jiang, Z.H. World Bamboo and Rattan (in Chinese). *Liaoning Science and Technology Publishing House, Shenyang, China* (2002).
2. Fukui, K., Ohmido, N. & KhushG, S. Variability in rDNA loci in the genus *Oryza* detected through fluorescence *in situ* hybridization. *Theor. Appl. Genet.* **87**, 893-899 (1994).
3. Jiang, J. & Gill, B.S. Sequential chromosome banding and *in situ* hybridization analysis. *Genome* **36**, 792-795 (1993).
4. Galbraith, D.W. *et al.* Rapid flow cytometric analysis of the cell cycle in intact plant tissues. *Science* **220**, 1049-1051 (1983).
5. Dolezel, J., Greilhuber, J. & Suda, J. Estimation of nuclear DNA content in plants using flow cytometry. *Nat. Protoc.* **2**, 2233-2244 (2007).
6. Li, R. *et al.* The sequence and *de novo* assembly of the giant panda genome. *Nature* **463**, 311-317 (2009).
7. Murchison, E.P. *et al.* Genome Sequencing and Analysis of the *Tasmanian Devil* and Its Transmissible Cancer. *Cell* **148**, 780-791 (2012).
8. Ewing, B. & Green, P. Base-calling of automated sequencer traces using PHRED. II. Error probabilities. *Genome Res.* **8**, 186-194 (1998).
9. Wu, T.D. & Watanabe, C.K. GMAP: a genomic mapping and alignment program for mRNA and EST sequences. *Bioinformatics* **21**, 1859-1875 (2005).
10. Vogel, J.P. *et al.* Genome sequencing and analysis of the model grass *brachypodium distachyon*. *Nature* **463**, 763-768 (2010).
11. Mulder, N.J. *et al.* New developments in the InterPro database. *Nucleic Acids Res.* **35**, D224-228 (2007).
12. Ashburner, M. *et al.* Gene ontology: tool for the unification of biology. The Gene Ontology Consortium. *Nat. Genet.* **25**, 25-29 (2000).
13. Lowe, T.M. & Eddy, S.R. tRNAscan-SE: a program for improved detection of transfer RNA genes in genomic sequence. *Nucleic Acids Res.* **25**, 955-964 (1997).
14. Arabidopsis Genome Initiative. Analysis of the genome sequence of the flowering plant *Arabidopsis thaliana*. *Nature* **408**, 796-815 (2000).
15. Griffiths-Jones, S. *et al.* Rfam: annotating non-coding RNAs in complete genomes. *Nucleic Acids Res.* **33** (Database issue), D121-124 (2005).
16. Nawrocki, E.P., Kolbe, D.L. & Eddy, S.R. Infernal 1.0: inference of RNA alignments. *Bioinformatics* **25**, 1335-1337 (2009).

17. Lowe, T.M. & Eddy, S.E. A computational screen for methylation guide snoRNAs in yeast. *Science* **283**, 1168-1171 (1999).
18. Schattner, P. *et al.* Genome-wide Searching for Pseudouridylation Guide snoRNAs: Analysis of the *Saccharomyces cerevisiae* genome. *Nucleic Acids Res.* **32**, 4281-4296 (2004).
19. Posada, D. & Crandall, K.A. MODELTEST: testing the model of DNA substitution. *Bioinformatics* **14**, 817-818 (1998).
20. Yang, Z. PAML 4: Phylogenetic Analysis by Maximum Likelihood. *Molecular Biology and Evolution* **24**, 1586-1591 (2007).
21. Ye, K., Schulz, M.H., Long, Q., Apweiler, R. & Ning, Z. Pindel: a pattern growth approach to detect break points of large deletions and medium sized insertions from paired-end short reads. *Bioinformatics* **25**, 2865-2871 (2009).
22. Thurston, M.I. & Field, D, Msatfinder: detection and characterization of microsatellites. [<http://www.genomics.ceh.ac.uk/msatfinder/>] website Oxford UK (2005).
23. Tadege, M. *et al.* Reciprocal control of flowering time by *OsSOC1* in transgenic Arabidopsis and by *FLC* in transgenic rice. *Plant Biotechnol. J.* **1**, 361-369 (2003).
24. Endo-Higashi, N. & Izawa, T. Flowering time genes *Heading date 1* and *Early heading date 1* together control panicle development in rice. *Plant Cell Physiol.* **52**, 1083-1094 (2011).
25. Li, D. *et al.* Functional characterization of rice *OsDof12*. *Planta* **229**, 1159-1169 (2009).
26. Li, D., Yang, C., Li, X., Ji, G. & Zhu, L. Sense and antisense *OsDof12* transcripts in rice. *BMC Mol. Biol.* **17**, 80 (2008).
27. Kurtz, S. *et al.* Versatile and open software for comparing large genomes. *Genome Biol.* **5**, R12 (2004).
28. Tanaka, T. *et al.* The Rice Annotation Project Database (RAP-DB): 2008 update. *Nucleic Acids Res.* **36** (Database issue), D1028-1033 (2008). Rap-db IRGSP5 at <http://rapdb.dna.affrc.go.jp/>
29. Zhang, X.M. *et al.* De Novo Sequencing and Characterization of the Floral Transcriptome of *Dendrocalamus latiflorus* (Poaceae: Bambusoideae). *PLoS One* **7**:e42082 (2012).
30. Zhang, Z. *et al.* KaKs\_Calculator: calculating Ka and Ks through model selection and model averaging. *Genomics Proteomics Bioinformatics* **4**, 259-263 (2006).



31. Cocuron, J.C. *et al.* A gene from the cellulose synthase-like C family encodes a beta-1,4 glucan synthase. *Proc. Natl. Acad. Sci. USA.* **104**, 8550-8555(2007).
32. Liepman, A.H., Wilkerson, C.G. & Keegstra, K. Expression of cellulose synthase-like (*Csl*) genes in insect cells reveals that *CsIA* family members encode mannan synthases. *Proc. Natl. Acad. Sci. USA.* **102**, 2221-2226 (2005).
33. Davis, J., Brandizzi, F., Liepman, A.H. & Keegstra, K. Arabidopsis mannan synthase CSLA9 and glucan synthase CSLC4 have opposite orientations in the Golgi membrane. *Plant J.* **64**, 1028-1037 (2010).
34. Wan, L. *et al.* Transcriptional Activation of *OsDERF1* in *OsERF3* and *OsAP2-39* Negatively Modulates Ethylene Synthesis and Drought Tolerance in Rice. *PLoS One* **6**, e25216 (2011).
35. Xiang, Y., Tang, N., Du, H., Ye, H. & Xiong L. Characterization of *OsbZIP23* as a Key Player of the Basic Leucine Zipper Transcription Factor Family for Conferring Abscisic Acid Sensitivity and Salinity and Drought Tolerance in Rice. *Plant Physiol.* **148**, 1938-1952 (2008).
36. Nijhawan, A., Jain, M., Tyagi, A.K. & Khurana, J.P. Genomic Survey and Gene Expression Analysis of the Basic Leucine Zipper Transcription Factor Family in Rice. *Plant Physiol.* **146**, 333-350 (2008).
37. Jeong, J.S. *et al.* Root-Specific Expression of *OsNAC10* Improves Drought Tolerance and Grain Yield in Rice under Field Drought Conditions. *Plant Physiol.* **153**, 185-197 (2010).
38. Hu, H. *et al.* Overexpressing a NAM, ATAF, and CUC (NAC) transcription factor enhances drought resistance and salt tolerance in rice. *Proc. Natl. Acad. Sci. USA.* **103**, 12987-12992 (2006).
39. Huang, J. *et al.* SRWD: A novel WD40 protein subfamily regulated by salt stress in rice (*Oryza sativa* L.). *Gene* **424**, 71-79 (2008).
40. Toriba, T. *et al.* Molecular characterization the YABBY gene family in *Oryza sativa* and expression analysis of *OsYABBY1*. *Mol Genet Genomics* **277**, 457-468 (2007).
41. Sato, Y. & Yokoya, S. Enhanced tolerance to drought stress in transgenic rice plants overexpressing a small heat-shock protein, sHSP17.7. *Plant Cell Rep.* **27**, 329-334 (2008).
42. Kurusu, T. *et al.* Regulation of Microbe-Associated Molecular Pattern-Induced Hypersensitive Cell Death, Phytoalexin Production, and Defense Gene Expression by Calcineurin B-Like Protein-Interacting Protein Kinases,

- OsCIPK14/15, in Rice Cultured Cells. *Plant Physiol.* **153**, 678-692 (2010).
43. Pi-Fang L.C. *et al.* Induction of a cDNA clone from rice encoding a class II small heat shock protein by heat stress, mechanical injury, and salicylic acid. *Plant Science*, **172**, 64-75 (2007).
  44. Lee, B.H. *et al.* Expression of the chloroplast-localized small heat shock protein by oxidative stress in rice. *Gene* **245**, 283-290 (2000).
  45. Zou, J. *et al.* Expression analysis of nine rice heat shock protein genes under abiotic stresses and ABA treatment. *J Plant Physiol.* **166**, 851-861 (2009).
  46. Liu, J.G. *et al.* *OsHSF7* gene in rice, *Oryza sativa* L., encodes a transcription factor that functions as a high temperature receptive and responsive factor. *BMB Rep.* **42**, 16-21 (2009).
  47. Singh, A. *et al.* *OsHsfA2c* and *OsHsfB4b* are involved in the transcriptional regulation of cytoplasmic *OsClpB* (Hsp100) gene in rice (*Oryza sativa* L.). *Cell Stress Chaperones* **17**, 243-254 (2012).
  48. Welinder, K.G. *et al.* Structural diversity and transcription of class III peroxidases from *Arabidopsis thaliana*. *Eur. J. Biochem.* **269**, 6063-6081 (2002).
  49. Rizhsky, L. *et al.* When defense pathways collide. The response of *Arabidopsis* to a combination of drought and heat stress. *Plant Physiol.* **134**, 1683-1696 (2004).
  50. Tehseen, M., Cairns, N., Sherson, S. & Cobbett, C.S. Metallochaperone-like genes in *Arabidopsis thaliana*. *Metallomics* **2**, 556-564 (2010).
  51. Murphy, A., Zhou, J. Goldsbrough, P.B., Taizk, L. Purification and immunological identification of metallothioneins 1 and 2 from *Arabidopsis thaliana*. *Plant Physiol.* **113**, 1293-1301 (1997).
  52. Abe, H. *et al.* Role of *Arabidopsis* MYC and MYB homologs in drought- and abscisic acid-regulated gene expression. *Plant Cell* **9**, 1859-1868 (1997).
  53. Weig, A., Deswarte, C. & Chrispeels, M.J. The major intrinsic protein family of *Arabidopsis* has 23 members that form three distinct groups with functional aquaporins in each group. *Plant Physiol.* **114**, 1347-1357 (1997).
  54. Imaizumi, T., Schultz, T.F., Harmon, F.G., Ho, L.A. & Kay, S.A. FKF1 F-box protein mediates cyclic degradation of a repressor of *CONSTANS* in *Arabidopsis*. *Science* **309**, 293-297 (2005).
  55. Takahashi, Y. & Shimamoto, K. *Heading date 1 (Hd1)*, an ortholog of *Arabidopsis* *CONSTANS*, is a possible target of human selection during domestication to diversify flowering times of cultivated rice. *Genes Genet Syst.*

- 86**, 175-182 (2011).
56. Kobayashi, Y., Kaya, H., Goto, K., Iwabuchi, M. & Araki, T. A pair of related genes with antagonistic roles in mediating flowering signals. *Science* **286**, 1960-2 (1999).
  57. Nakagawa, M., Shimamoto, K. & Kyojuka, J. Overexpression of *RCN1* and *RCN2*, rice *TERMINAL FLOWER 1/CENTRORADIALIS* homologs, confers delay of phase transition and altered panicle morphology in rice. *Plant J.* **29**, 743-750 (2002).
  58. Ryu, J.Y., Park, C.M. & Seo, P.J. The floral repressor *BROTHER OF FT AND TFL1* (*BFT*) modulates flowering initiation under high salinity in Arabidopsis. *Mol. Cells* **32**, 295-303 (2011).
  59. Xi, W. & Yu, H. *MOTHER OF FT AND TFL1* regulates seed germination and fertility relevant to the brassinosteroid signaling pathway. *Plant Signal Behav.* **5**, 1315-1317 (2010).
  60. Valdés, A.E. *et al.* Arabidopsis thaliana *TERMINAL FLOWER2* is involved in light-controlled signalling during seedling photomorphogenesis. *Plant Cell Environ.* **35**, 1013-1025 (2012).
  61. Rao, N.N., Prasad, K., Kumar, P.R. & Vijayraghavan, U. Distinct regulatory role for *RFL*, the rice *LFY* homolog, in determining flowering time and plant architecture. *Proc Natl Acad Sci U S A.* **105**, 3646-3651 (2008).
  62. Liu, C., Xi, W., Shen, L., Tan, C. & Yu, H. Regulation of floral patterning by flowering time genes. *Dev. Cell* **16**, 711-722 (2009).
  63. Kobayashi, Y., Kaya, H., Goto, K., Iwabuchi, M. & Araki, T. A pair of related genes with antagonistic roles in mediating flowering signals. *Science* **286**, 1960-1962 (1999).
  64. Hanano, S. & Goto, K. Arabidopsis *TERMINAL FLOWER 1* is involved in the regulation of flowering time and inflorescence development through transcriptional repression. *Plant Cell* **23**, 172-3184 (2011).
  65. Gocal, G.F. *et al.* GAMYB-like genes, flowering, and gibberellin signaling in Arabidopsis. *Plant Physiol.* **127**, 1682-1693 (2011).
  66. Banas, A.K., Łabuz, J., Sztatelman, O., Gabrys, H. & Fiedor, L. Expression of enzymes involved in chlorophyll catabolism in Arabidopsis is light controlled. *Plant Physiol.* **157**, 1497-1504 (2011).
  67. El-Assal, S. E. D. *et al.* The role of Cryptochrome 2 in flowering in Arabidopsis. *Plant Physiol.* **133**, 1504-1516 (2003).
  68. Piñeiro, M., Gómez-Mena, C., Schaffer, R., Martínez-Zapater, J.M. & Coupland,

- G. *EARLY BOLTING IN SHORT DAYS* is related to chromatin remodeling factors and regulates flowering in Arabidopsis by repressing *FT*. *Plant Cell* **15**, 1552-1562 (2003).
69. Reeves, P. H., Murtas, G., Dash, S., & Coupland, G. early in short days 4, a mutation in Arabidopsis that causes early flowering and reduces the mRNA abundance of the floral repressor *FLC*. *Development* **129**, 5349-5361 (2002).
  70. Sawa, M., Nusinow, D. A., Kay, S. A., & Imaizumi, T. *FKF1* and *GIGANTEA* complex formation is required for day-length measurement in Arabidopsis. *Science* **318**, 261-265 (2007).
  71. Lim, M. H. *et al.* A new Arabidopsis gene, *FLK*, encodes an RNA binding protein with K homology motifs and regulates flowering time via *FLOWERING LOCUS C*. *Plant Cell* **16**, 731-740 (2004).
  72. Kania, T., Russenberger, D., Peng, S., Apel, K., & Melzer, S. *FPF1* promotes flowering in Arabidopsis. *Plant Cell* **9**, 1327-1338 (1997).
  73. Johanson, U. *et al.* Molecular analysis of *FRIGIDA*, a major determinant of natural variation in Arabidopsis flowering time. *Science* **290**, 344-347 (2000).
  74. Kardailsky, I. *et al.* Activation tagging of the floral inducer *FT*. *Science* **286**, 1962-1965 (1999).
  75. Yamaguchi, A., Kobayashi, Y., Goto, K., Abe, M., & Araki, T. *TWIN SISTER OF FT (TSF)* Acts As a Floral Pathway Integrator Redundantly with *FT*. *Plant Cell Physiol.* **46**, 1175-1189 (2005).
  76. Ausin, I., Alonso-Blanco, C., Jarillo, J. A., Ruiz-Garcia, L., & Martinez-Zapater, J. M. Regulation of flowering time by FVE, a retinoblastoma-associated protein. *Nat. Genet.* **36**, 162-166 (2004).
  77. Silverstone, A. L., Chang, C., Krol, E., & Sun, T. P. Developmental regulation of the gibberellin biosynthetic gene *GA1* in *Arabidopsis thaliana*. *Plant J.* **12**, 9-19 (1997).
  78. Peng, J. *et al.* The Arabidopsis *GAI* gene defines a signaling pathway that negatively regulates gibberellin responses. *Gen. Dev.* **113**, 194-207 (1997).
  79. Silverstone, A. L., Ciampaglio, C. N., & Sun, T. The Arabidopsis *RGA* gene encodes a transcriptional regulator repressing the gibberellin signal transduction pathway. *Plant Cell* **10**, 155-169 (1998).
  80. Tyler, L. *et al.* *Della* proteins and gibberellin-regulated seed germination and floral development in Arabidopsis. *Plant Physiol.* **135**, 1008-1019 (2004).
  81. Voegelé, A., Linkies, A., Müller, K. & Leubner-Metzger, G. Members of the

- gibberellin receptor gene family *GID1* (*GIBBERELLIN INSENSITIVE DWARF 1*) play distinct roles during *Lepidium sativum* and *Arabidopsis thaliana* seed germination. *J. Exp. Bot.* **62**, 5131-5147 (2011).
82. Lee, H. *et al.* The Arabidopsis HOS1 gene negatively regulates cold signal transduction and encodes a RING finger protein that displays cold-regulated nucleo--cytoplasmic partitioning. *Genes Dev.* **15**, 912-924 (2001).
  83. Lee, I., Michaels, S. D., Masshardt, A. S., & Amasino, R. M. The late-flowering phenotype of *FRIGIDA* and mutations in *LUMINIDEPENDENS* is suppressed in the *Landsberg erecta* strain of Arabidopsis. *Plant J.* **6**, 903-909 (1994).
  84. Iñigo, S., Alvarez, M.J., Strasser, B., Califano, A. & Cerdán, P.D. *PFT1*, the MED25 subunit of the plant Mediator complex, promotes flowering through *CONSTANS* dependent and independent mechanisms in Arabidopsis. *Plant J.* **69**, 601-612 (2012).
  85. Maloof, J. N. *et al.* Natural variation in light sensitivity of Arabidopsis. *Nat. Genet.* **29**, 441-446 (2001).
  86. Noh, Y. S. & Amasino, R. M. *PIE1*, an *ISWI* family gene, is required for *FLC* activation and floral repression in Arabidopsis. *Plant Cell* **15**, 1671-1682 (2003).
  87. McGinnis, K. M. *et al.* The Arabidopsis *SLEEPY1* gene encodes a putative F-box subunit of an SCF E3 ubiquitin ligase. *Plant Cell* **15**, 1120-1130 (2003).
  88. Lee, J., Oh, M., Park, H. & Lee, I. *SOC1* translocated to the nucleus by interaction with *AGL24* directly regulates leafy. *Plant J.* **55**, 832-843 (2008).
  89. Jacobsen, S. E., Binkowski, K. A. & Olszewski, N. E. SPINDLY, a tetratricopeptide repeat protein involved in gibberellin signal transduction in Arabidopsis. *Proc. Natl. Acad. Sci. U S A.* **93**, 9292-9296 (1996).
  90. Sung, S. B. & Amasino, R. M. Vernalization in *Arabidopsis thaliana* is mediated by the PHD finger protein VIN3. *Nature* **427**, 159-164 (2004).
  91. Greb, T. *et al.* The PHD finger protein VRN5 functions in the epigenetic silencing of Arabidopsis FLC. *Curr. Biol.* **17**, 73-78 (2007).
  92. Boonburapong, B. & Buaboocha, T. Genome-wide identification and analyses of the rice calmodulin and related potential calcium sensor proteins. *BMC Plant Biol.* **7**, 4 (2007).
  93. Jan, A. *et al.* Gibberellin Regulates Mitochondrial Pyruvate Dehydrogenase Activity in Rice. *Plant Cell Physiol.* **47**, 244-253 (2006).
  94. Ge, L.F. *et al.* Overexpression of the trehalose-6-phosphate phosphatase gene *OsTPP1* confers stress tolerance in rice and results in the activation of stress

- responsive genes. *Planta* **228**, 191-201 (2008).
95. Huang, Y., Xiao, B. & Xiong, L. Characterization of a stress responsive proteinase inhibitor gene with positive effect in improving drought resistance in rice. *Planta* **226**, 73-85 (2007).
  96. Ohnishi, T. *et al.* *OsNAC6*, a member of the NAC gene family, is induced by various stresses in rice. *Genes Genet Syst.* **80**, 135-139 (2005).
  97. Wang, C., Zhang, Q. & Shou H.X. Identification and expression analysis of *OsHsfs* in rice. *J Zhejiang Univ. Sci. B.* **10**, 291-300 (2009).
  98. Shan, G.Y. *et al.* Analysis of the rice *SHORT-ROOT5* gene revealed functional diversification of plant neutral/alkaline invertase family. *Plant Science*, **176**, 627-634 (2009).
  99. Kawasaki, T. *et al.* Cinnamoyl-CoA reductase, a key enzyme in lignin biosynthesis, is an effector of small GTPase Rac in defense signaling in rice. *Proc Natl. Acad. Sci. U S A.* **103**, 230-235 (2006).
  100. Garg, R., Jhanwar, S., Tyagi, A. & Jain, M. Genome-Wide Survey and Expression Analysis Suggest Diverse Roles of Glutaredoxin Gene Family Members During Development and Response to Various Stimuli in Rice. *DNA Res.* **17**, 353-367 (2010).
  101. Siriporn, S. *et al.* Exogenous ABA induces salt tolerance in indica rice (*Oryza sativa* L.): The role of *OsP5CS1* and *OsP5CR* gene expression during salt stress. *Env Exp Bot* **86**, 94-105 (2011).
  102. Ramamoorthy, R., Jiang, S.Y. & Ramachandran, S. *Oryza sativa* Cytochrome P450 Family Member *OsCYP96B4* Reduces Plant Height in a Transcript Dosage Dependent Manner. *PLoS One* **6**, e28069 (2011).
  103. Jung, K.H. *et al.* Wax-deficient *anther1* Is Involved in Cuticle and Wax Production in Rice Anther Walls and Is Required for Pollen Development. *Plant Cell* **18**, 3015-3032 (2006).
  104. Tatsuro, H., Graham N.S. & Tomio, T. An expression analysis profile for the entire sucrose synthase gene family in rice. *Plant Science* **174**, 534-543 (2008).
  105. Kong, Z., Li, M., Yang, W., Xu, W. & Xue, Y. A Novel Nuclear-Localized CCCH-Type Zinc Finger Protein, *OsDOS*, Is Involved in Delaying Leaf Senescence in Rice. *Plant Physiol.* **141**, 1376-1388 (2006).
  106. Morsy, M.R. *et al.* The *OsLti6* genes encoding low-molecular-weight membrane proteins are differentially expressed in rice cultivars with contrasting sensitivity to low temperature. *Gene* **344**, 171-180 (2005).

107. Singh, A., Singh, U., Mittal, D. & Grover, A. Genome-wide analysis of rice *ClpB/HSP100*, *ClpC* and *ClpD* genes. *BMC Genomics* **11**, 95 (2010).
108. Wang, Y. *et al.* An ethylene response factor *OsWR1* responsive to drought stress transcriptionally activates wax synthesis related genes and increases wax production in rice. *Plant Mol Biol.* **78**, 275-288 (2012).
109. Ishida, S. *et al.* Allocation of Absorbed Light Energy in PSII to Thermal Dissipations in the Presence or Absence of *PsbS* Subunits of Rice. *Plant Cell Physiol.* **52**, 1822-1831 (2011).
110. Zhong, R. *et al.* Transcriptional Activation of Secondary Wall Biosynthesis by Rice and Maize NAC and MYB Transcription Factors. *Plant Cell Physiol.* **52**, 1856-1871 (2011).
111. Huang, J. *et al.* A novel rice C2H2-type zinc finger protein lacking DLN-box/EAR-motif plays a role in salt tolerance. *Biochim. Biophys. Acta.* **1769**, 220-227 (2007).
112. Zhang C.J. *et al.* An Apoplastic H-Type Thioredoxin Is Involved in the Stress Response through Regulation of the Apoplastic Reactive Oxygen Species in Rice. *Plant Physiol.* **157**, 1884-1899 (2011).
113. Esther, N. *et al.* The expression of the large rice FK506 binding proteins (FKBPs) demonstrate tissue specificity and heat stress responsiveness. *Plant Science* **170**, 695-704 (2006).
114. Akiyama, T., Pillai, M.A. & Sentoku, N. Cloning, characterization and expression of *OsGLN2*, a rice endo-1,3- $\beta$ -glucanase gene regulated developmentally in flowers and hormonally in germinating seeds. *Planta* **220**, 129-139 (2004).
115. Yadav, S.R., Khanday, I., Majhi, B.B., Veluthambi, K. & Vijayraghavan, U. Auxin-Responsive *OsMGH3*, a Common Downstream Target of *OsMADS1* and *OsMADS6*, Controls Rice Floret Fertility. *Plant Cell Physiol.* **52**, 2123-2135 (2011).
116. Li, H. *et al.* Rice *MADS6* Interacts with the Floral Homeotic Genes *SUPERWOMAN1*, *MADS3*, *MADS58*, *MADS13*, and *DROOPING LEAF* in Specifying Floral Organ Identities and Meristem Fate. *Plant Cell* **23**, 2536-2552 (2011).
117. Seino, J. *et al.* Characterization of rice nucleotide sugar transporters capable of transporting UDP-galactose and UDP-glucose. *J Biochem.* **148**, 35-46 (2010).
118. Wang, R., Shen, W.B., Liu, L.L., Jiang, L. & Wan, J.M. Cloning and expression of

*OsLOX1* gene encoding rice lipoxygenase. *Rice Genetics Newsletters* **24**, 37-40 (2008).

119. Islam, M.A., Du, H., Ning, J., Ye, H. & Xiong, L. Characterization of *Glossy1*-homologous genes in rice involved in leaf wax accumulation and drought resistance. *Plant Mol. Biol.* **70**, 443-456 (2009).



## Supplementary Figures

a

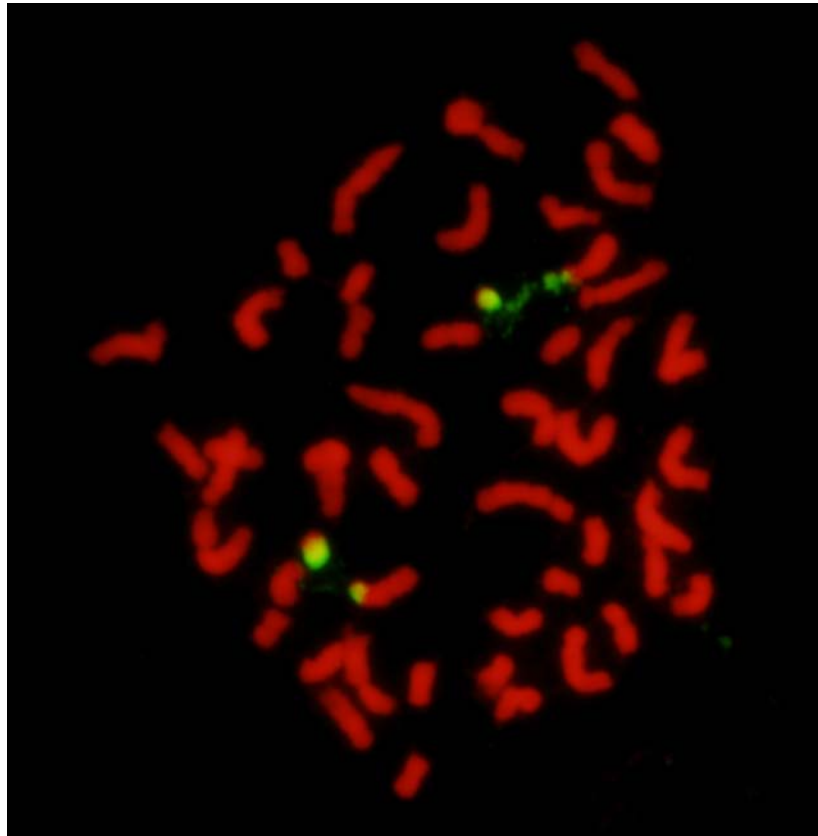

b

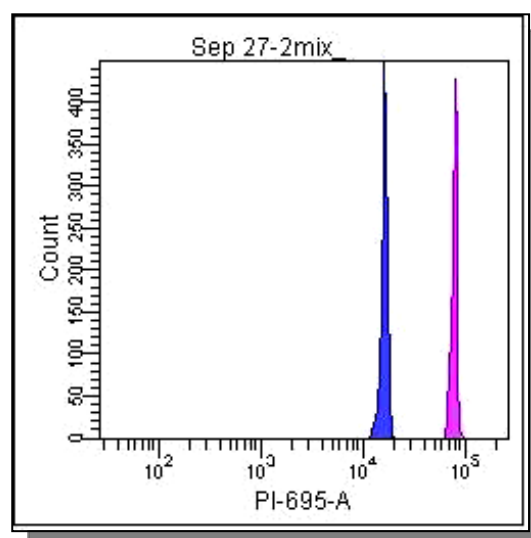

**Supplementary Figure 1** Cytogenetic analysis of bamboo chromosomes. (a)

Fluorescence *in situ* hybridization of the moso bamboo at mitotic metaphase with the probe of rice 45S rDNA. The chromosomes were dyed by DAPI. The 45S rDNA probe was labeled with digoxin. Signals were detected by FITC with a magnification of microscope at 200 times. Two copies of chromosome sets were displayed. **(b)** Test result of *Oryza sativa* and *Phyllostachys heterocycla* mixed samples by using flow cytometry. The term C-value refers to the amount (picograms) of DNA contained within a haploid nucleus or one half the amount in a diploid somatic cell of a eukaryotic organism. Blue peak indicated 2 C DNA of *Oryza sativa* at 16,378. Pink peak indicated 2 C DNA of *Phyllostachys heterocycla* at 79,892. Compared with that of rice (430 Mb), genome size of the moso bamboo was estimated to be  $2\ 075.025 \pm 13.08$  Mb.

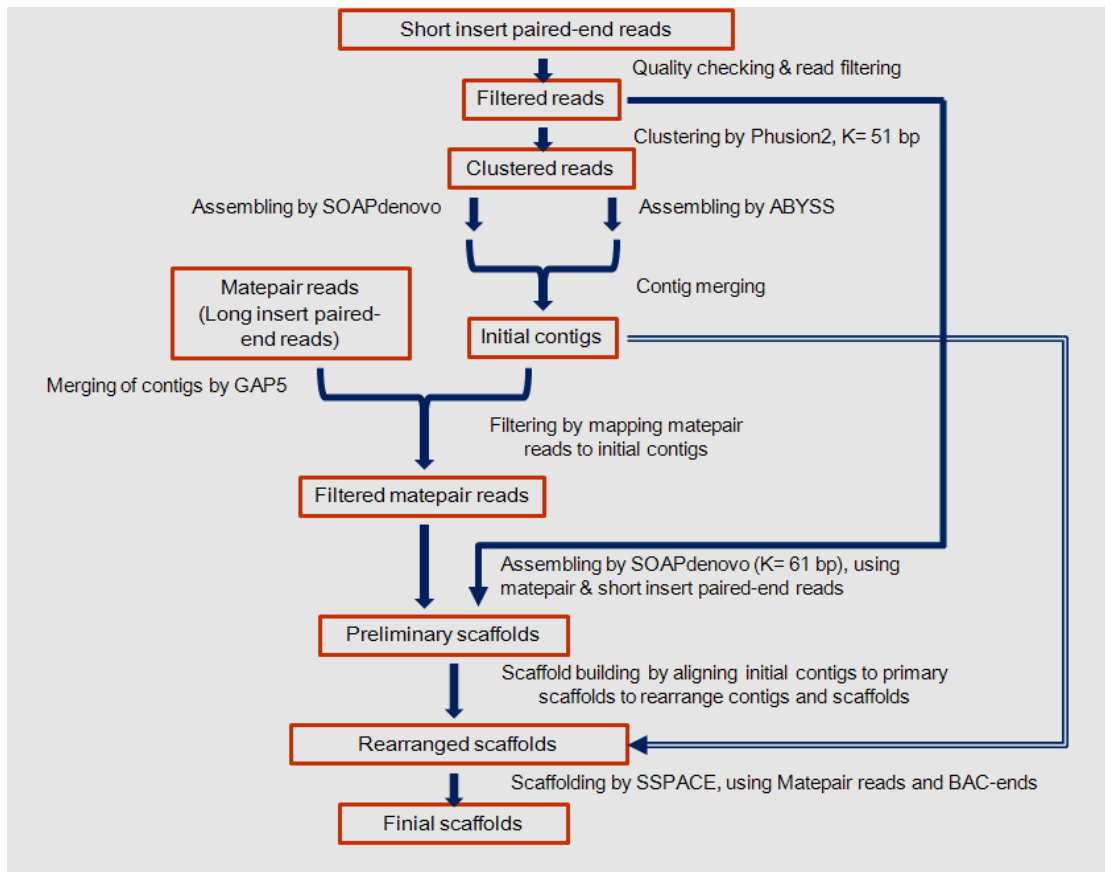

**Supplementary Figure 2** Phusion-meta pipeline of short read assembly. To complete assembly of this highly heterozygous genome, we developed an integrated *de novo* assembly pipeline for large-sized genomes using short read sequencing data. Although this pipeline used existing algorithms and assembler, there were three critical variables introduced into the assembling strategy: i) filtering of the paired-end (PE) reads by K-mer occurrence to lower sequence error; ii) clustering of the reads before assembling to reduce assembling errors derived by direct assembling of the short read; iii) multiple use of reads and contigs in different cycles to make up for deficiencies of different algorithms. Thus, we generated comparatively high-quality assemblies by using nearly entire short reads. This pipeline therefore can be efficiently used in *de novo* assembly of complex and large-sized genomes.

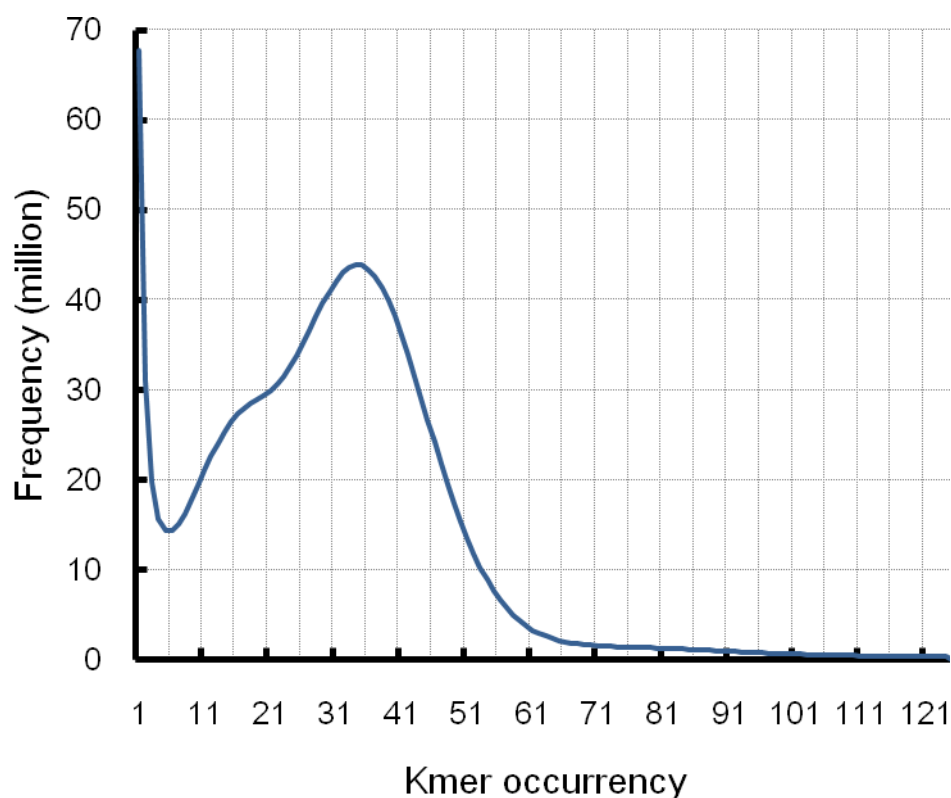

**Supplementary Figure 3** Distribution of Kmer frequency. Distribution of 51-mer frequency in the reads of short insert size libraries (350 - 400 bp). Values of K-mers were plotted against the frequency (y-axis) at their occurrence (x-axis). The leftmost truncated peak at low occurrence (1-2) was mainly due to random base errors in the raw sequencing reads. The frequency exhibited a bi-modality caused by heterozygosity.

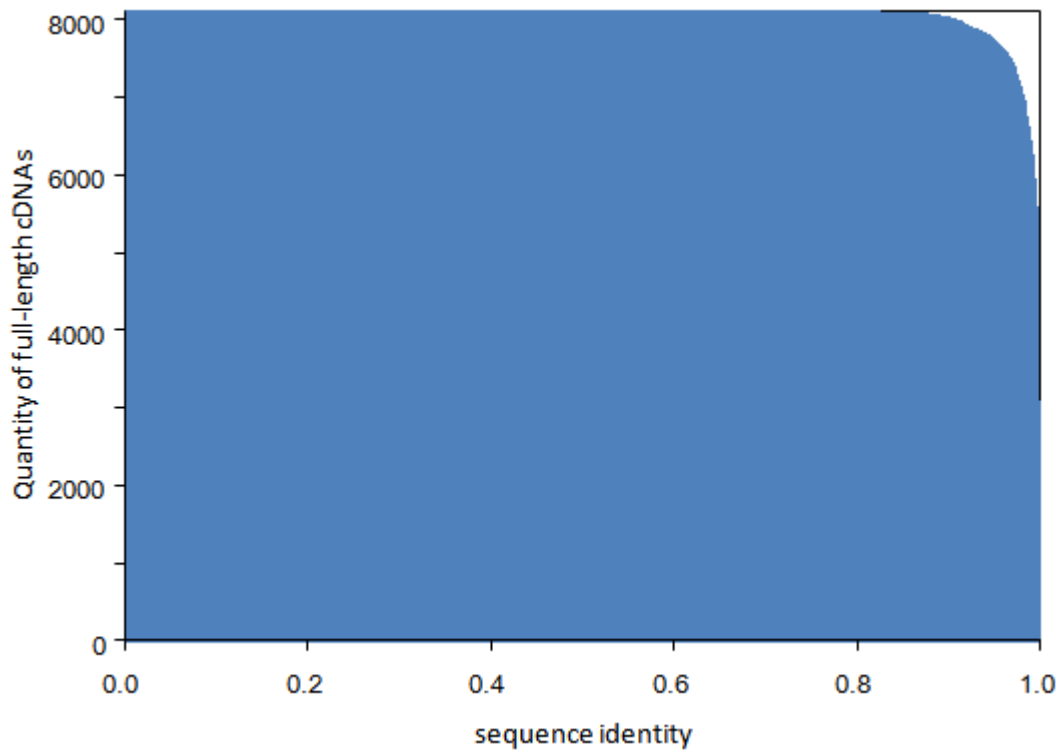

**Supplementary Figure 4** Mapping of the full-length cDNA sequences to the moso bamboo genome. The cDNA sequences were aligned to the assembled scaffolds. Totally, 8,118 of 8,253 (98.4%) cDNAs were uniquely mapped onto the assemblies with high identities at 99.1% using the GMAP. The Y axis showed accumulative frequency of the aligned cDNAs. The X axis exhibited the identity of sequence alignment.

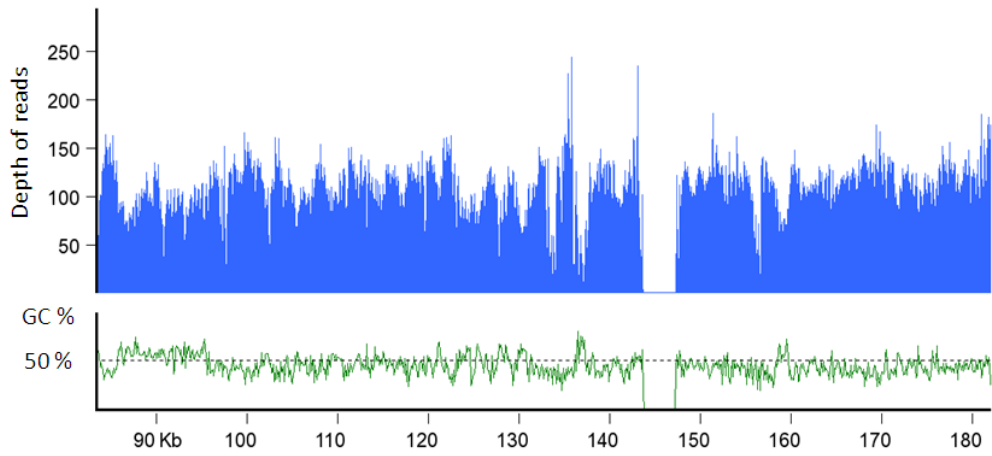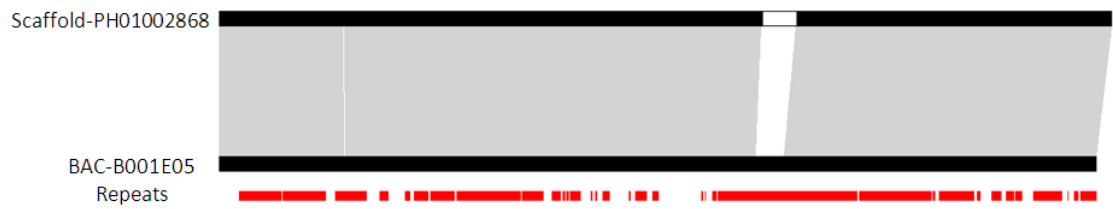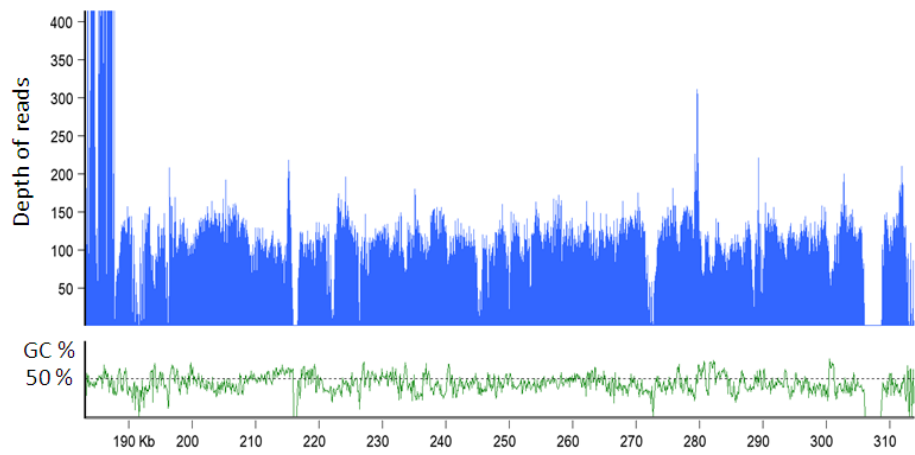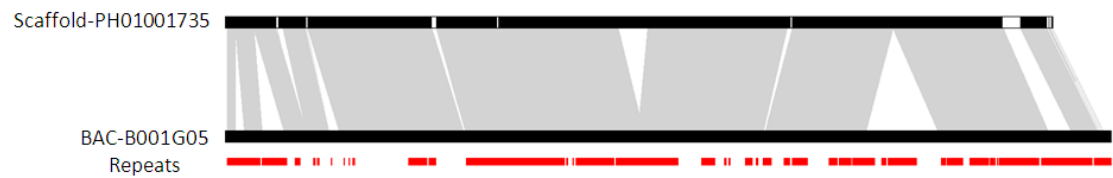

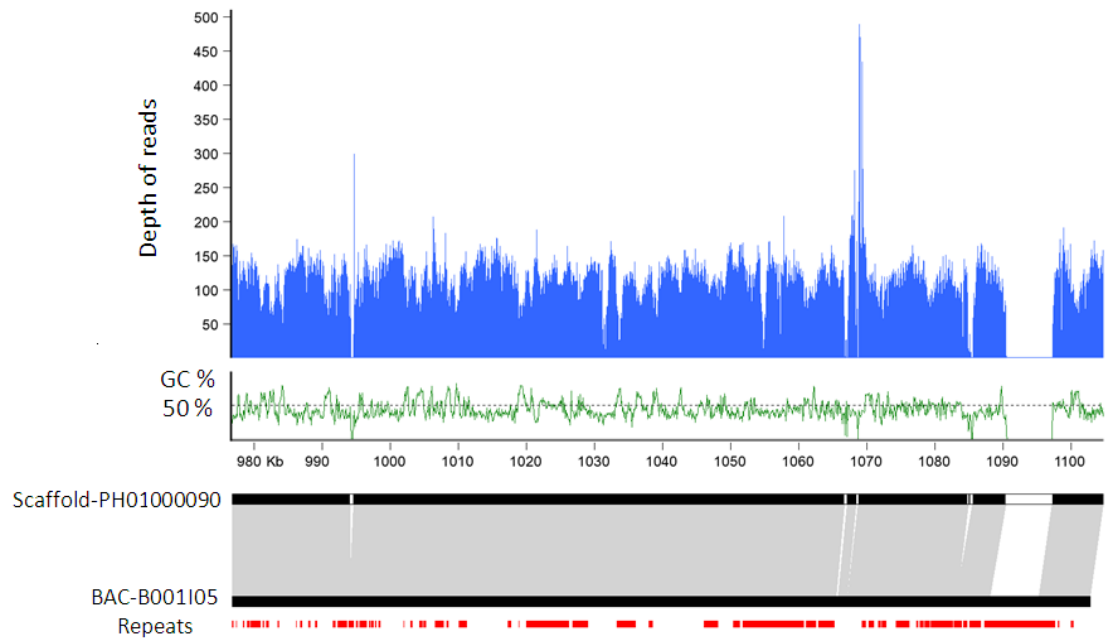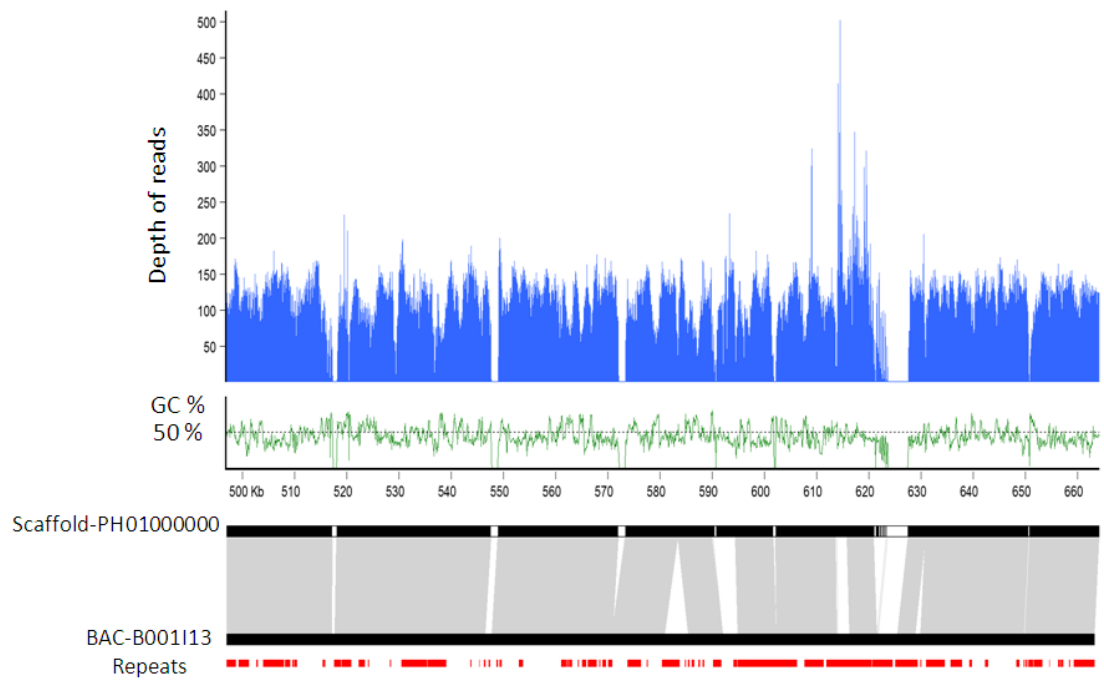

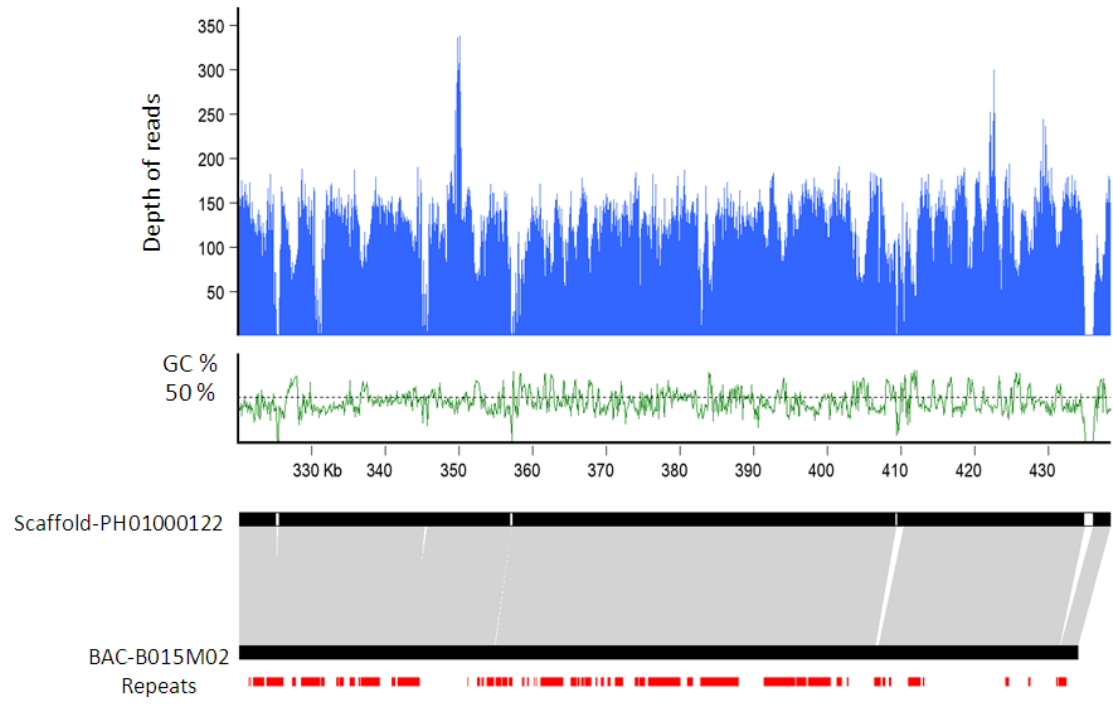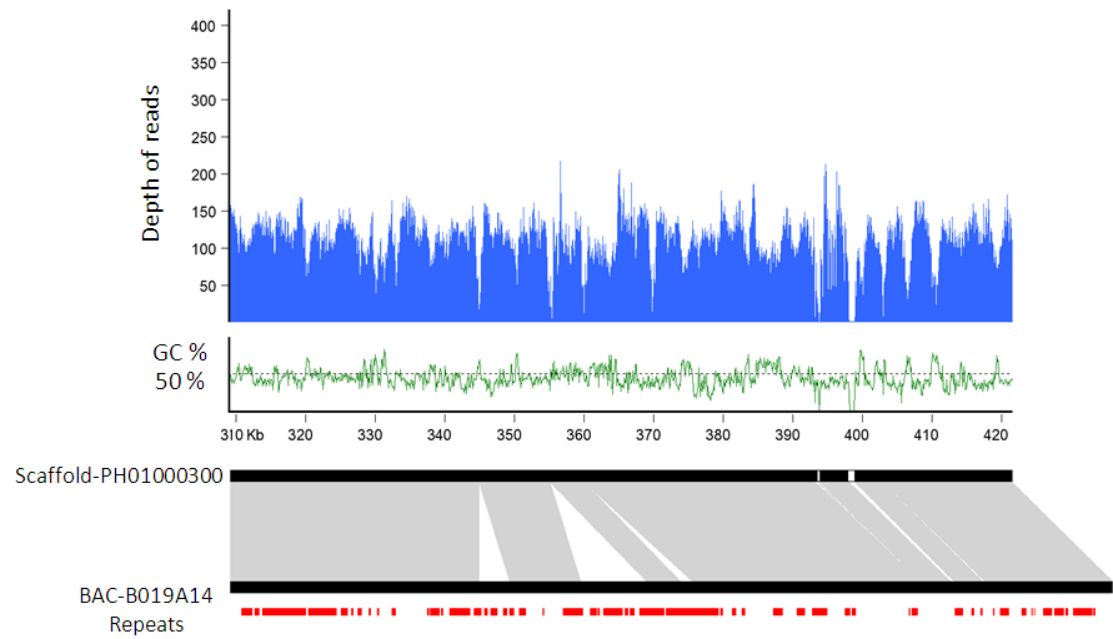



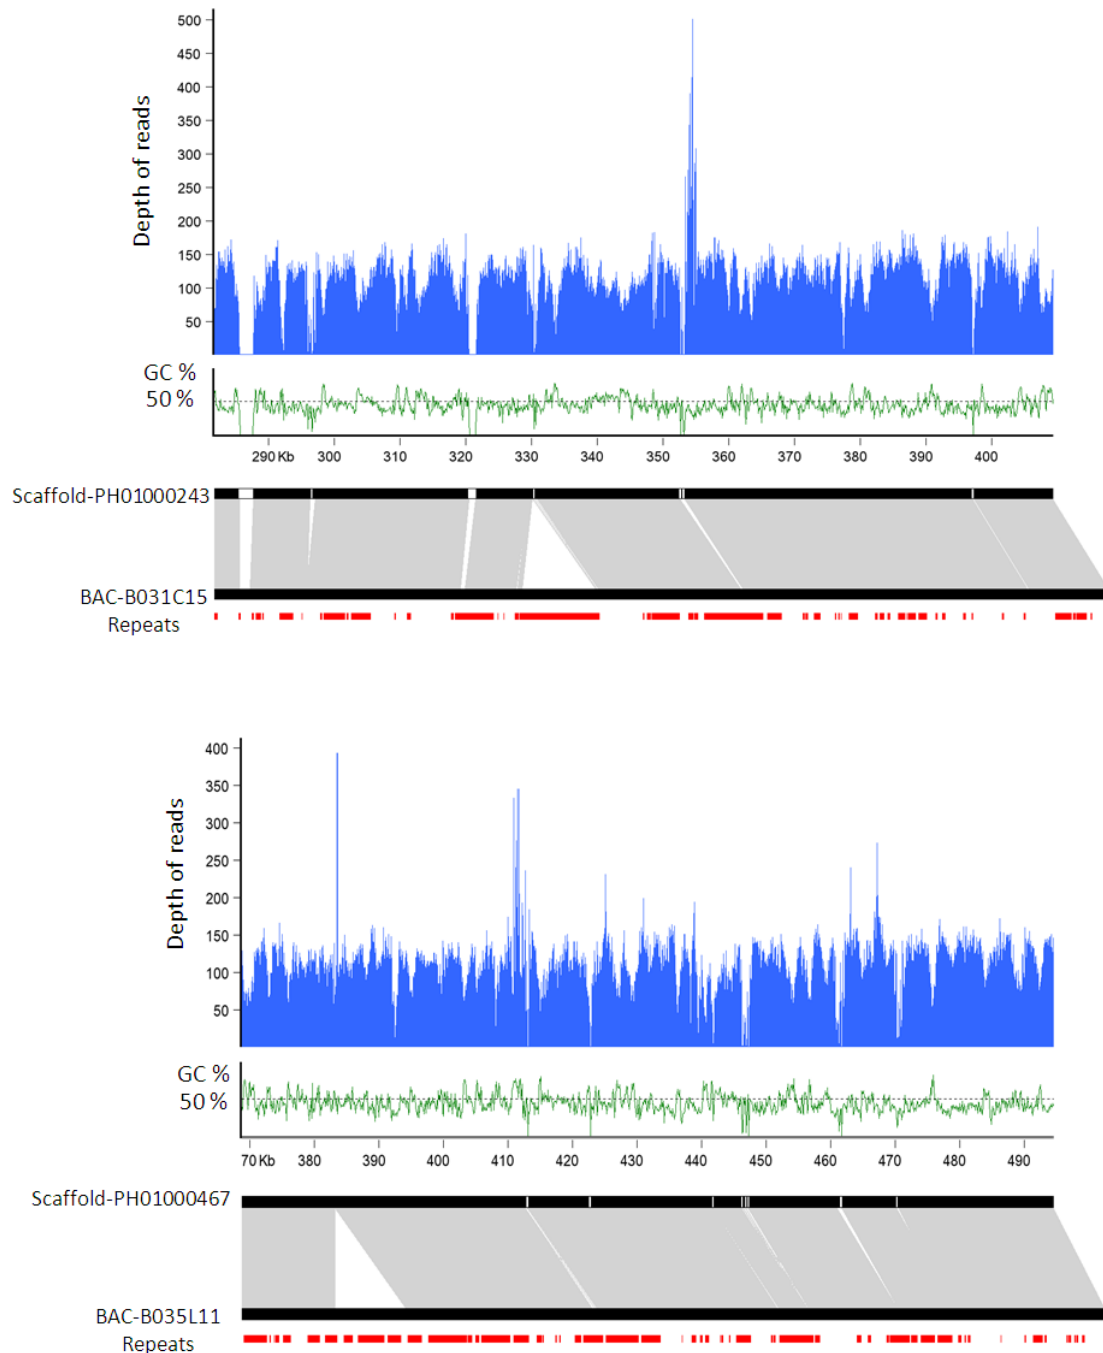

**Supplementary Figure 5** Alignment of assembled scaffolds to the BACs sequenced by Sanger method. Depth of reads in blue was calculated by mapping PE reads onto the BAC sequences. Repeats in red showed the RepeatMasker-annotated TEs on the BAC sequences. The blocks in white indicated the unfilled gaps on the scaffolds. The grey blocks showed aligned region between Sanger BACs and scaffolds. GC contents were shown in green curves.

a. Number of single-base difference

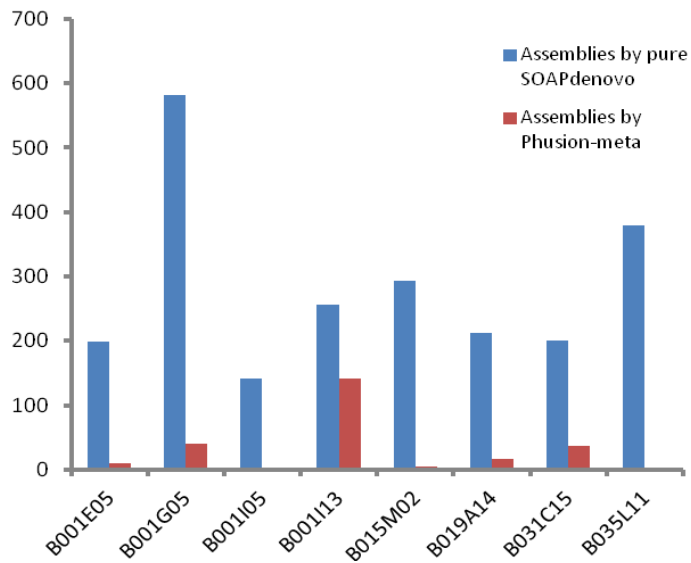

b. Number of insertion and deletion

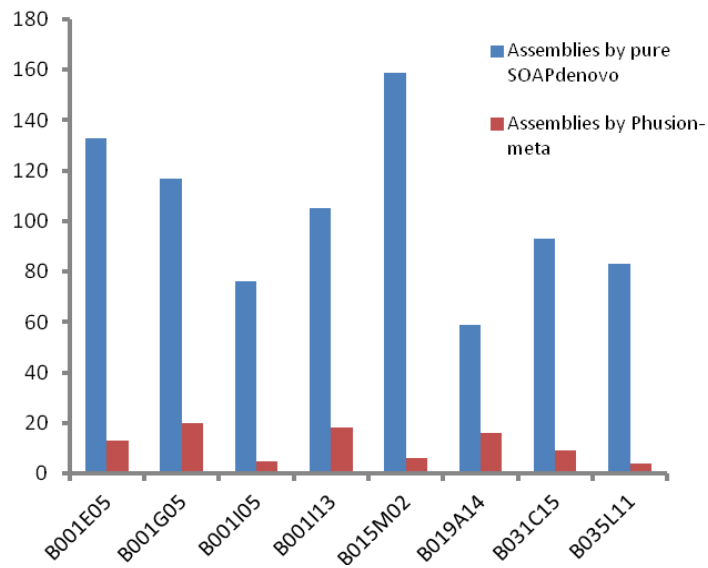

**Supplementary Figure 6** Comparison of detected assembling errors by different assembling methods.

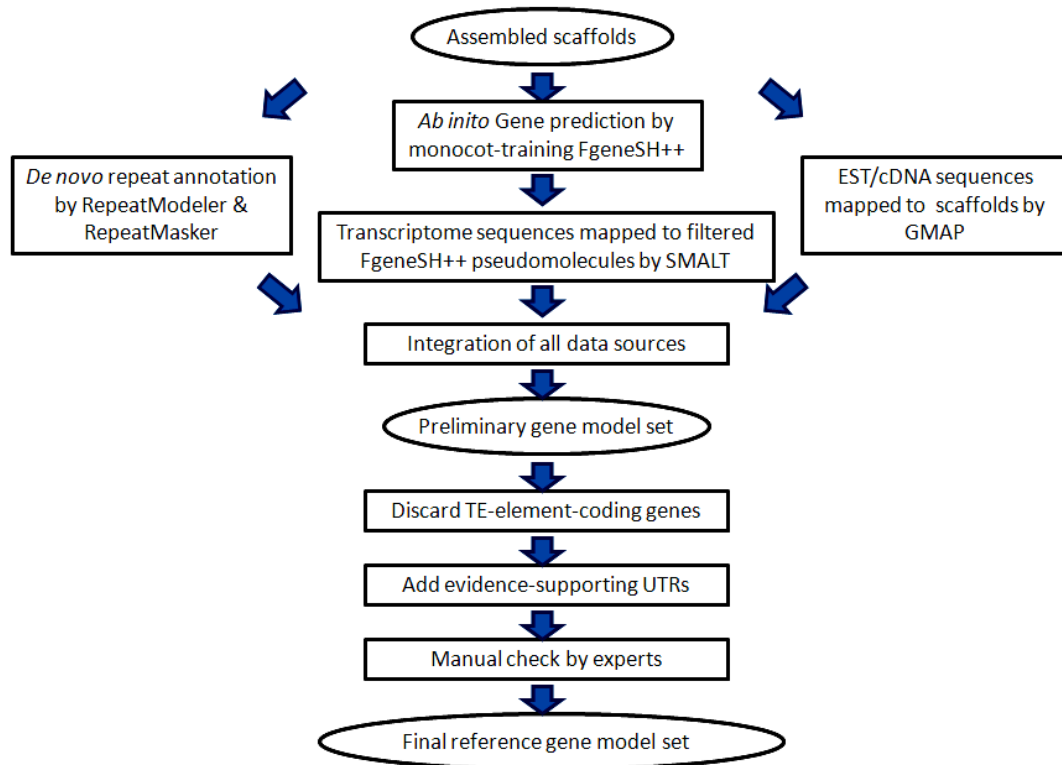

**Supplementary Figure 7** Simplified pipeline of gene prediction with the combination of *ab initio* gene prediction, mapped RNA-seq reads, and cDNA sequences. Using both RNA-seq data and 8,253 cDNA sequences, we initially detected 35,378 transcribed loci in the genome. By applying the stringent criteria to gene prediction, a total of 31,987 high-confidenced genes were finally identified in the annotation, which were in the same range as those of other grass families.

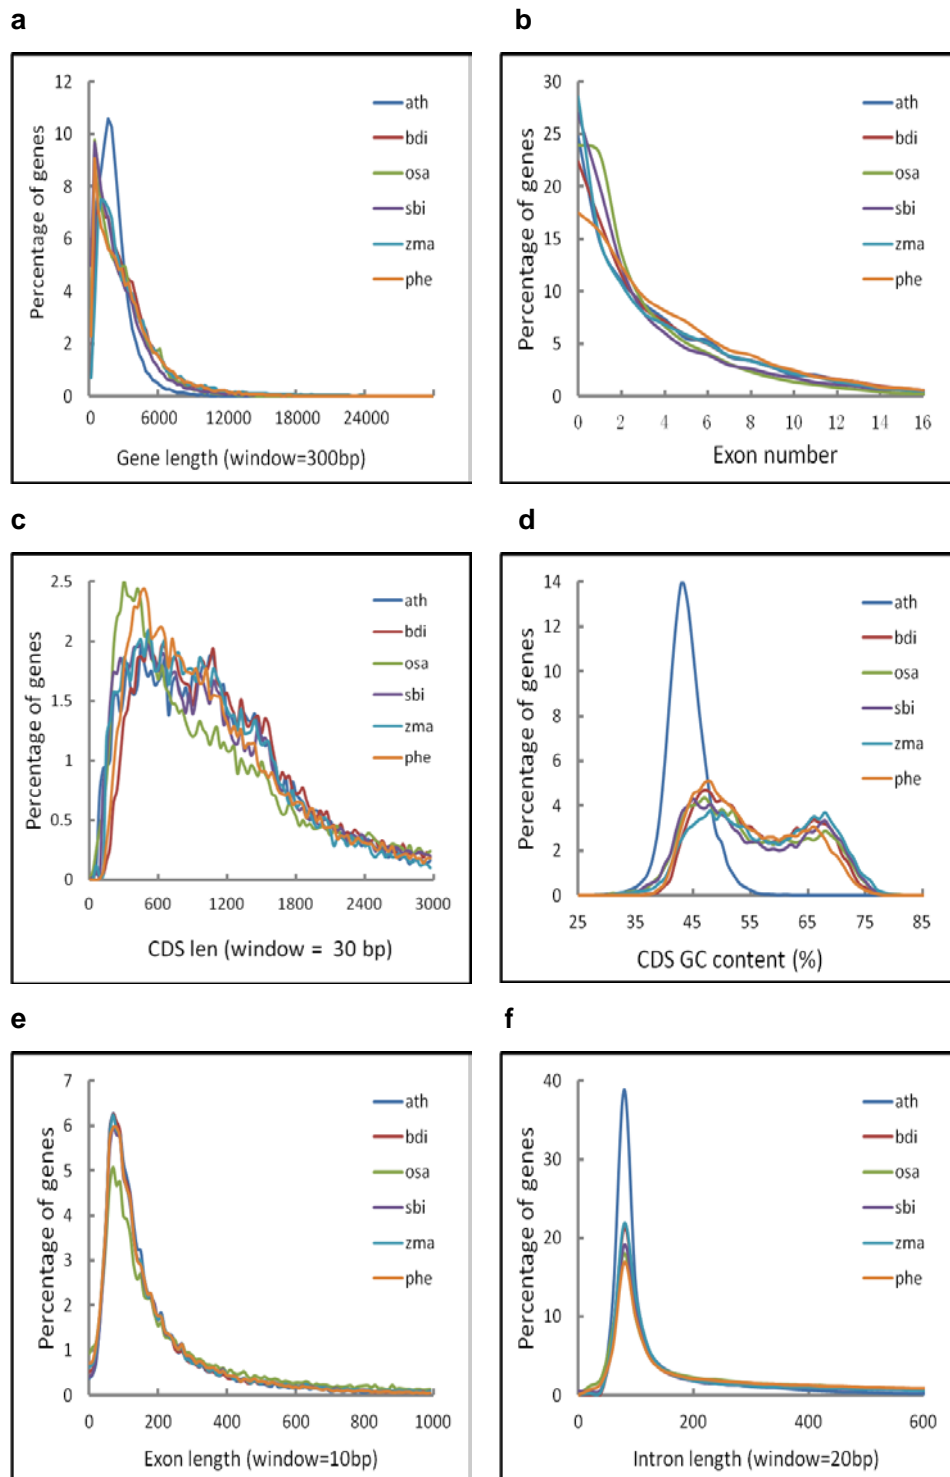

**Supplementary Figure 8** Comparison of gene parameters among fully sequenced genomes. Gene structure of the *Phyllostachys heterocycla* (phe) showed highly consistent with that of other grass species, including *Arabidopsis thaliana* (ath), *Brachypodium distachyon* (bdi), *Oryza sativa ssp. Japonica* (osa), *Sorghum bicolor* (sbi), and *Zea mays* (zma), in distribution of gene length, exon number per gene, coding sequence length, GC content in coding region, exon and intron length.

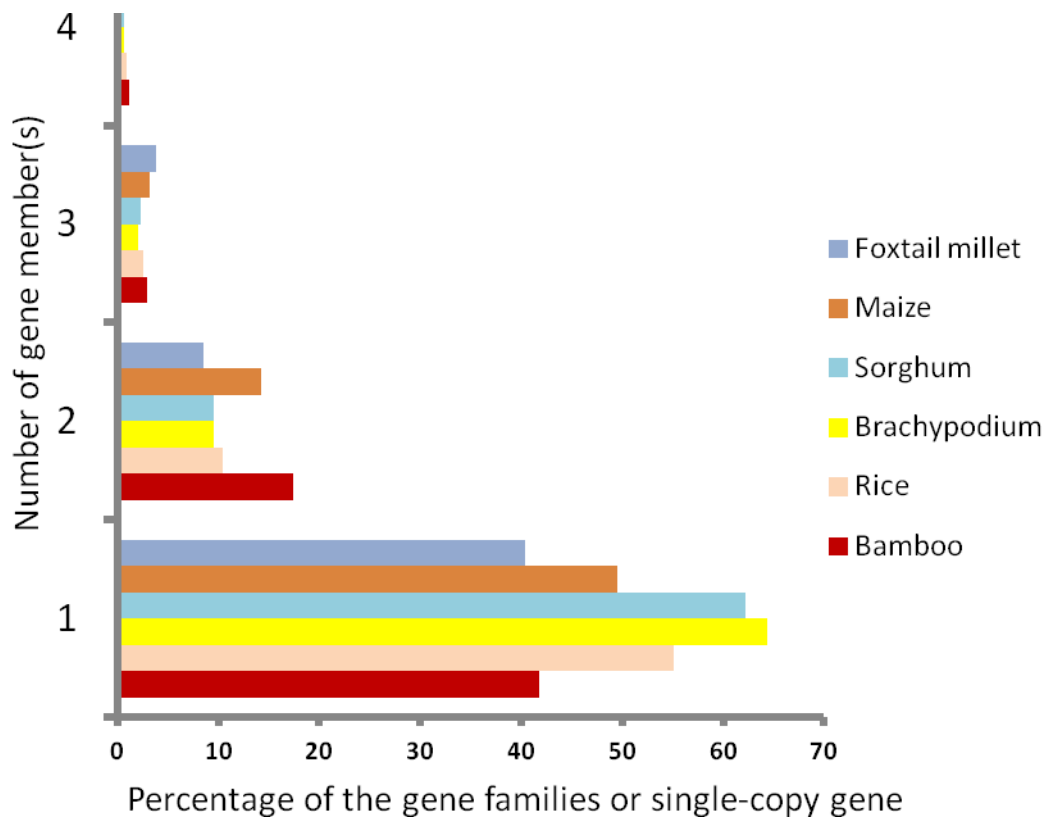

**Supplementary Figure 9** Quantitative comparison of single-copy genes and gene families consisting of 2 to 4 members among foxtail millet, maize, sorghum, Brachypodium, rice, and bamboo. The gene families and single-copy genes were categorized by OrthoMCL analysis. For the y axis, number of gene member at 1 indicated the single-copy gene and 2 to 4 meant that the gene families consisted of 2 to 4 member(s). The x axis indicated their proportion (%).

**a**

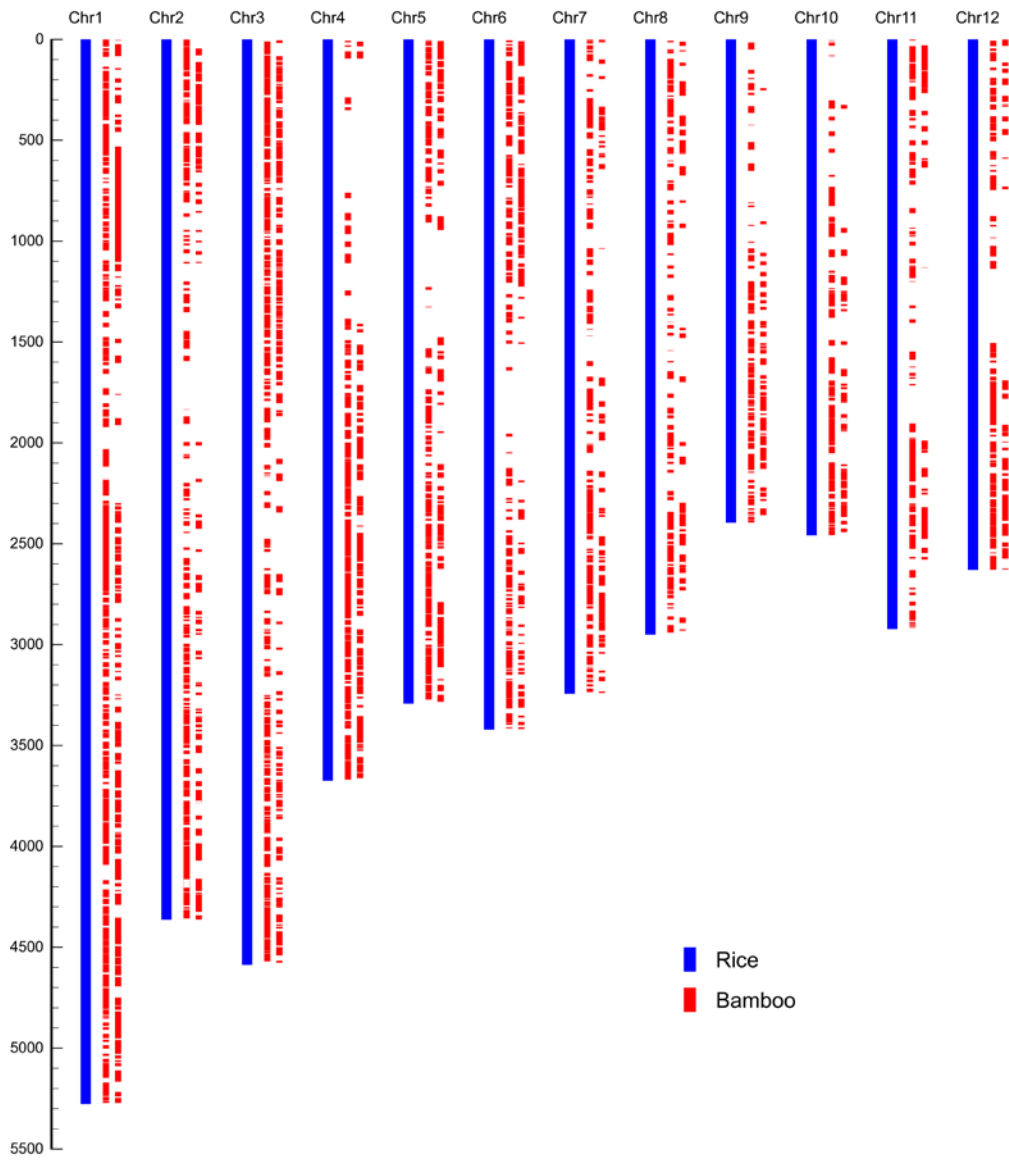

**b**

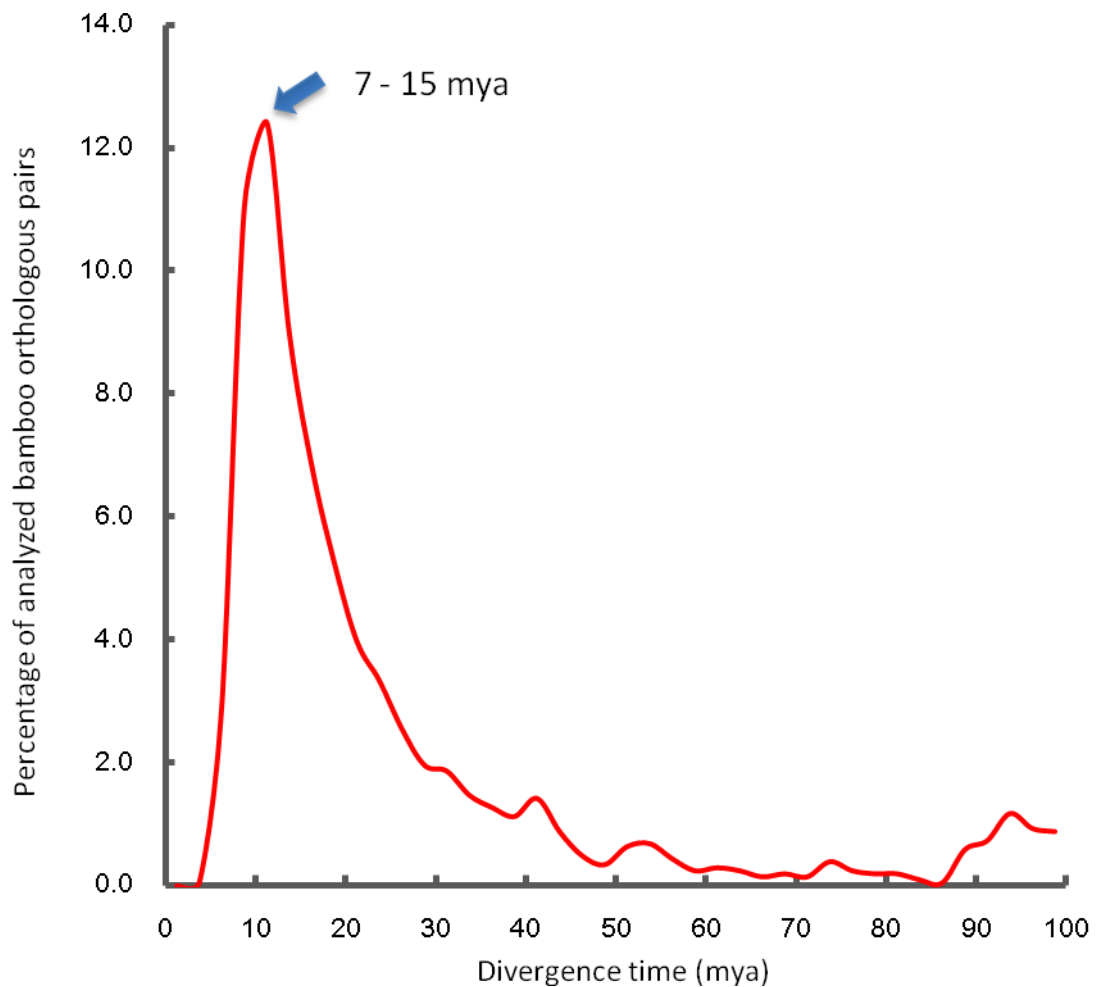

**Supplementary Figure 10** The bamboo WGD identified by analysis of gene collinearity between bamboo and rice orthologs. **(a)** Collinear gene blocks between bamboo and rice genome. The rice genes are arranged according to their gene order. Rice gene sets on different chromosomes were exhibited in blue rough lines. The ordinal number of the genes were measured by the bar in the left. The collinear gene blocks of bamboo were shown in red blocks, which implicated that moso bamboo carried nearly two duplicates of rice genome. **(b)** Estimated divergence time of bamboo orthologous pairs. Only the orthologous pairs of bamboo sharing unique rice orthologs in collinear blocks were used to estimate the divergence time. The 7 to 15 mya was the potential time when two bamboo progenitors diverged, and the WGD should occur more recent than it.

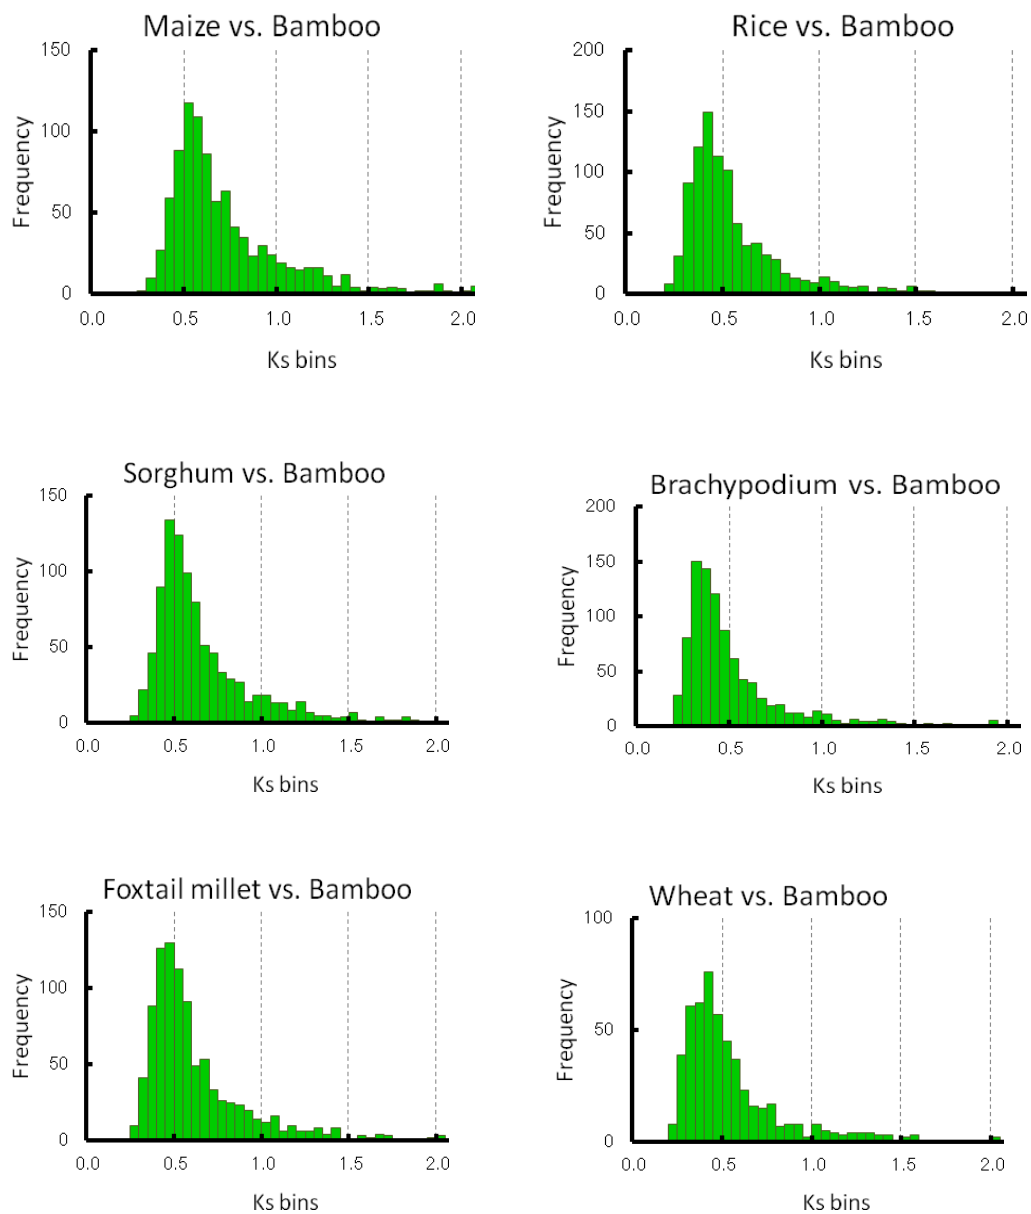

**Supplementary Figure 11** Ks distribution of orthologous genes between bamboo and grass species. The bin size of Ks value was 0.05. Frequency was quantity of the one-to-one gene clusters.



a

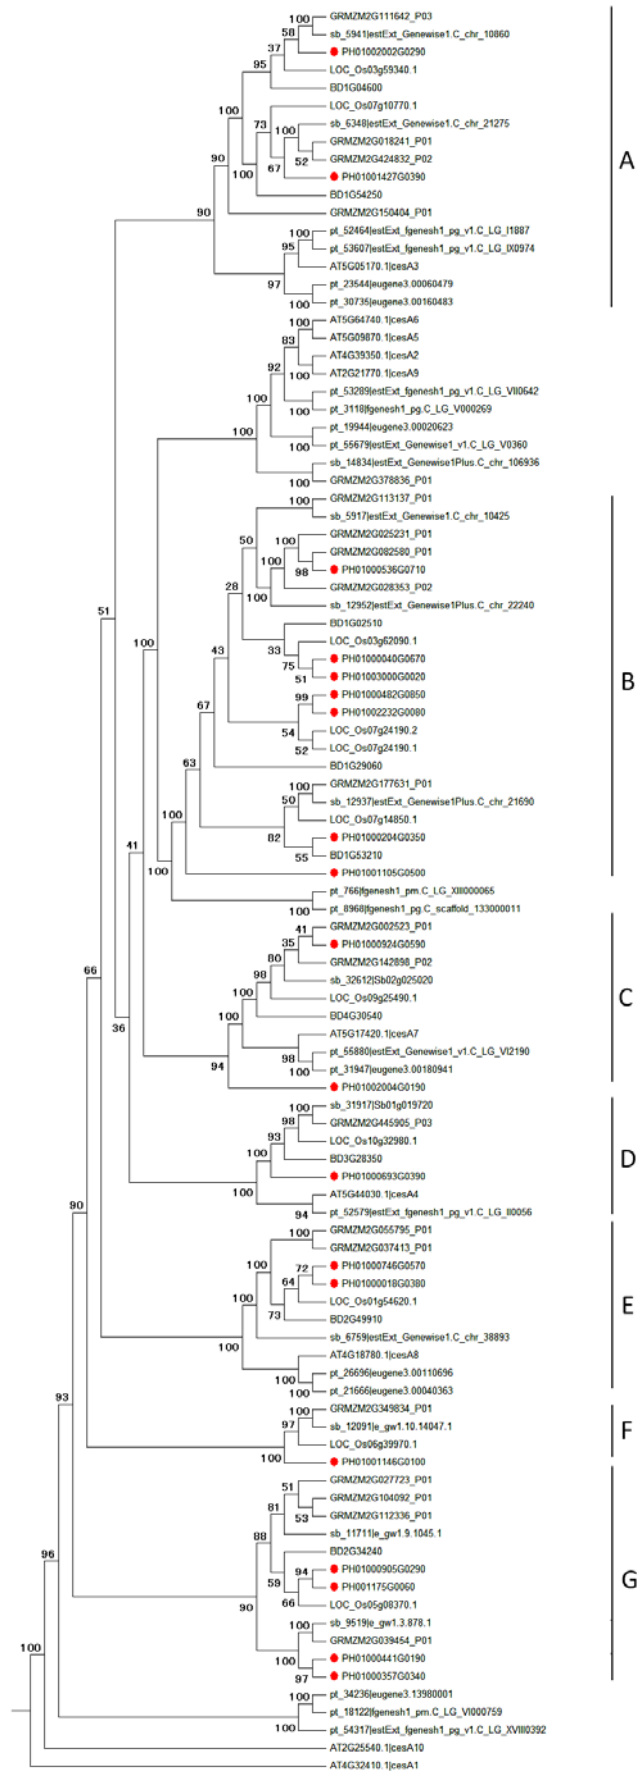

**b**

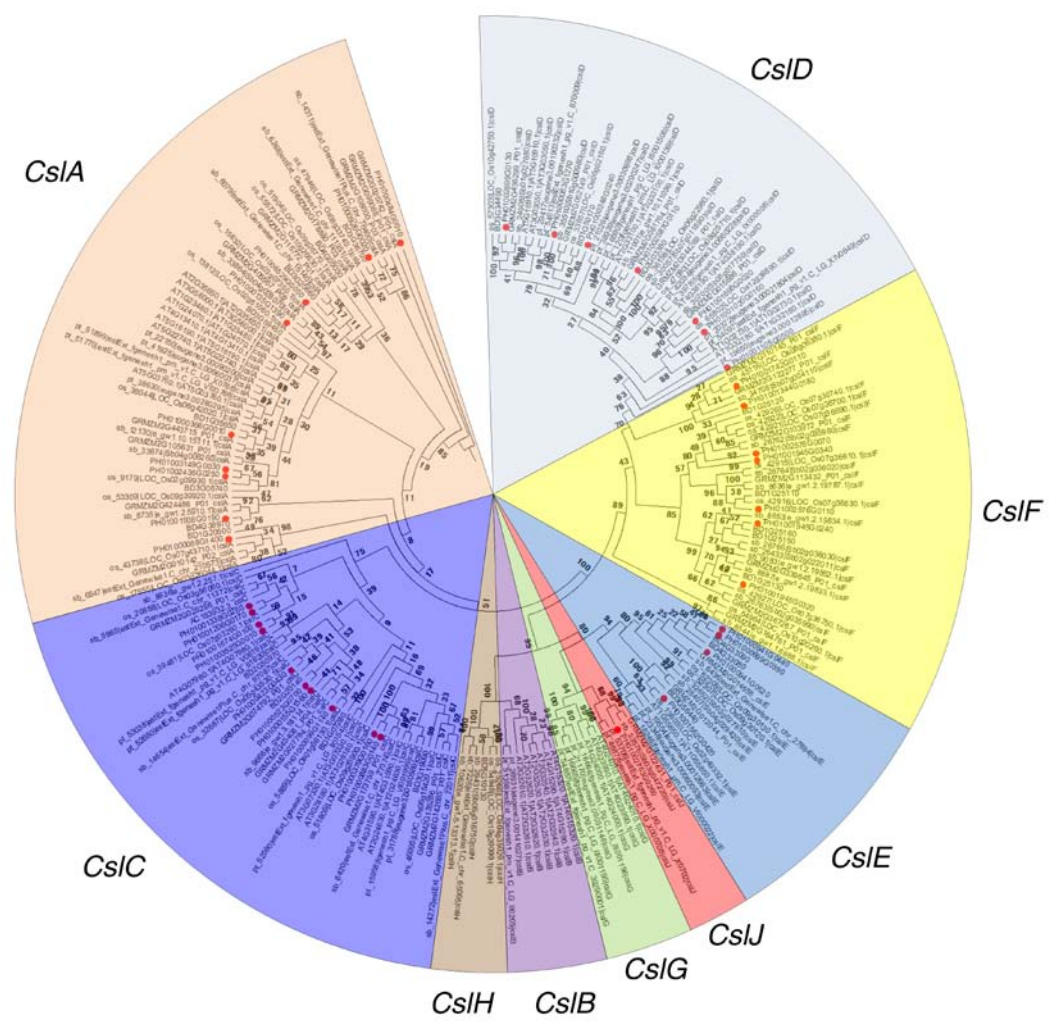

**c**

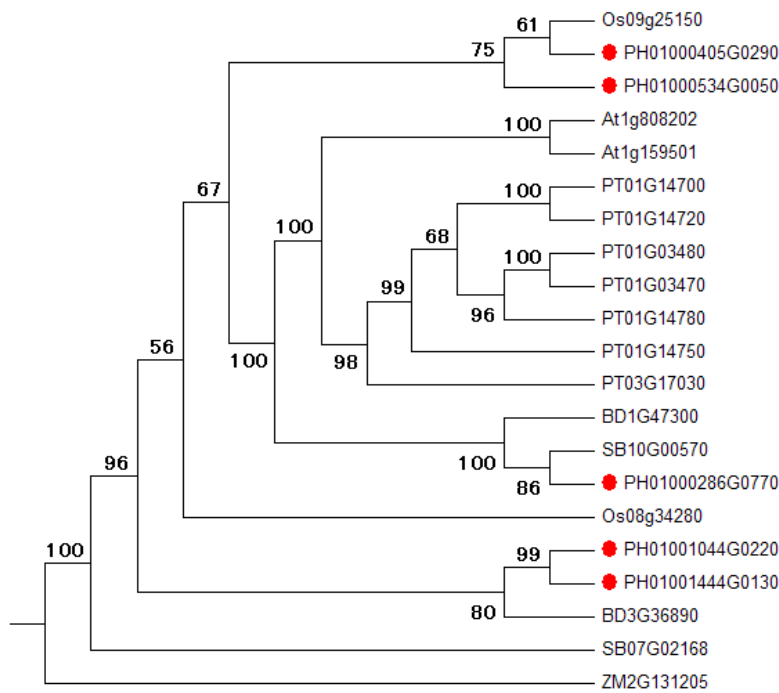

**d**

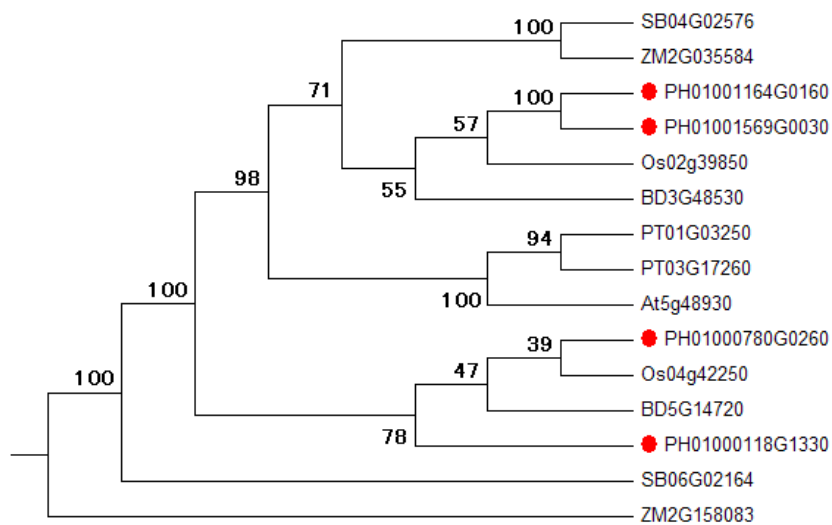

**Supplementary Figure 12** Phylogenetic tree of *CesA* and *CsI* gene families among Arabidopsis, poplar, rice, maize, sorghum, Brachypodium, and bamboo. (a) NJ tree of *CesAs*. A, B, C, D, E, F, and G indicated 7 clades where the bamboo genes were located. (b) NJ tree of *CsIs*. Different subfamilies were shown in different colors. (c) NJ tree of CCR genes. (d) NJ tree of HCT genes. The bamboo genes were labeled by red point. The numbers beside the branches were bootstrap percentage.

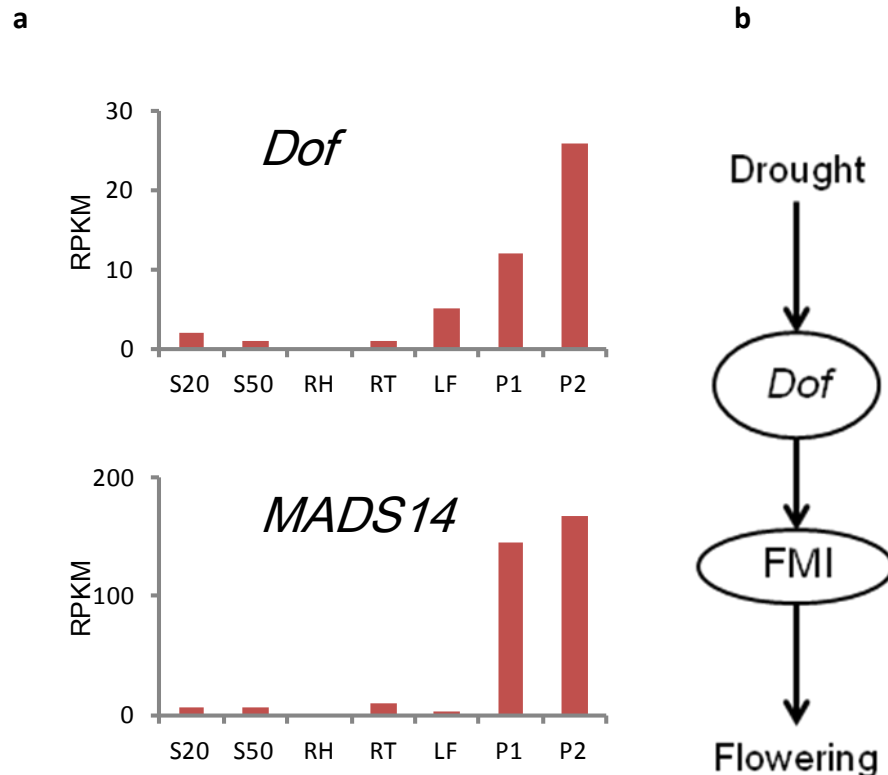

**Supplementary Figure 13** A hypothesized pathway in activation of flowering. **(a)** Quantified expression levels of bamboo *Dof* (the homolog of the *OsDof12*) and *MADS14* (one of homologs of the *OsMADS14*, involved in the FMI) in different tissues. The expression is indicated as the normalized quantified transcript levels (RPKM). **(b)** A predicted pathway in controlling of flower-time in bamboo. Of the identified floral genes, the homologs of *OsMADS14* (main text ref.30) (bamboo *MADS14s*, Identity >70%, FMI genes) were highly expressed in panicles (16- to 84-fold over vegetative tissue, Q-value < 0.001). However, the expressions of the homologs of its upstream regulatory genes, such as *OsSOC1*<sup>23</sup>, and *Ehd1*<sup>24</sup>, were not detected (**Supplementary Table 17**) except for a homolog of *OsDof12*<sup>25</sup> (bamboo *Dof*, Identity >80%, **Supplementary Table 16**) with significantly higher expression in panicles (5- to 26-fold, Q-value < 0.001), implying that the bamboo *Dof* might also be functional in regulating *MADS14s* at the flowering of bamboo. As the previous studies in rice, the *OsDof12* can be induced under long-day conditions<sup>25</sup> or drought stress<sup>26</sup>. The flowering bamboo were grown in the typical short-day growing area in Southern China where a severe drought had just occurred, suggesting that the bamboo *Dof* was likely induced by drought stress. Taken together, a pathway of drought-*Dof*-*MADS14*-flowering might be active during the flowering.

**a**

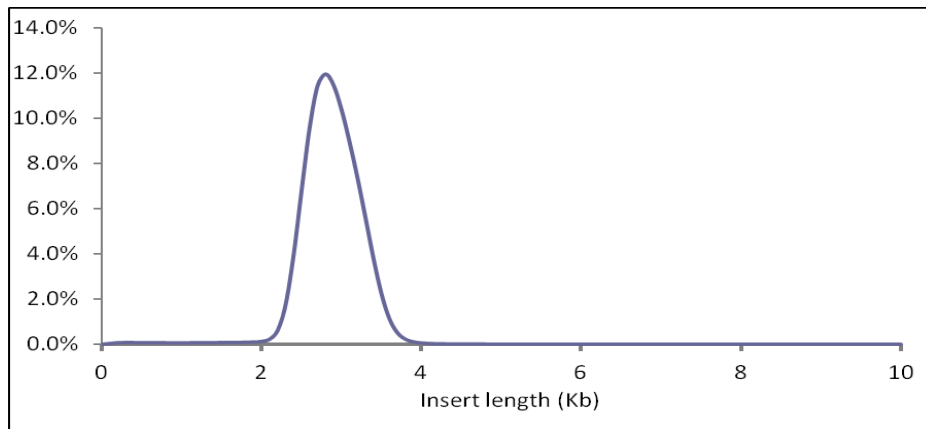

**b**

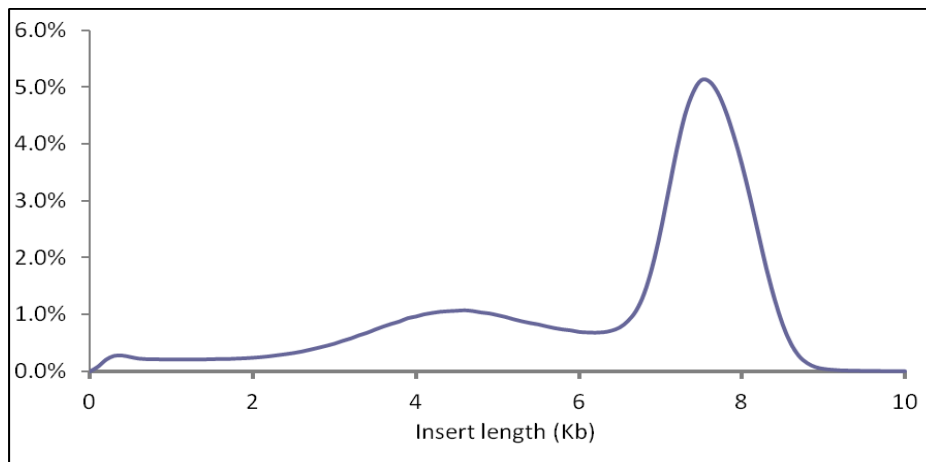

**c**

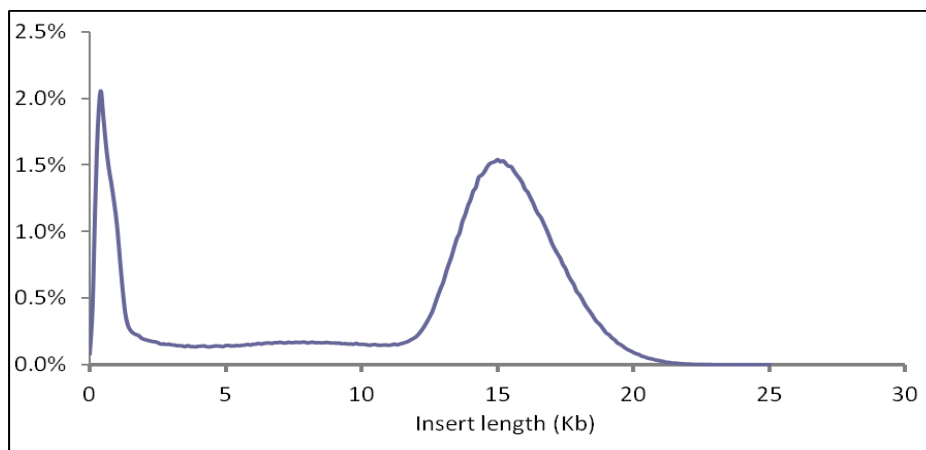

**Supplementary Figure 14** Distribution of insert sizes in paired-end sequencing libraries with inserts at around 3 to 18 Kb. **(a)** Distribution of the library with insert sizes around 3Kb. **(b)** Distribution of the library with insert sizes around 7-8 Kb. **(c)** Distribution of 16-18 Kb insert library. The insert sizes and their distribution were estimated by counting the number of read pairs located on existed initial contigs.

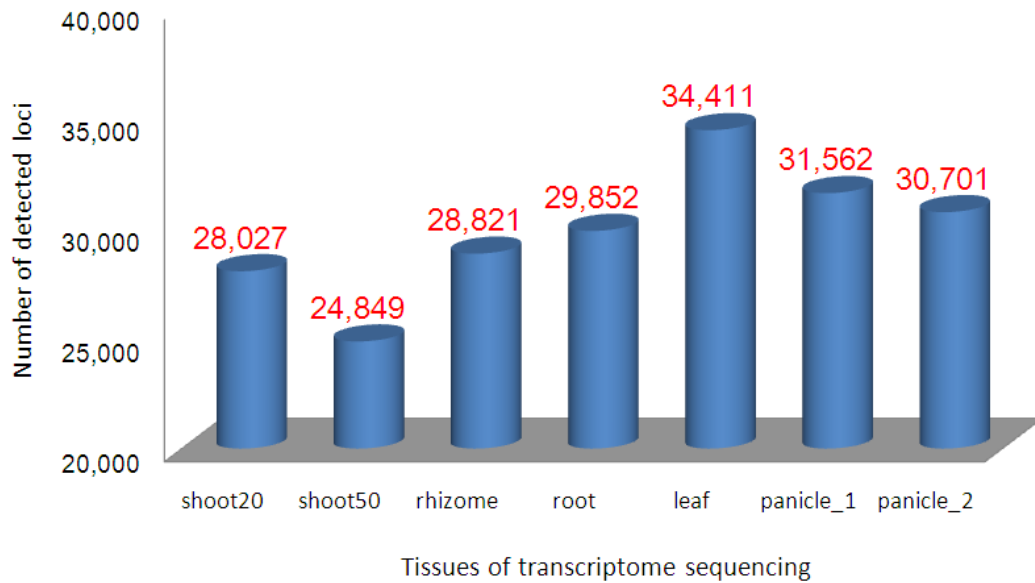

**Supplementary Figure 15** Number of detected non-TE-derived loci by transcriptome sequences from 7 different tissues, tip of 20cm-high shoot (shoot20), tip of 50cm-high shoot (shoot50), rhizome, root, leaf, panicle at early flowering stage (panicle\_1), and panicle at late flowering stage (panicle\_2). The number indicated quantity of the detected loci in corresponding tissues. Some of the detected loci were discarded in filtering of gene models, which resulted in the detected number in some tissues was more than final gene models.

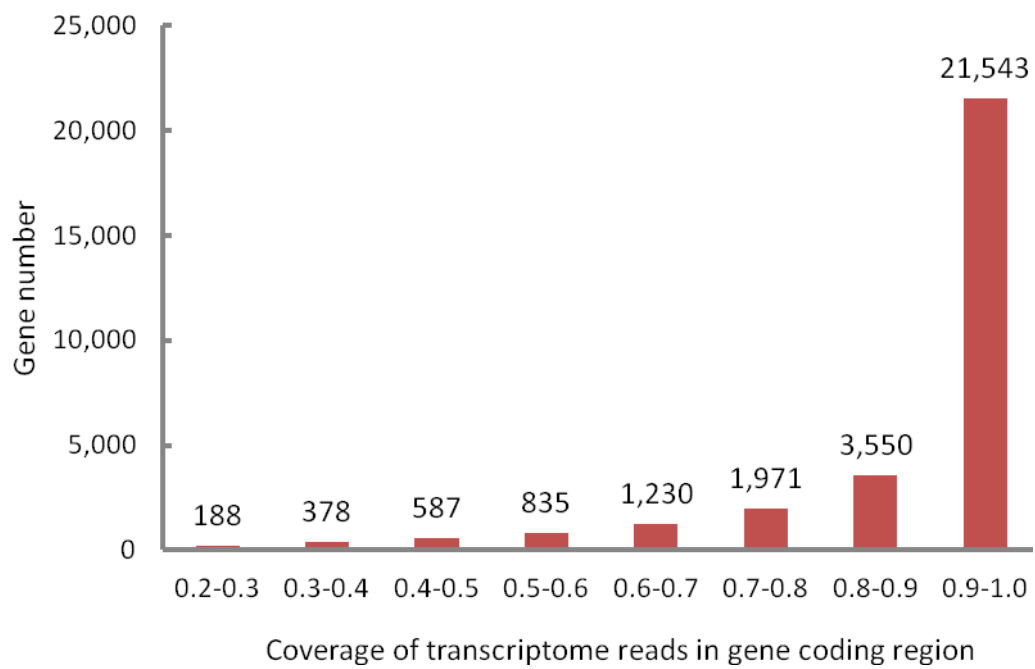

**Supplementary Figure 16** Transcriptome evidence for gene prediction in moso bamboo. A potential gene model should be supported by at least 20% coverage of transcriptome reads in gene coding region. Over 27,000 (87% of 31,987) genes' coding regions were strongly supported by transcriptome sequences.

## **Supplementary Tables**

### **Supplementary Table 1 Summary of sequence assembly.**

#### **Supplementary Table 1a Summary of the BAC-end sequences used in scaffolding**

|                                                   |                       |
|---------------------------------------------------|-----------------------|
| Quantity of BAC-ends                              | 20,654 (10,327 pairs) |
| Total length of BAC-ends                          | 18.4 Mb               |
| Genome coverage                                   | 0.66 ×                |
| Average read length                               | 890 bp                |
| Average distribution density                      | every 103 Kb          |
| Average BAC insert length                         | 140 Kb                |
| Quantity of aligned BAC-ends to the scaffolds     | 19,069                |
| Total length of aligned BAC-ends to the scaffolds | 17.3 MB (94.2%)       |
| Shared identities of BAC-ends in the scaffolds    | 96.8%                 |

#### **Supplementary Table 1b Summary of sequencing and assembly of the moso bamboo genome.**

|                         | Added paired-end<br>insert size (bp) | Sequence<br>coverage (x) | N50<br>(bp) | N80<br>(bp) | Length of<br>max. contig<br>(bp) | Total length<br>(bp) |
|-------------------------|--------------------------------------|--------------------------|-------------|-------------|----------------------------------|----------------------|
| Initial contig          |                                      |                          | 11,622      | 2,338       | 186,163                          | 1,862,588,005        |
| Scaffold 1              | 350 - 400                            | 120                      | 13,599      | 2,876       | 220,151                          | 1,915,326,230        |
|                         | 2,400 - 3,600                        | 13                       |             |             |                                  |                      |
|                         | 6,800 - 8,700                        | 12                       |             |             |                                  |                      |
| Scaffold 2 <sup>†</sup> | 13,500 - 17,500                      | 2                        | 328,698     | 62,052      | 4,869,017                        | 2,051,719,643        |
|                         | 120,000                              |                          |             |             |                                  |                      |
|                         | (10,327 pairs of<br>BAC-ends)        | 0.66                     |             |             |                                  |                      |

<sup>†</sup> Final scaffolds with less than 500 bp were excluded.



**Supplementary Table 1c Comparison of length of contigs and scaffolds assembled by different methods.**

|                            |                     |               | Assemblies by pure<br>SOAPdenovo | Assemblies by<br>Phusion-meta |
|----------------------------|---------------------|---------------|----------------------------------|-------------------------------|
| <b>Initial<br/>contigs</b> | N50                 | Length (bp)   | 5,076                            | 11,882                        |
|                            |                     | n             | 89,573                           | 42,412                        |
|                            | N80                 | Length (bp)   | 472                              | 3,582                         |
|                            |                     | n             | 412,943                          | 114,186                       |
|                            | Average length (bp) |               | 598                              | 2,088                         |
|                            | Maximum length (bp) |               | 99,128                           | 152,833                       |
| Total length (bp)          |                     | 1,837,124,999 | 1,871,331,085                    |                               |
| <b>Scaffolds</b>           | N50                 | Length (bp)   | 81,579                           | 328,698                       |
|                            |                     | n             | 6,285                            | 1,626                         |
|                            | N60                 | Length (bp)   | 55,746                           | 234,025                       |
|                            |                     | n             | 9,120                            | 2,362                         |
|                            | N70                 | Length (bp)   | 31,874                           | 149,820                       |
|                            |                     | n             | 13,550                           | 3,450                         |
|                            | N80                 | Length (bp)   | 13,996                           | 62,052                        |
|                            |                     | n             | 22,289                           | 5,499                         |
|                            | N90                 | Length (bp)   | 5,368                            | 1,733                         |
|                            |                     | n             | 43,146                           | 44,100                        |
|                            | N100                | Length (bp)   | 500                              | 500                           |
|                            |                     | n             | 172,645                          | 277,278                       |
|                            | Average length (bp) |               | 11,215                           | 7,400                         |
|                            | Maximum length (bp) |               | 767,478                          | 4,869,017                     |
|                            | Total length (bp)   |               | 1,936,298,937                    | 2,015,719,643                 |
| Genome coverage (%)        |                     | 92.2          | 97.7                             |                               |

**Supplementary Table 2 Comparison of assembled scaffolds and genomic sequences in Genbank.** The known genome sequences with the length at 2 – 40 Kb were downloaded from GenBank (Accession NO. GQ252841 - 252869). Of the downloaded sequences, gi|284434746|gb|GQ252834.1| was probably from chloroplastic DNA. Blast with E-value at less than 1e-05 was used in alignment.

| GeneBank Accession No.     | Length (bp) | Coverage of all matches | Coverage of single best match | GeneBank Accession No.     | Length (bp) | Coverage of all matches | Coverage of single best match |
|----------------------------|-------------|-------------------------|-------------------------------|----------------------------|-------------|-------------------------|-------------------------------|
| gi 284434480 gb GQ252796.1 | 6,939       | 0.96                    | 0.85                          | gi 284434609 gb GQ252853.1 | 3,345       | 0.99                    | 0.99                          |
| gi 284434482 gb GQ252797.1 | 31,231      | 0.99                    | 0.99                          | gi 284434611 gb GQ252854.1 | 8,050       | 0.99                    | 0.99                          |
| gi 284434487 gb GQ252799.1 | 6,445       | 0.98                    | 0.94                          | gi 284434613 gb GQ252855.1 | 4,129       | 0.90                    | 0.90                          |
| gi 284434489 gb GQ252800.1 | 7,811       | 0.99                    | 0.99                          | gi 284434615 gb GQ252856.1 | 2,858       | 0.99                    | 0.99                          |
| gi 284434492 gb GQ252801.1 | 6,410       | 0.99                    | 0.99                          | gi 284434617 gb GQ252857.1 | 5,290       | 0.99                    | 0.99                          |
| gi 284434494 gb GQ252802.1 | 4,037       | 0.99                    | 0.99                          | gi 284434619 gb GQ252858.1 | 26,484      | 0.99                    | 0.99                          |
| gi 284434496 gb GQ252803.1 | 23,256      | 0.99                    | 0.98                          | gi 284434622 gb GQ252859.1 | 22,895      | 0.98                    | 0.95                          |
| gi 284434500 gb GQ252805.1 | 24,578      | 0.99                    | 0.98                          | gi 284434629 gb GQ252860.1 | 7,028       | 0.99                    | 0.99                          |
| gi 284434507 gb GQ252806.1 | 3,794       | 0.99                    | 0.99                          | gi 284434631 gb GQ252862.1 | 15,053      | 0.99                    | 0.98                          |
| gi 284434509 gb GQ252807.1 | 13,227      | 0.99                    | 0.99                          | gi 284434635 gb GQ252863.1 | 8,067       | 0.98                    | 0.98                          |
| gi 284434511 gb GQ252809.1 | 6,059       | 0.99                    | 0.99                          | gi 284434637 gb GQ252864.1 | 11,009      | 0.99                    | 0.96                          |
| gi 284434513 gb GQ252810.1 | 6,189       | 0.98                    | 0.88                          | gi 284434642 gb GQ252865.1 | 8,200       | 0.96                    | 0.83                          |
| gi 284434516 gb GQ252812.1 | 9,531       | 0.99                    | 0.99                          | gi 284434644 gb GQ252866.1 | 5,680       | 0.99                    | 0.99                          |
| gi 284434519 gb GQ252813.1 | 5,709       | 0.99                    | 0.99                          | gi 284434647 gb GQ252867.1 | 5,306       | 0.99                    | 0.99                          |
| gi 284434522 gb GQ252814.1 | 9,927       | 0.99                    | 0.99                          | gi 284434649 gb GQ252868.1 | 25,304      | 0.96                    | 0.72                          |
| gi 284434524 gb GQ252815.1 | 8,244       | 0.99                    | 0.99                          | gi 284434653 gb GQ252869.1 | 42,561      | 0.97                    | 0.50                          |
| gi 284434527 gb GQ252816.1 | 18,487      | 0.99                    | 0.99                          | gi 284434660 gb GQ252870.1 | 11,864      | 0.99                    | 0.90                          |
| gi 284434533 gb GQ252818.1 | 16,728      | 0.99                    | 0.95                          | gi 284434663 gb GQ252871.1 | 9,881       | 0.96                    | 0.55                          |
| gi 284434536 gb GQ252819.1 | 13,505      | 0.99                    | 0.99                          | gi 284434666 gb GQ252872.1 | 11,757      | 0.99                    | 0.99                          |
| gi 284434539 gb GQ252821.1 | 3,102       | 0.94                    | 0.79                          | gi 284434668 gb GQ252873.1 | 8,127       | 0.98                    | 0.97                          |
| gi 284434541 gb GQ252822.1 | 10,294      | 0.99                    | 0.99                          | gi 284434671 gb GQ252874.1 | 20,132      | 0.96                    | 0.68                          |
| gi 284434543 gb GQ252823.1 | 14,582      | 0.99                    | 0.97                          | gi 284434676 gb GQ252875.1 | 18,539      | 0.97                    | 0.53                          |
| gi 284434547 gb GQ252824.1 | 7,262       | 0.98                    | 0.93                          | gi 284434678 gb GQ252876.1 | 10,060      | 0.99                    | 0.99                          |
| gi 284434549 gb GQ252825.1 | 11,647      | 0.99                    | 0.99                          | gi 284434681 gb GQ252877.1 | 7,687       | 0.99                    | 0.99                          |
| gi 284434551 gb GQ252826.1 | 21,041      | 0.99                    | 0.99                          | gi 284434684 gb GQ252879.1 | 13,424      | 0.99                    | 0.86                          |
| gi 284434557 gb GQ252827.1 | 21,656      | 0.99                    | 0.84                          | gi 284434687 gb GQ252881.1 | 31,459      | 0.99                    | 0.99                          |
| gi 284434561 gb GQ252828.1 | 3,905       | 0.99                    | 0.99                          | gi 284434694 gb GQ252882.1 | 5,403       | 0.99                    | 0.98                          |
| gi 284434563 gb GQ252829.1 | 5,314       | 0.93                    | 0.84                          | gi 284434697 gb GQ252884.1 | 5,338       | 0.99                    | 0.97                          |
| gi 284434565 gb GQ252830.1 | 6,685       | 0.99                    | 0.99                          | gi 284434699 gb GQ252885.1 | 3,379       | 0.89                    | 0.82                          |
| gi 284434568 gb GQ252831.1 | 5,688       | 0.99                    | 0.99                          | gi 284434740 gb GQ252798.1 | 3,880       | 0.98                    | 0.90                          |
| gi 284434570 gb GQ252832.1 | 10,633      | 0.99                    | 0.99                          | gi 284434741 gb GQ252804.1 | 12,042      | 0.99                    | 0.99                          |
| gi 284434572 gb GQ252833.1 | 10,037      | 0.99                    | 0.94                          | gi 284434742 gb GQ252808.1 | 4,347       | 0.98                    | 0.95                          |
| gi 284434574 gb GQ252836.1 | 17,988      | 0.99                    | 0.98                          | gi 284434743 gb GQ252811.1 | 4,920       | 0.99                    | 0.99                          |

|                            |                |             |             |                            |       |      |      |
|----------------------------|----------------|-------------|-------------|----------------------------|-------|------|------|
| gij284434580 gb GQ252837.1 | 3,610          | 0.99        | 0.99        | gij284434744 gb GQ252817.1 | 4,026 | 0.99 | 0.99 |
| gij284434582 gb GQ252838.1 | 3,803          | 0.99        | 0.97        | gij284434745 gb GQ252820.1 | 3,125 | 0.99 | 0.80 |
| gij284434584 gb GQ252839.1 | 6,741          | 0.99        | 0.99        | gij284434746 gb GQ252834.1 | 3,233 | 0.33 | 0.23 |
| gij284434586 gb GQ252840.1 | 9,734          | 0.94        | 0.92        | gij284434747 gb GQ252835.1 | 3,415 | 0.99 | 0.99 |
| gij284434589 gb GQ252841.1 | 2,050          | 0.99        | 0.99        | gij284434748 gb GQ252844.1 | 4,285 | 0.99 | 0.97 |
| gij284434591 gb GQ252842.1 | 7,689          | 0.99        | 0.99        | gij284434749 gb GQ252846.1 | 3,882 | 0.99 | 0.98 |
| gij284434594 gb GQ252843.1 | 7,973          | 0.99        | 0.99        | gij284434750 gb GQ252849.1 | 2,512 | 0.99 | 0.99 |
| gij284434596 gb GQ252845.1 | 2,750          | 0.99        | 0.86        | gij284434751 gb GQ252851.1 | 6,882 | 0.99 | 0.99 |
| gij284434598 gb GQ252847.1 | 19,143         | 0.98        | 0.98        | gij284434752 gb GQ252861.1 | 5,083 | 0.99 | 0.99 |
| gij284434602 gb GQ252848.1 | 3,363          | 0.99        | 0.86        | gij284434753 gb GQ252878.1 | 3,917 | 0.98 | 0.97 |
| gij284434604 gb GQ252850.1 | 14,653         | 0.99        | 0.99        | gij284434754 gb GQ252880.1 | 2,894 | 0.99 | 0.99 |
| gij284434607 gb GQ252852.1 | 6,356          | 0.99        | 0.99        | gij284434755 gb GQ252883.1 | 3,085 | 0.99 | 0.99 |
| <b>Sum</b>                 | <b>429,837</b> | <b>0.98</b> | <b>0.91</b> |                            |       |      |      |

**Supplementary Table 3 Comparison of assembled scaffolds and 18 available genes' mRNA/coding sequences in the public database.** The mRNA and coding sequences were downloaded from GenBank. Poly(A) sequences at the end of mRNA were removed anterior to the alignment. Alignment indicated that most of the unmatched bases were located at the end of the GenBank genes, which were probably introduced by DNA amplification using homologous genes' primers of different species.

| GenBank Accession No.      | Length (bp) | Coverage of all matches | Coverage of single best match | Identities in aligned region | Description                                 |
|----------------------------|-------------|-------------------------|-------------------------------|------------------------------|---------------------------------------------|
| gi 145845825 gb EF549577.1 | 1,035       | 0.960                   | 0.884                         | 0.960                        | cinnamyl alcohol dehydrogenase              |
| gi 145845829 gb EF549579.1 | 801         | 0.983                   | 0.983                         | 0.997                        | caffeoyl-CoA O-methyltransferase            |
| gi 162568699 gb EU295482.1 | 1,130       | 0.983                   | 0.947                         | 0.998                        | DRE-binding protein DREB2 (DREB2)           |
| gi 169743367 gb EU366146.1 | 1,060       | 0.983                   | 0.983                         | 0.993                        | chloroplast chlorophyll a/b binding protein |
| gi 169743369 gb EU366147.1 | 1,141       | 0.976                   | 0.976                         | 0.990                        | chloroplast chlorophyll a/b binding protein |
| gi 175050407 gb EF549578.2 | 2,302       | 0.984                   | 0.984                         | 0.894                        | phenylalanine ammonia-lyase                 |
| gi 190694830 gb EU780143.1 | 554         | 0.978                   | 0.978                         | 0.994                        | chloroplast chlorophyll a/b binding protein |
| gi 195546525 gb EU860441.1 | 1,224       | 0.984                   | 0.984                         | 0.998                        | DRE-binding protein DREB1 (DREB1)           |
| gi 222154090 gb FJ594467.1 | 2,171       | 0.985                   | 0.985                         | 0.949                        | phenylalanine ammonia-lyase (PAL1)          |
| gi 222154092 gb FJ594468.1 | 2,294       | 0.985                   | 0.985                         | 0.942                        | phenylalanine ammonia-lyase (PAL1)          |
| gi 237506882 gb FJ495287.1 | 3,293       | 0.985                   | 0.985                         | 0.998                        | cellulose synthase (cesA1)                  |
| gi 251766020 gb FJ475350.1 | 3,262       | 0.985                   | 0.985                         | 1.000                        | cellulose synthase (CesA2)                  |
| gi 251766022 gb FJ475351.1 | 3,306       | 0.978                   | 0.978                         | 0.986                        | cellulose synthase (CesA4)                  |
| gi 255764546 gb FJ600727.1 | 824         | 0.983                   | 0.983                         | 0.999                        | PsbS protein                                |
| gi 294818264 gb GU944762.1 | 590         | 0.981                   | 0.981                         | 0.997                        | putative pathogenesis protein (WRKY10)      |
| gi 301071262 gb GU434145.1 | 1,245       | 0.979                   | 0.979                         | 0.997                        | Actin                                       |
| gi 312232178 gb HM747940.1 | 1,770       | 0.985                   | 0.985                         | 0.980                        | MYB protein                                 |
| gi 312232180 gb HM747941.1 | 739         | 0.943                   | 0.943                         | 0.978                        | VAH protein                                 |
| Sum                        | 28,741      | 0.981                   | 0.976                         | 0.981                        |                                             |

**Supplementary Table 4 Comparison of the assembled scaffolds 8 independently sequenced Sanger BACs.** The assemblies were aligned to the BACs using an aligner MUMmer<sup>27</sup> and Blastn with 98% or more identity. The difference of single-base and insertion/deletion in each aligned block was counted by manual checked. Content of TE-element were estimate by running RepeatMasker against constructed bamboo repetitive sequence library.

| BAC ID  | TE %  | Length of BAC (bp) | Coverage by initial contigs (%) | Coverage by scaffolds (%) | # of single-base difference | # of insertion and deletion | Average read depth on scaffold | Rate of single-base difference (per Kb) |
|---------|-------|--------------------|---------------------------------|---------------------------|-----------------------------|-----------------------------|--------------------------------|-----------------------------------------|
| B001E05 | 69.30 | 96,839             | 95.72                           | 100.00                    | 9                           | 13                          | 106                            | 0.09                                    |
| B001G05 | 74.11 | 167,736            | 75.35                           | 92.43                     | 41                          | 20                          | 132                            | 0.29                                    |
| B001I05 | 46.26 | 126,170            | 93.64                           | 99.99                     | 2                           | 5                           | 113                            | 0.02                                    |
| B001I13 | 49.65 | 166,343            | 88.97                           | 100.00                    | 142                         | 18                          | 114                            | 0.85                                    |
| B015M02 | 41.36 | 113,962            | 99.20                           | 100.00                    | 5                           | 6                           | 127                            | 0.04                                    |
| B019A14 | 45.04 | 126,859            | 85.49                           | 100.00                    | 16                          | 16                          | 112                            | 0.13                                    |
| B031C15 | 43.67 | 136,024            | 88.13                           | 100.00                    | 37                          | 9                           | 117                            | 0.27                                    |
| B035L11 | 49.83 | 133,794            | 90.71                           | 100.00                    | 3                           | 4                           | 105                            | 0.02                                    |
| Average | 52.70 | 133,466            | 88.78                           | 98.81                     | 31.9                        | 11.4                        | 116                            | 0.19                                    |

**Supplementary Table 5 Comparison of detected assembling errors by different methods.**

|                                           | <b>Assemblies by pure<br/>SOAPdenovo</b> | <b>Assemblies by<br/>Phusion-meta</b> |
|-------------------------------------------|------------------------------------------|---------------------------------------|
| Rate of single-base difference (# per Kb) | 2.27                                     | 0.19                                  |
| Rate of insertion and deletion (# per Kb) | 0.83                                     | 0.09                                  |
| Coverage by initial contigs               | 0.80                                     | 0.89                                  |
| Coverage by supercontigs                  | 0.93                                     | 0.99                                  |

**Supplementary Table 6 Statistics of heterozygous polymorphisms.** The potential sites of SNPs and short indels were detected by unique read coverage in genic and intergenic regions.

| Source            | Quantity of heterozygous loci |           |             | Size of analyzed sequences (bp) | heterozygous rate ( $\times 10^{-3}$ ) |
|-------------------|-------------------------------|-----------|-------------|---------------------------------|----------------------------------------|
|                   | Short indel                   | SNP       | Indel + SNP |                                 |                                        |
| gene region       | 6,818                         | 92,068    | 98,886      | 115,641,313                     | 0.85                                   |
| Intergenic region | 44,405                        | 1,917,419 | 1,961,824   | 1,936,078,330                   | 1.01                                   |
| Total             | 51,223                        | 2,009,487 | 2,060,710   | 2,051,719,643                   | 1.00                                   |

**Supplementary Table 7 Overview of gene prediction in some fully sequenced higher plants.**

| Organism                   | Sorghum             | Maize                    | Rice   | Brachypodium        | Poplar           | Arabidopsis | Foxtail millet | Bamboo                                     |
|----------------------------|---------------------|--------------------------|--------|---------------------|------------------|-------------|----------------|--------------------------------------------|
| Assembly size (Mb)         | 730                 | 2,300                    | 382    | 272                 | 385              | 125         | 401            | <b>2,051</b>                               |
| Transposable element       | 0.62                | 0.842                    | 0.4    | 0.281               | 0.374            | 0.14        | 0.4            | <b>0.60</b>                                |
| Gene number                | 27,640              | 32,540                   | 34,792 | 25,532              | 45,555           | 25,498      | 35,472         | <b>31,987</b>                              |
| Average gene length (bp)   | 2,873 (without UTR) | 3,757                    | 3,039  | 2,956 (without UTR) | 2,300            | 2,011       | 987 (CDS)      | <b>3,350 (without UTR)<br/>1,213 (CDS)</b> |
| Gene density (kb/gene)     | 24                  | 13.1 (non-repeat region) | 11.0   | 10.7                | 8.5              | 4.5         | 11.3           | <b>64.1</b>                                |
| Average exon # per gene    | 4.7                 | 5.3                      | 3.7    | 5.5                 | 4.3              | 5.2         | 4.5            | <b>5.3</b>                                 |
| Average exon len (bp)      | 268                 | 304                      | 256    | 268                 | 254              | 250         | 163 (median)   | <b>227</b>                                 |
| Average intron length (bp) | 436                 | 516                      | 409    | 391                 | 379              | 168         | 135 (median)   | <b>492</b>                                 |
| Reference                  | Main text Ref.36    | Main text Ref.26         | 28     | 10                  | Main text Ref.11 | 14          | 29             | This study                                 |



**Supplementary Table 8 Pathway similarity between bamboo and selected grass genomes.**

| Entry ID | Class of pathway                                    | P.he vs. O.sa |       |             | P.he vs. S.bi |       |             | P.he vs. Z.ma |       |             |
|----------|-----------------------------------------------------|---------------|-------|-------------|---------------|-------|-------------|---------------|-------|-------------|
|          |                                                     | O. sa         | P.h e | Simila rity | S. bi         | P.h e | Simila rity | Z. ma         | P.h e | Simila rity |
| KO00010  | Glycolysis / Gluconeogenesis                        | 91            | 123   | 0.929       | 66            | 62    | 0.818       | 85            | 100   | 0.840       |
| KO00020  | Citrate cycle (TCA cycle)                           | 48            | 59    | 0.895       | 30            | 32    | 0.867       | 45            | 34    | 0.778       |
| KO00030  | Pentose phosphate pathway                           | 40            | 59    | 0.929       | 30            | 27    | 0.857       | 42            | 46    | 0.929       |
| KO00051  | Fructose and mannose metabolism                     | 42            | 50    | 0.765       | 26            | 16    | 0.600       | 38            | 35    | 0.714       |
| KO00052  | Galactose metabolism                                | 31            | 31    | 0.833       | 24            | 13    | 0.667       | 24            | 18    | 0.857       |
| KO00061  | Fatty acid biosynthesis                             | 18            | 20    | 1.000       | 24            | 10    | 0.400       | 24            | 26    | 0.800       |
| KO00071  | Fatty acid metabolism                               | 31            | 46    | 0.700       | 14            | 13    | 0.571       | 21            | 25    | 0.667       |
| KO00100  | Steroid biosynthesis                                | 18            | 24    | 0.769       | 36            | 10    | 0.467       | 22            | 21    | 0.769       |
| KO00130  | Ubiquinone and other terpenoid-quinone biosynthesis | 25            | 15    | 0.357       | 19            | 0     | 0.000       | 16            | 3     | 0.200       |
| KO00190  | Oxidative phosphorylation                           | 122           | 109   | 0.605       | 89            | 65    | 0.413       | 99            | 74    | 0.525       |
| KO00195  | Photosynthesis                                      | 71            | 21    | 0.259       | 59            | 15    | 0.217       | 66            | 18    | 0.216       |
| KO00230  | Purine metabolism                                   | 96            | 102   | 0.768       | 96            | 42    | 0.406       | 79            | 51    | 0.537       |
| KO00240  | Pyrimidine metabolism                               | 83            | 66    | 0.656       | 76            | 29    | 0.316       | 70            | 33    | 0.447       |
| KO00250  | Alanine, aspartate and glutamate metabolism         | 40            | 36    | 0.652       | 25            | 22    | 0.450       | 37            | 27    | 0.611       |
| KO00260  | Glycine, serine and threonine metabolism            | 36            | 35    | 0.714       | 28            | 17    | 0.500       | 26            | 23    | 0.765       |
| KO00270  | Cysteine and methionine metabolism                  | 60            | 72    | 0.917       | 33            | 21    | 0.500       | 38            | 40    | 0.778       |
| KO00280  | Valine, leucine and isoleucine degradation          | 32            | 39    | 0.765       | 20            | 14    | 0.500       | 27            | 29    | 0.563       |
| KO00290  | Valine, leucine and isoleucine biosynthesis         | 29            | 27    | 0.600       | 27            | 11    | 0.429       | 29            | 16    | 0.615       |
| KO00300  | Lysine biosynthesis                                 | 14            | 10    | 0.875       | 12            | 2     | 0.250       | 12            | 6     | 0.625       |
| KO00330  | Arginine and proline metabolism                     | 44            | 64    | 0.750       | 29            | 26    | 0.478       | 39            | 48    | 0.652       |
| KO00340  | Histidine metabolism                                | 19            | 26    | 0.500       | 11            | 0     | 0.000       | 15            | 14    | 0.222       |
| KO00350  | Tyrosine metabolism                                 | 25            | 31    | 0.583       | 17            | 8     | 0.222       | 25            | 18    | 0.385       |
| KO00360  | Phenylalanine metabolism                            | 47            | 57    | 0.667       | 30            | 11    | 0.182       | 28            | 22    | 0.417       |
| KO00380  | Tryptophan metabolism                               | 29            | 40    | 0.688       | 15            | 5     | 0.222       | 22            | 17    | 0.364       |
| KO00400  | Phenylalanine, tyrosine and tryptophan biosynthesis | 33            | 34    | 0.611       | 24            | 7     | 0.188       | 23            | 20    | 0.571       |
| KO00410  | beta-Alanine metabolism                             | 20            | 30    | 0.800       | 17            | 8     | 0.300       | 20            | 22    | 0.667       |

|         |                                                |    |         |       |    |    |       |     |    |       |
|---------|------------------------------------------------|----|---------|-------|----|----|-------|-----|----|-------|
| KO00450 | Selenoamino acid metabolism                    | 24 | 25      | 0.643 | 15 | 6  | 0.250 | 17  | 10 | 0.556 |
| KO00460 | Cyanoamino acid metabolism                     | 16 | 16      | 0.875 | 12 | 5  | 0.143 | 10  | 6  | 0.500 |
| KO00480 | Glutathione metabolism                         | 45 | 53      | 0.813 | 25 | 16 | 0.571 | 31  | 27 | 0.667 |
| KO00500 | Starch and sucrose metabolism                  | 83 | 76      | 0.808 | 55 | 23 | 0.429 | 54  | 36 | 0.684 |
| KO00510 | N-Glycan biosynthesis                          | 34 | 37      | 0.667 | 33 | 15 | 0.296 | 32  | 26 | 0.560 |
| KO00520 | Amino sugar and nucleotide<br>sugar metabolism | 78 | 73      | 0.833 | 47 | 20 | 0.476 | 49  | 39 | 0.722 |
| KO00561 | Glycerolipid metabolism                        | 32 | 30      | 0.471 | 29 | 5  | 0.357 | 28  | 18 | 0.375 |
| KO00562 | Inositol phosphate metabolism                  | 29 | 31      | 0.769 | 18 | 10 | 0.500 | 18  | 12 | 0.750 |
| KO00564 | Glycerophospholipid metabolism                 | 46 | 38      | 0.542 | 34 | 9  | 0.389 | 33  | 12 | 0.474 |
| KO00620 | Pyruvate metabolism                            | 56 | 79      | 0.762 | 44 | 24 | 0.529 | 49  | 46 | 0.650 |
| KO00630 | Glyoxylate and dicarboxylate<br>metabolism     | 33 | 28      | 0.818 | 18 | 15 | 0.636 | 19  | 15 | 0.700 |
| KO00640 | Propanoate metabolism                          | 17 | 31      | 0.889 | 18 | 9  | 0.364 | 22  | 25 | 0.667 |
| KO00650 | Butanoate metabolism                           | 26 | 22      | 0.667 | 18 | 12 | 0.556 | 28  | 14 | 0.545 |
| KO00670 | One carbon pool by folate                      | 14 | 15      | 0.778 | 18 | 12 | 0.571 | 12  | 8  | 0.429 |
| KO00710 | Carbon fixation in photosynthetic<br>organisms | 71 | 80      | 0.773 | 18 | 32 | 0.750 | 56  | 58 | 0.895 |
| KO00770 | Pantothenate and CoA<br>biosynthesis           | 17 | 14      | 0.583 | 18 | 7  | 0.400 | 15  | 7  | 0.444 |
| KO00860 | Porphyrin and chlorophyll<br>metabolism        | 35 | 31      | 0.714 | 18 | 8  | 0.240 | 34  | 21 | 0.500 |
| KO00900 | Terpenoid backbone biosynthesis                | 38 | 36      | 0.750 | 18 | 9  | 0.222 | 33  | 20 | 0.684 |
| KO00906 | Carotenoid biosynthesis                        | 17 | 15      | 0.615 | 18 | 3  | 0.182 | 18  | 5  | 0.250 |
| KO00910 | Nitrogen metabolism                            | 29 | 42      | 0.789 | 18 | 23 | 0.500 | 22  | 15 | 0.700 |
| KO00920 | Sulfur metabolism                              | 18 | 14      | 0.444 | 18 | 2  | 0.400 | 14  | 5  | 0.833 |
| KO00940 | Phenylpropanoid biosynthesis                   | 45 | 52      | 0.786 | 18 | 14 | 0.375 | 20  | 16 | 0.625 |
| KO00970 | Aminoacyl-tRNA biosynthesis                    | 51 | 47      | 0.778 | 18 | 12 | 0.375 | 34  | 16 | 0.409 |
| KO01040 | Biosynthesis of unsaturated fatty<br>acids     | 24 | 18      | 0.778 | 18 | 14 | 0.778 | 26  | 19 | 0.889 |
| KO03010 | Ribosome                                       | 21 | 23      | 0.707 | 18 | 22 | 0.684 | 218 | 23 | 0.712 |
|         |                                                | 2  | 6       |       |    | 4  |       | 0   |    |       |
| KO03018 | RNA degradation                                | 50 | 63      | 0.643 | 18 | 12 | 0.237 | 39  | 20 | 0.419 |
| KO03020 | RNA polymerase                                 | 35 | 22      | 0.720 | 18 | 12 | 0.400 | 27  | 14 | 0.632 |
| KO03022 | Basal transcription factors                    | 26 | 19      | 0.550 | 18 | 6  | 0.188 | 16  | 9  | 0.462 |
| KO03030 | DNA replication                                | 37 | 34      | 0.690 | 18 | 4  | 0.125 | 23  | 11 | 0.368 |
| KO03040 | Spliceosome                                    | 99 | 11<br>7 | 0.656 | 18 | 37 | 0.292 | 93  | 43 | 0.443 |
| KO03050 | Proteasome                                     | 61 | 70      | 0.829 | 18 | 58 | 0.800 | 56  | 54 | 0.758 |
| KO03060 | Protein export                                 | 42 | 37      | 0.680 | 18 | 23 | 0.524 | 34  | 22 | 0.500 |
| KO03410 | Base excision repair                           | 35 | 21      | 0.480 | 18 | 1  | 0.059 | 20  | 6  | 0.200 |
| KO03420 | Nucleotide excision repair                     | 45 | 41      | 0.600 | 18 | 7  | 0.185 | 26  | 16 | 0.421 |
| KO03430 | Mismatch repair                                | 26 | 26      | 0.650 | 18 | 3  | 0.118 | 15  | 7  | 0.364 |
| KO03440 | Homologous recombination                       | 24 | 21      | 0.611 | 18 | 2  | 0.083 | 14  | 5  | 0.222 |

|         |                                             |         |         |       |    |    |       |     |    |       |
|---------|---------------------------------------------|---------|---------|-------|----|----|-------|-----|----|-------|
| KO04070 | Phosphatidylinositol signaling system       | 26      | 52      | 0.727 | 18 | 17 | 0.556 | 11  | 18 | 0.500 |
| KO04120 | Ubiquitin mediated proteolysis              | 81      | 87      | 0.653 | 18 | 42 | 0.319 | 60  | 53 | 0.475 |
| KO04130 | SNARE interactions in vesicular transport   | 26      | 30      | 0.824 | 18 | 12 | 0.600 | 20  | 17 | 0.889 |
| KO04141 | Protein processing in endoplasmic reticulum | 10<br>6 | 11<br>2 | 0.632 | 18 | 61 | 0.446 | 110 | 78 | 0.537 |
| KO04144 | Endocytosis                                 | 54      | 78      | 0.793 | 18 | 24 | 0.385 | 35  | 37 | 0.556 |
| KO04145 | Phagosome                                   | 59      | 96      | 0.963 | 18 | 66 | 0.870 | 43  | 66 | 0.952 |
| KO04146 | Peroxisome                                  | 52      | 46      | 0.621 | 18 | 15 | 0.250 | 43  | 24 | 0.458 |
| KO04626 | Plant-pathogen interaction                  | 59      | 42      | 0.250 | 18 | 27 | 0.231 | 52  | 41 | 0.450 |
| KO04650 | Natural killer cell mediated cytotoxicity   | 16      | 26      | 0.750 | 18 | 15 | 0.750 | 16  | 22 | 1.000 |

---

**Supplementary Table 9 Predicted non-coding RNA genes.**

**Supplementary Table 9a Summary of tRNA genes identified in maize (Z. ma), rice (O. sa), sorghum (S. bi), Brachypodium (B. di), bamboo (P. he), and Arabidopsis (A. th).**

|                                          | Z.ma     | O.sa | S.bi     | B.di | P.he     | A.th |
|------------------------------------------|----------|------|----------|------|----------|------|
| tRNAs decoding Standard 20 AA            | 1,413    | 720  | 535      | 593  | 1,076    | 685  |
| Selenocysteine tRNAs (TCA)               | <b>4</b> | 0    | <b>1</b> | 0    | <b>6</b> | 0    |
| Possible suppressor tRNAs (CTA,TTA)      | <b>7</b> | 0    | <b>1</b> | 0    | <b>1</b> | 0    |
| tRNAs with undetermined/unknown isotypes | 14       | 0    | 8        | 7    | 2        | 1    |
| Predicted pseudogenes                    | 768      | 26   | 61       | 15   | 82       | 13   |
| Total tRNAs                              | 2,206    | 746  | 606      | 615  | 1,167    | 699  |

**Supplementary Table 9b Conserved non-coding RNA genes in the moso bamboo genome.**

| ncRNA Type | Loci # | Average length (bp) | Total length (bp) | % of genome |
|------------|--------|---------------------|-------------------|-------------|
| tRNA       | 1,167  | 75                  | 87,363            | 0.0043      |
| rRNA       | 279    | 714                 | 199,180           | 0.0097      |
| SnoRNA     | 321    | 118                 | 37,985            | 0.0019      |
| C/D box    | 277    | 123                 | 34,025            | 0.0017      |
| H/ACA      | 44     | 90                  | 3,960             | 0.0002      |
| snRNA      | 173    | 140                 | 24,248            | 0.0019      |
| miRNA      | 225    | 114                 | 25,748            | 0.0013      |

**Supplementary Table 9c Prediction of microRNA target genes.** The INFERNAL-predicted miRNAs were aligned to the bamboo gene models by Blastn with e-value at  $1e-10$ . The microRNAs with were clustered into the different families according to outputs of the INFERNAL prediction against Rfam database. The functional domain of each gene was searched by InterproScan against pfam database.

| MicroRNA family | Bamboo microRNA ID | Target gene     | Pfam                                    |
|-----------------|--------------------|-----------------|-----------------------------------------|
| mir156          |                    | PH01000002G1660 | PF03110 SBP                             |
|                 |                    | PH01000050G0170 | PF03110 SBP                             |
|                 |                    | PH01000095G1560 | PF03110 SBP                             |
|                 |                    | PH01000117G1390 | PF03110 SBP                             |
|                 | PH01000043m01      | PH01000145G0070 | Unknown                                 |
|                 | PH01000118m01      | PH01000150G0460 | PF03110 SBP                             |
|                 | PH01000586m01      | PH01000164G0630 | PF03110 SBP                             |
|                 | PH01000780m01      | PH01000176G0670 | PF03110 SBP                             |
|                 | PH01000906m01      | PH01000300G1120 | PF04499 SAPS                            |
|                 | PH01000906m02      | PH01000327G0270 | PF02518 HATPase_c; PF00183 HSP90        |
|                 | PH01000906m03      | PH01000450G0480 | PF03110 SBP                             |
|                 | PH01000906m03      | PH01000457G0590 | PF00076 RRM_1; PF00398 RrnaAD           |
|                 | PH01001039m01      | PH01000548G0580 | Unknown                                 |
|                 | PH01001164m01      | PH01000594G0440 | Unknown                                 |
|                 | PH01001488m01      | PH01000770G0270 | PF03110 SBP                             |
|                 | PH01001488m02      | PH01000969G0180 | PF03110 SBP                             |
|                 | PH01001488m03      | PH01001337G0400 | PF00450 Peptidase_S10                   |
|                 | PH01002501m01      | PH01002673G0070 | PF03110 SBP                             |
|                 |                    | PH01002789G0180 | PF03110 SBP                             |
|                 |                    | PH01003178G0220 | PF03110 SBP                             |
|                 | PH01003773G0220    | PF03110 SBP     |                                         |
|                 | PH01007654G0010    | PF03110 SBP     |                                         |
| MIR159          |                    | PH01000345G0790 | PF00072 Response_reg; PF06203 CCT       |
|                 | PH01000077m01      | PH01000564G0790 | PF00085 Thioredoxin                     |
|                 | PH01000130m01      | PH01000630G0430 | PF00085 Thioredoxin                     |
|                 | PH01000257m01      | PH01001806G0140 | PF06424 PRP1_N                          |
|                 | PH01001252m01      | PH01003596G0230 | Unknown                                 |
|                 |                    | PH01003618G0130 | PF00072 Response_reg; PF06203 CCT       |
|                 |                    | PH01005144G0100 | PF07690 MFS_1                           |
| mir160          | PH01000093m01      | PH01000044G0540 | PF02362 B3; PF06507 Auxin_resp          |
|                 | PH01000264m01      | PH01000069G1210 | PF06507 Auxin_resp                      |
|                 | PH01000290m01      |                 | PF04539 Sigma70_r3; PF04542 Sigma70_r2; |
|                 | PH01000323m01      | PH01000138G0430 | PF04545 Sigma70_r4                      |

|          |               |  |                  |                                               |
|----------|---------------|--|------------------|-----------------------------------------------|
|          | PH01000331m01 |  | PH01000305G0690  | PF02309 AUX_IAA; PF02362 B3; PF06507          |
|          | PH01000483m01 |  |                  | Auxin_resp                                    |
|          | PH01000702m01 |  | PH01000556G0480  | PF00856 SET; PF02182 YDG_SRA; PF05033         |
|          | PH01001046m03 |  |                  | Pre-SET                                       |
|          | PH01002185m01 |  | PH01000845G0410  | PF00168 C2; PF01412 ArfGap; PF02362 B3;       |
|          |               |  |                  | PF06507 Auxin_resp                            |
|          |               |  | PH01001026G0300  | PF02309 AUX_IAA; PF02362 B3; PF06507          |
|          |               |  |                  | Auxin_resp                                    |
|          |               |  | PH01001175G0060  | PF03552 Cellulose_synt                        |
|          |               |  | PH01001285G0430  | PF02362 B3; PF06507 Auxin_resp                |
|          |               |  | PH01002498G0280  | PF02309 AUX_IAA; PF02362 B3; PF06507          |
|          |               |  |                  | Auxin_resp                                    |
|          |               |  | PH01002685G0120  | PF02309 AUX_IAA; PF02362 B3; PF06507          |
|          |               |  |                  | Auxin_resp                                    |
|          |               |  | PH01004610G0130  | PF00892 EamA; PF03151 TPT; PF03188            |
|          |               |  |                  | Cytochrom_B561                                |
|          |               |  | PH01000015G2120  | Unknown                                       |
|          |               |  | PH01000041G2170  | PF02365 NAM                                   |
|          |               |  | PH01000057G1650  | PF00642 zf-CCCH; PF00013 KH_1                 |
|          |               |  | PH01000084G0850  | Unknown                                       |
|          |               |  | PH01000093G0340  | PF02365 NAM                                   |
|          |               |  | PH01000110G0680  | PF02365 NAM                                   |
|          |               |  | PH01000183G1320  | PF02365 NAM                                   |
|          |               |  | PH01000409G0160  | Unknown                                       |
| MIR164   | PH01000210m01 |  | PH01000483G1000  | PF02365 NAM                                   |
|          | PH01000543m01 |  | PH01000501G0450  | PF02365 NAM                                   |
|          |               |  | PH01001122G0430  | PF00070 Pyr_redox; PF02852 Pyr_redox_dim      |
|          |               |  | PH01001309G0120  | PF02365 NAM                                   |
|          |               |  | PH01001318G0370  | Unknown                                       |
|          |               |  | PH01001320G0360  | Unknown                                       |
|          |               |  | PH01002276G0270  | PF02365 NAM                                   |
|          |               |  | PH01002494G0010  | Unknown                                       |
|          |               |  | PH010004131G0150 | Unknown                                       |
|          |               |  | PH01000070G2000  | PF05071 NDUFA12                               |
|          |               |  | PH01000152G1310  | PF00327 Ribosomal_L30; PF08079                |
|          | PH01000015m01 |  |                  | Ribosomal_L30_N                               |
| MIR167_1 | PH01010914m01 |  | PH01000224G0820  | PF00327 Ribosomal_L30; PF08079                |
|          | PH01254050m01 |  |                  | Ribosomal_L30_N                               |
|          |               |  | PH01001042G0370  | PF00664 ABC_membrane; PF00005 ABC_tran        |
|          |               |  | PH01001940G0210  | PF00337 Gal-bind_lectin; PF01762 Galactosyl_T |
|          |               |  | PH01002304G0040  | PF00294 PfkB                                  |
| MIR168   | PH01000280m01 |  | PH01000003G4150  | PF04844 DUF623                                |
|          | PH01000585m01 |  | PH01000004G2090  | PF10369 ALS_ss_C                              |

|                 |                                                         |
|-----------------|---------------------------------------------------------|
| PH0100008G2140  | PF01426 BAH; PF00403 HMA; PF05641 Agenet                |
| PH0100009G2100  | PF03106 WRKY                                            |
| PH0100013G1620  | Unknown                                                 |
| PH0100016G0550  | Unknown                                                 |
| PH0100017G1630  | PF00225 Kinesin; PF11721 Malectin                       |
| PH0100019G2340  | Unknown                                                 |
| PH0100024G0010  | Unknown                                                 |
| PH0100026G0210  | PF08417 PaO; PF00355 Rieske                             |
| PH0100028G2550  | PF07690 MFS_1                                           |
| PH0100036G1230  | PF00069 Pkinase                                         |
| PH0100042G1600  | Unknown                                                 |
| PH0100045G0170  | Unknown                                                 |
| PH0100069G1200  | PF02630 SCO1-SenC                                       |
| PH01000102G0710 | Unknown                                                 |
| PH01000164G0270 | PF01554 MatE                                            |
| PH01000188G0960 | Unknown                                                 |
| PH01000197G0530 | PF00185 OTCace; PF02729 OTCace_N                        |
| PH01000223G0540 | PF05003 DUF668; PF11961 DUF3475                         |
| PH01000224G0730 | PF00125 Histone                                         |
| PH01000245G0160 | Unknown                                                 |
| PH01000349G0440 | Unknown                                                 |
| PH01000352G0040 | PF00155 Aminotran_1_2                                   |
| PH01000356G0540 | PF10447 EXOSC1                                          |
| PH01000358G0390 | PF00249 Myb_DNA-binding                                 |
| PH01000358G0650 | PF00612 IQ                                              |
| PH01000361G0710 | PF02576 DUF150                                          |
| PH01000367G0560 | PF01985 CRS1_YhbY                                       |
| PH01000367G0850 | PF04755 PAP_fibrillin                                   |
| PH01000433G0520 | PF00400 WD40                                            |
| PH01000437G0470 | Unknown                                                 |
| PH01000439G0060 | PF00278 Orn_DAP_Arg_deC; PF02784<br>Orn_Arg_deC_N       |
| PH01000448G0580 | PF00010 HLH                                             |
| PH01000538G0570 | PF02134 UBACT; PF00899 ThiF; PF10585<br>UBA_e1_thiolCys |
| PH01000542G0140 | PF01501 Glyco_transf_8; PF00403 HMA                     |
| PH01000590G0720 | Unknown                                                 |
| PH01000591G0360 | Unknown                                                 |
| PH01000597G0190 | Unknown                                                 |
| PH01000603G0510 | PF00201 UDPGT                                           |
| PH01000623G0580 | PF03081 Exo70                                           |
| PH01000666G0100 | PF00271 Helicase_C; PF09369 DUF1998                     |
| PH01000695G0190 | PF03083 MtN3_slv                                        |

|                 |                                         |
|-----------------|-----------------------------------------|
| PH01000698G0590 | PF01842 ACT                             |
| PH01000735G0110 | PF03106 WRKY                            |
| PH01000748G0450 | Unknown                                 |
| PH01000753G0540 | Unknown                                 |
| PH01000780G0490 | PF05703 DUF828; PF08458 PH_2            |
| PH01000795G0520 | PF01565 FAD_binding_4; PF08031 BBE      |
| PH01000842G0630 | PF01535 PPR                             |
| PH01000866G0400 | Unknown                                 |
| PH01000875G0370 | PF02836 Glyco_hydro_2_C; PF05282 AAR2   |
| PH01000890G0140 | PF00481 PP2C                            |
| PH01000895G0460 | PF00004 AAA                             |
| PH01001004G0250 | PF10998 DUF2838                         |
| PH01001065G0050 | PF10288 DUF2392                         |
| PH01001117G0310 | PF02701 zf-Dof                          |
| PH01001135G0080 | PF05770 Ins134_P3_kin                   |
| PH01001175G0340 | PF00097 zf-C3HC4                        |
| PH01001188G0490 | PF01486 K-box                           |
| PH01001194G0040 | Unknown                                 |
| PH01001262G0230 | PF01501 Glyco_transf_8                  |
| PH01001528G0340 | PF00226 DnaJ                            |
| PH01001597G0080 | Unknown                                 |
| PH01001599G0350 | Unknown                                 |
| PH01001740G0210 | Unknown                                 |
| PH01001760G0230 | PF03690 UPF0160                         |
| PH01001874G0080 | PF00076 RRM_1; PF00098 zf-CCHC          |
| PH01001896G0320 | PF00076 RRM_1                           |
| PH01001979G0270 | PF01106 NifU                            |
| PH01001998G0030 | Unknown                                 |
| PH01002124G0020 | Unknown                                 |
| PH01002232G0310 | PF02540 NAD_synthase                    |
| PH01002235G0180 | PF01163 RIO1                            |
| PH01002316G0200 | PF00650 CRAL_TRIO; PF03765 CRAL_TRIO_N  |
| PH01002375G0200 | PF00069 Pkinase                         |
| PH01002439G0150 | PF01535 PPR                             |
| PH01002529G0110 | PF04570 DUF581                          |
| PH01002705G0160 | PF01762 Galactosyl_T                    |
| PH01002825G0210 | Unknown                                 |
| PH01003170G0110 | PF03106 WRKY                            |
| PH01003342G0140 | Unknown                                 |
| PH01003422G0190 | PF01926 MMR_HSR1; PF06071 YchF-GTPase_C |
| PH01003917G0020 | PF01535 PPR                             |
| PH01004682G0110 | PF02686 Glu-tRNAGln                     |
| PH01004717G0040 | Unknown                                 |



|          |               |                 |                                                                                                     |
|----------|---------------|-----------------|-----------------------------------------------------------------------------------------------------|
|          |               | PH01004719G0070 | PF04597 Ribophorin_I                                                                                |
|          |               | PH01005322G0010 | PF02309 AUX_IAA; PF02362 B3; PF06507<br>Auxin_resp                                                  |
|          |               | PH01005724G0010 | Unknown                                                                                             |
|          |               | PH01007546G0020 | PF07719 TPR_2                                                                                       |
|          |               | PH01040671G0010 | Unknown                                                                                             |
|          |               | PH01262640G0010 | PF01171 ATP_bind_3                                                                                  |
| MIR169_2 | PH01000450m01 | PH01000148G1100 | PF00091 Tubulin; PF12327 FtsZ_C                                                                     |
|          | PH01000117m01 | PH01000006G0960 | Unknown                                                                                             |
| MIR169_5 | PH01000117m02 | PH01000235G0700 | Unknown                                                                                             |
|          | PH01001476m01 | PH01000463G1100 | Unknown                                                                                             |
|          | PH01002131m01 | PH01000752G0210 | Unknown                                                                                             |
|          |               | PH01000027G2350 | PF00847 AP2                                                                                         |
|          |               | PH01000095G1440 | PF00171 Aldedh                                                                                      |
|          |               | PH01000123G0110 | PF00171 Aldedh                                                                                      |
|          |               | PH01000170G1390 | PF03514 GRAS                                                                                        |
|          | PH01000169m01 | PH01000229G1370 | PF02681 DUF212                                                                                      |
|          | PH01000366m01 | PH01000498G0680 | PF00310 GATase_2; PF01380 SIS                                                                       |
|          | PH01000390m01 | PH01000666G0830 | PF08389 Xpo1                                                                                        |
| MIR171_1 | PH01001439m01 | PH01000770G0710 | Unknown                                                                                             |
|          | PH01003493m01 | PH01000850G0320 | Unknown                                                                                             |
|          | PH01003786m01 | PH01001577G0130 | PF03514 GRAS                                                                                        |
|          | PH01004538m01 | PH01001692G0030 | PF03514 GRAS                                                                                        |
|          |               | PH01001780G0280 | PF00931 NB-ARC                                                                                      |
|          |               | PH01002325G0040 | PF03514 GRAS                                                                                        |
|          |               | PH01002597G0150 | PF12214 TPX2_importin                                                                               |
|          |               | PH01099851G0010 | Unknown                                                                                             |
|          |               | PH01000369G0580 | Unknown                                                                                             |
|          |               | PH01000464G0470 | PF08030 NAD_binding_6; PF01794 Ferric_reduct;<br>PF08414 NADPH_Ox<br>PF08022 FAD_binding_8; PF08030 |
| MIR171_2 | PH01004540m01 | PH01000596G0230 | NAD_binding_6; PF01794 Ferric_reduct; PF08414<br>NADPH_Ox                                           |
|          | PH01000211m01 | PH01001043G0440 | PF00069 Pkinase                                                                                     |
|          | PH01000200m01 | PH01001716G0120 | Unknown                                                                                             |
|          |               | PH01002279G0010 | PF03070 TENA_THI-4                                                                                  |
|          |               | PH01002838G0190 | Unknown                                                                                             |
|          |               | PH01003904G0030 | PF01535 PPR                                                                                         |
|          |               | PH01000037G1490 | Unknown                                                                                             |
| mir172   | PH01000021m01 | PH01000052G2050 | Unknown                                                                                             |
|          | PH01000466m01 | PH01000097G0900 | PF00646 F-box                                                                                       |
|          | PH01004738m01 | PH01000127G0210 | Unknown                                                                                             |
|          |               | PH01000213G0510 | PF00646 F-box                                                                                       |

|        |               |                 |                                                 |
|--------|---------------|-----------------|-------------------------------------------------|
|        |               | PH01000365G0970 | Unknown                                         |
|        |               | PH01001028G0270 | Unknown                                         |
|        |               | PH01002138G0280 | PF00067 p450                                    |
|        |               | PH01002503G0090 | Unknown                                         |
|        |               | PH01002747G0060 | PF05450 Nicastrin                               |
|        |               | PH01002963G0090 | Unknown                                         |
|        |               | PH01003375G0030 | PF04859 DUF641                                  |
|        |               | PH01005644G0020 | PF00646 F-box                                   |
| <hr/>  |               |                 |                                                 |
|        |               | PH01000314G0270 | PF00078 RVT_1; PF00789 UBX; PF08284 RVP_2       |
|        |               | PH01000607G0360 | PF00026 Asp; PF05184 SapB_1; PF10551 MULE       |
|        |               | PH01000669G0280 | PF03463 eRF1_1; PF03464 eRF1_2; PF03465 eRF1_3  |
|        |               | PH01000853G0290 | PF03637 Mob1_phocein                            |
|        | PH01000021m01 | PH01001115G0420 | Unknown                                         |
| mir395 | PH01000466m01 | PH01001142G0220 | PF00560 LRR_1; PF08263 LRRNT_2; PF00069 Pkinase |
|        | PH01004738m01 | PH01001208G0380 | PF00026 Asp; PF05184 SapB_1; PF03489 SapB_2     |
|        |               | PH01001821G0330 | PF05703 DUF828                                  |
|        |               | PH01002024G0310 | Unknown                                         |
|        |               | PH01003316G0070 | PF03637 Mob1_phocein                            |
| <hr/>  |               |                 |                                                 |
|        |               | PH01000010G1850 | PF03016 Exostosin                               |
|        |               | PH01000157G1010 | PF03016 Exostosin                               |
|        |               | PH01000271G0200 | PF09258 Glyco_transf_64                         |
|        |               | PH01000436G0030 | Unknown                                         |
|        |               | PH01000502G0800 | PF09258 Glyco_transf_64                         |
|        | PH01004613m01 | PH01001655G0500 | PF00566 TBC                                     |
| mir399 | PH01000814m01 | PH01002153G0330 | Unknown                                         |
|        | PH01000429m01 | PH01002839G0140 | PF04116 FA_hydroxylase; PF12076 Wax2_C          |
|        | PH01000000m01 | PH01003152G0320 | Unknown                                         |
|        |               | PH01003440G0030 | Unknown                                         |
|        |               | PH01003658G0100 | Unknown                                         |
|        |               | PH01004857G0110 | PF00566 TBC                                     |
|        |               | PH01006818G0010 | PF12076 Wax2_C                                  |
| <hr/>  |               |                 |                                                 |
|        |               | PH01000095G1560 | PF03110 SBP                                     |
|        |               | PH01000145G0070 | Unknown                                         |
|        |               | PH01000164G0630 | PF03110 SBP                                     |
|        | PH01001265m01 | PH01000176G0670 | PF03110 SBP                                     |
| MIR535 | PH01001265m02 | PH01000474G0490 | PF03005 DUF231                                  |
|        | PH01001768m01 | PH01000548G0580 | Unknown                                         |
|        | PH01004182m01 | PH01000552G0240 | Unknown                                         |
|        |               | PH01000740G0630 | PF01255 Prenyltransf                            |
|        |               | PH01001050G0540 | PF04577 DUF563                                  |

|        |               |                 |                                      |
|--------|---------------|-----------------|--------------------------------------|
|        |               | PH01001376G0370 | PF01490 Aa_trans                     |
|        |               | PH01001876G0100 | PF00190 Cupin_1; PF08700 Vps51       |
|        |               | PH01001940G0250 | PF03171 2OG-Fell_Oxy                 |
|        |               | PH01001963G0380 | PF00400 WD40                         |
|        |               | PH01002134G0090 | PF00400 WD40                         |
|        |               | PH01002190G0080 | PF00067 p450                         |
|        |               | PH01003819G0090 | PF00139 Lectin_legB; PF00069 Pkinase |
|        |               | PH01004078G0110 | PF00069 Pkinase                      |
|        |               | PH01007654G0010 | PF03110 SBP                          |
|        |               | <hr/>           |                                      |
|        | PH01000753m01 | PH01000272G1270 | PF00505 HMG_box                      |
| MIR821 | PH01000535m01 | PH01001058G0400 | PF00657 Lipase_GDSL                  |
|        | PH01000378m01 | PH01001316G0020 | PF03110 SBP                          |
|        | PH01003487m01 |                 |                                      |
|        |               | <hr/>           |                                      |

**Supplementary Table 10 Statistics of Repetitive sequences.**

**Supplementary Table 10a Repetitive sequences in the moso bamboo genome.**

|                                            | <b>Length<br/>occupied (bp)</b> | <b>Percentage of<br/>sequences</b> |
|--------------------------------------------|---------------------------------|------------------------------------|
| <b>Class I elements (Retroelements)</b>    | <b>790,027,115</b>              | <b>0.385</b>                       |
| <b>LTR Retrotransposons</b>                | <b>764,632,374</b>              | <b>0.373</b>                       |
| LTR/ <i>Copia</i>                          | 251,526,442                     | 0.123                              |
| LTR/ <i>Gypsy</i>                          | 505,181,075                     | 0.246                              |
| unclassified LTR                           | 7,924,857                       | 0.004                              |
| <b>non-LTR Retrotransposons</b>            | <b>24,526,904</b>               | <b>0.012</b>                       |
| LINE                                       | 23,701,208                      | 0.012                              |
| SINE                                       | 825,696                         | 0.000                              |
| <b>unclassified retrotransposons</b>       | <b>867,837</b>                  | <b>0.000</b>                       |
| <b>Class II elements (DNA Transposons)</b> | <b>194,238,269</b>              | <b>0.095</b>                       |
| <b>DNA Transposons</b>                     | <b>176,524,830</b>              | <b>0.086</b>                       |
| DNA/En-Spm                                 | 74,871,248                      | 0.036                              |
| DNA/hAT                                    | 26,546,823                      | 0.013                              |
| DNA/MuDR                                   | 73,460,366                      | 0.036                              |
| DNA/Harbinger                              | 1,646,393                       | 0.001                              |
| <b>MITEs</b>                               | <b>7,356,902</b>                | 0.004                              |
| DNA/TcMar-Stowaway                         | 3,209,627                       | 0.002                              |
| DNA/Tourist                                | 4,147,275                       | 0.002                              |
| <b>RC/Helitrons</b>                        | <b>3,241,423</b>                | <b>0.002</b>                       |
| <b>unclassified transposons</b>            | <b>7,115,114</b>                | <b>0.003</b>                       |
| <b>Unknown repeats</b>                     | <b>226,597,546</b>              | <b>0.110</b>                       |
| <b>Total transposable elements</b>         | <b>1,210,862,930</b>            | <b>0.590</b>                       |
| <b>Low_complexity</b>                      | <b>1,130,281</b>                | <b>0.001</b>                       |

**Supplementary Table 10b Comparison of TEs with highest copies among moso bamboo, rice, and sorghum.**

| Bamboo        |                     |        | Rice          |                     |        | Sorghum           |                     |        |
|---------------|---------------------|--------|---------------|---------------------|--------|-------------------|---------------------|--------|
| Repeat ID     | Class of TE-element | Copies | Repeat ID     | Class of TE-element | Copies | Repeat ID         | Class of TE-element | Copies |
| PH01R6F001124 | LTR/Gypsy           | 20,624 | WANDERER_OS   | DNA/Tourist         | 8,531  | TSB1              | Harbinger           | 20,984 |
| PH01R1F000001 | DNA/En-Spm          | 16,987 | STOWAWAY41_OS | DNA/TcMar-Stowaway  | 5,821  | Tourist1a_SB      | Harbinger           | 7,731  |
| PH01R3F000573 | DNA/En-Spm          | 16,918 | Gaijin        | DNA/Tourist         | 4,986  | Copia-141_SB-LTR  | Copia               | 7,430  |
| PH01R1F000000 | DNA/En-Spm          | 15,691 | STOWAWAY47_OS | DNA/TcMar-Stowaway  | 4,518  | ATHILA-1_SBi-LTR  | Gypsy               | 6,810  |
| PH01R6F000783 | Unknown             | 13,094 | STOWAWAY1_OS  | DNA/TcMar-Stowaway  | 4,445  | Gypsy-133_SBi-LTR | Gypsy               | 5,863  |
| PH01R5F002220 | LTR/Gypsy           | 12,658 | SEVERIN-2     | RC/Helitron         | 4,260  | Gypsy-122_SBi-LTR | Gypsy               | 5,802  |
| PH01R1F000002 | LTR/Gypsy           | 11,637 | TREP215       | DNA/TcMar-Stowaway  | 4,142  | TSB2              | Harbinger           | 5,720  |
| PH01R5F002786 | LTR/Copia           | 10,725 | Explorer      | DNA                 | 3,854  | Gypsy-125_SBi-LTR | Gypsy               | 5,482  |
| PH01R5F002970 | LTR/Gypsy           | 9,602  | STOWAWAY2_OS  | DNA/TcMar-Stowaway  | 3,671  | Gypsy-127_SBi-LTR | Gypsy               | 5,337  |
| PH01R6F002209 | LTR/Gypsy           | 9,446  | SINE03_OS     | SINE                | 3,507  | Gypsy-125_SBi-I   | Gypsy               | 5,002  |

**Supplementary Table 10c Comparison of TEs occupying most genome size among the moso bamboo, rice, and sorghum.**

| Bamboo        |                     |        |                           | Rice          |                     |        |                           | Sorghum           |                     |        |                           |
|---------------|---------------------|--------|---------------------------|---------------|---------------------|--------|---------------------------|-------------------|---------------------|--------|---------------------------|
| Repeat ID     | Class of TE-element | Copies | Occupied genome size (bp) | Repeat ID     | Class of TE-element | Copies | Occupied genome size (bp) | Repeat ID         | Class of TE-element | Copies | Occupied genome size (bp) |
| PH01R6F001124 | LTR/Gypsy           | 20624  | 21071416                  | SPMLIKE       | DNA/En-Spm          | 2150   | 6292696                   | Gypsy-122_SBi-I   | Gypsy               | 4366   | 27222661                  |
| PH01R5F003093 | LTR/Gypsy           | 6366   | 16535123                  | RETRO2_I      | LTR/Gypsy           | 628    | 3846962                   | Gypsy-133_SBi-I   | Gypsy               | 4979   | 17779891                  |
| PH01R6F002209 | LTR/Gypsy           | 9446   | 15516557                  | RIRE2_I       | LTR/Gypsy           | 758    | 3498738                   | Gypsy-121_SBi-I   | Gypsy               | 3137   | 14031073                  |
| PH01R1F000002 | LTR/Gypsy           | 11637  | 12906984                  | RIRE3_LTR     | LTR/Gypsy           | 1956   | 3338048                   | ATHILA-1_SBi-I    | Gypsy               | 4976   | 11493996                  |
| PH01R6F000836 | LTR/Copia           | 7388   | 12860851                  | ATLANTYS-I_OS | LTR/Gypsy           | 1086   | 3215554                   | Gypsy-136_SBi-I   | Gypsy               | 3917   | 10004929                  |
| PH01R5F002786 | LTR/Copia           | 10725  | 12543585                  | TRUNCATOR     | LTR/Gypsy           | 1755   | 2952995                   | ATHILA-1_SBi-LTR  | Gypsy               | 6810   | 8641228                   |
| PH01R6F004818 | LTR/Gypsy           | 4337   | 12059267                  | RIRE3A_LTR    | LTR/Gypsy           | 2301   | 2796270                   | Gypsy-125_SBi-I   | Gypsy               | 5002   | 8122387                   |
| PH01R6F002298 | LTR/Gypsy           | 6746   | 11580121                  | SZ-7_int      | LTR/Gypsy           | 693    | 2394637                   | Gypsy-128_SBi-LTR | Gypsy               | 2820   | 7778326                   |
| PH01R5F002220 | LTR/Gypsy           | 12658  | 10774197                  | TRUNCATOR2_OS | LTR/Gypsy           | 2411   | 2356738                   | Gypsy-122B_SBi-I  | Gypsy               | 2366   | 7355980                   |
| PH01R1F000015 | LTR/Copia           | 6969   | 9936341                   | RIREX_I       | LTR/Gypsy           | 967    | 2179712                   | ATHILA-3_SBi-I    | Gypsy               | 3267   | 7080252                   |

**Supplementary Table 11 Mean Ks and divergence time for the bamboo versus grass species.** Mean Ks and divergence time between the bamboo and fully sequenced grass species were calculated from the Ks distribution of obtained 968 single-copy gene families. Calculation of Ks were performed by MA model that averages parameters across 14 candidate models<sup>30</sup>. Divergence time were calculated using a substitution rate of  $6.5 \times 10^{-9}$  mutations per site per year. The Ks of internal duplication was estimated by calculating the Ks of the paralogous pair from the 2-member gene clusters, of which the derived divergence time was indicative of the WGD time.

| <b>Species</b>                     | <b>Mean Ks</b> | <b>Divergence time (mya)</b> |
|------------------------------------|----------------|------------------------------|
| Brachypodium vs. Bamboo            | 0.610          | 46.9                         |
| Wheat <sup>1</sup> vs. Bamboo      | 0.621          | 47.8                         |
| Rice vs. Bamboo                    | 0.632          | 48.6                         |
| Foxtail millet vs. Bamboo          | 0.701          | 53.9                         |
| Sorghum vs. Bamboo                 | 0.761          | 58.5                         |
| Maize vs. Bamboo                   | 0.840          | 64.6                         |
| <b>Bamboo internal duplication</b> | 0.10 - 0.15    | 7.7 - 11.5                   |
| <b>Maize internal duplication</b>  | 0.15 - 0.20    | 11.5 - 15.4                  |

<sup>1</sup> The wheat gene models were downloaded at [ftp://ftp.ncbi.nih.gov/repository/UniGene/Triticum\\_aestivum/](ftp://ftp.ncbi.nih.gov/repository/UniGene/Triticum_aestivum/).

**Supplementary Table 12 Change of gene family size in bamboo, with comparison to different plant genomes.** Fields highlighted in green represented the families with expanding gene number. Fields highlighted in red represented the families with contracting gene number. The gene families were generated by the OrthoMCL analysis. The estimation of gene family size change was performed by a CAFE calculation with  $P$ -value < 0.01.

| Family No. | Description of conserved function domains                                                          | Phe | Bdi | Osa | Sbi | Zma | Sit | Ath | P-value |
|------------|----------------------------------------------------------------------------------------------------|-----|-----|-----|-----|-----|-----|-----|---------|
| # 4        | PF03552 Cellulose_synt,PF01652 IF4E                                                                | 31  | 15  | 23  | 25  | 31  | 27  | 16  | 0.005   |
| # 18       | PF00931 NB-ARC,PF00560 LRR_1,PF01657 DUF26,PF01419 Jacalin                                         | 27  | 2   | 39  | 25  | 2   | 30  | 0   | 0.000   |
| # 24       | PF02364 Glucan_synthase,PF04652 DUF605                                                             | 18  | 11  | 12  | 12  | 8   | 23  | 12  | 0.001   |
| # 702      | PF00931 NB-ARC                                                                                     | 14  | 0   | 6   | 1   | 0   | 0   | 0   | 0.000   |
| # 66       | PF00931 NB-ARC,PF00400 WD40,PF02671 PAH,PF03446 NAD_binding_2                                      | 13  | 0   | 15  | 14  | 8   | 19  | 0   | 0.000   |
| # 43       | PF00069 Pkinase                                                                                    | 12  | 9   | 9   | 7   | 11  | 20  | 8   | 0.004   |
| # 451      | PF00403 HMA                                                                                        | 12  | 4   | 3   | 2   | 2   | 1   | 1   | 0.009   |
| # 82       | PF07645 EGF_CA PF02797 Chal_sti_synt_C PF08392 FAE1_CUT1_RppA PF00069 Pkinase                      | 11  | 7   | 12  | 12  | 5   | 15  | 0   | 0.000   |
| # 116      | PF00931 NB-ARC                                                                                     | 11  | 0   | 9   | 13  | 2   | 15  | 0   | 0.000   |
| # 89       | PF00862 Sucrose_synt,PF00534 Glycos_transf_1                                                       | 9   | 6   | 7   | 3   | 7   | 13  | 6   | 0.005   |
| # 457      | PF00931 NB-ARC                                                                                     | 9   | 1   | 8   | 3   | 0   | 5   | 0   | 0.000   |
| # 98       | PF03822 NAF,PF00069 Pkinase                                                                        | 8   | 5   | 6   | 5   | 6   | 17  | 4   | 0.001   |
| # 125      | PF00400 WD40                                                                                       | 8   | 3   | 3   | 2   | 4   | 12  | 5   | 0.001   |
| # 175      | PF00072 Response_reg,PF02518 HATPase_c,PF00512 HisKA,PF03924 CHASE                                 | 8   | 3   | 4   | 2   | 7   | 8   | 3   | 0.005   |
| # 285      | PF04578 DUF594                                                                                     | 8   | 5   | 6   | 5   | 1   | 7   | 0   | 0.003   |
| # 348      | PF00931 NB-ARC                                                                                     | 8   | 2   | 8   | 2   | 1   | 8   | 0   | 0.000   |
| # 109      | PF03030 H_PPase                                                                                    | 7   | 4   | 6   | 6   | 8   | 16  | 1   | 0.002   |
| # 140      | PF04810 zf-Sec23_Sec24,PF04811 Sec23_trunk,PF04815 Sec23_helical,PF00626 Gelsolin,PF08033 Sec23_BS | 7   | 4   | 4   | 4   | 4   | 13  | 5   | 0.008   |
| # 331      | PF00560 LRR_1,PF00931 NB-ARC                                                                       | 7   | 5   | 2   | 9   | 2   | 5   | 0   | 0.001   |
| # 265      | PF02309 AUX_IAA,PF02362 B3,PF06507 Auxin_resp                                                      | 6   | 3   | 3   | 2   | 5   | 9   | 1   | 0.009   |
| # 307      | PF00560 LRR_1 PF00931 NB-ARC                                                                       | 6   | 4   | 8   | 3   | 1   | 9   | 0   | 0.001   |
| # 454      | PF00931 NB-ARC                                                                                     | 6   | 2   | 6   | 8   | 0   | 4   | 0   | 0.000   |
| # 10664    | PF00560 LRR_1                                                                                      | 6   | 0   | 0   | 1   | 0   | 0   | 0   | 0.001   |
| # 215      | PF01909 NTP_transf_2,PF04926 PAP_RNA-bind,PF04928 PAP_central                                      | 5   | 3   | 3   | 3   | 3   | 14  | 3   | 0.001   |
| # 243      | PF00026 Asp,PF05184 SapB_1,PF03489 SapB_2                                                          | 5   | 2   | 3   | 1   | 3   | 14  | 3   | 0.000   |
| # 323      | PF00067 p450,PF02298 Cu_bind_like                                                                  | 5   | 1   | 3   | 9   | 5   | 7   | 0   | 0.004   |
| # 385      | PF00560 LRR_1 PF00931 NB-ARC PF00069 Pkinase                                                       | 5   | 2   | 5   | 3   | 1   | 12  | 0   | 0.000   |
| # 622      | PF01909 NTP_transf_2                                                                               | 4   | 1   | 1   | 1   | 2   | 8   | 1   | 0.002   |



|        |                                                                                   |    |    |    |    |    |    |    |       |
|--------|-----------------------------------------------------------------------------------|----|----|----|----|----|----|----|-------|
| # 700  | PF01428 zf-AN1,PF01754 zf-A20                                                     | 4  | 1  | 2  | 0  | 3  | 6  | 1  | 0.003 |
| # 246  | PF00067 p450                                                                      | 3  | 1  | 2  | 1  | 1  | 10 | 6  | 0.002 |
| # 618  | PF02896 PEP-utilizers_C PF01326 PPK_N PF00391 PEP-utilizers                       | 3  | 1  | 2  | 1  | 2  | 11 | 1  | 0.001 |
| # 1    | PF00560 LRR_1,PF08263 LRRNT_2,PF00069 Pkinase                                     | 30 | 24 | 68 | 44 | 19 | 51 | 5  | 0.000 |
| # 5    | PF00139 Lectin_legB,PF00106 adh_short,PF00069 Pkinase                             | 22 | 28 | 37 | 30 | 23 | 30 | 13 | 0.006 |
| # 2    | PF00954 S_locus_glycop,PF07714 Pkinase_Tyr,PF01453 B_lectin,PF08276 PAN_2,PF11883 | 19 | 18 | 27 | 28 | 18 | 39 | 26 | 0.000 |
| # 14   | PF00560 LRR_1,PF08263 LRRNT_2,PF00069 Pkinase,PF01280 Ribosomal_L19e              | 15 | 17 | 30 | 21 | 13 | 32 | 5  | 0.000 |
| # 28   | PF00954 S_locus_glycop,PF01453 B_lectin,PF08276 PAN_2,PF00069 Pkinase             | 15 | 16 | 34 | 15 | 13 | 5  | 1  | 0.000 |
| # 11   | PF07714 Pkinase_Tyr,PF00202 Aminotran_3,PF11721 Malectin ,PF00560 LRR_1           | 11 | 6  | 25 | 6  | 8  | 25 | 13 | 0.000 |
| # 35   | PF00954 S_locus_glycop,PF01453 B_lectin,PF08276 PAN_2,PF00069 Pkinase             | 9  | 11 | 29 | 14 | 5  | 12 | 0  | 0.000 |
| # 70   | PF00560 LRR_1,PF01464 SLT,PF08263 LRRNT_2                                         | 9  | 9  | 12 | 10 | 4  | 19 | 1  | 0.000 |
| # 74   | PF00125 Histone                                                                   | 8  | 13 | 10 | 11 | 2  | 1  | 8  | 0.000 |
| # 21   | PF00271 Helicase_C,PF01535 PPR,PF02365 NAM,PF02466 Tim17                          | 7  | 7  | 10 | 18 | 7  | 12 | 23 | 0.001 |
| # 126  | PF00560 LRR_1,PF00931 NB-ARC                                                      | 7  | 16 | 14 | 2  | 0  | 10 | 0  | 0.000 |
| # 96   | PF00560 LRR_1,PF00931 NB-ARC                                                      | 6  | 14 | 4  | 13 | 3  | 17 | 0  | 0.000 |
| # 122  | PF00117 GATase,PF06418 CTP_synth_N                                                | 5  | 5  | 6  | 3  | 5  | 15 | 5  | 0.003 |
| # 108  | PF00931 NB-ARC,PF05725 FNIP,PF00560 LRR_1                                         | 4  | 7  | 12 | 15 | 1  | 14 | 0  | 0.000 |
| # 159  | PF00128 Alpha-amylase,PF07821 Alpha-amyl_C2                                       | 4  | 3  | 6  | 6  | 4  | 16 | 1  | 0.000 |
| # 197  | PF00931 NB-ARC                                                                    | 4  | 3  | 12 | 7  | 3  | 9  | 0  | 0.000 |
| # 26   | PF00560 LRR_1,PF00069 Pkinase                                                     | 3  | 12 | 12 | 7  | 3  | 14 | 42 | 0.000 |
| # 71   | PF00069 Pkinase                                                                   | 3  | 4  | 17 | 2  | 8  | 4  | 0  | 0.000 |
| # 131  | PF02519 Auxin_inducible                                                           | 3  | 1  | 8  | 5  | 3  | 9  | 9  | 0.005 |
| # 138  | PF00009 GTP_EFTU,PF03143 GTP_EFTU_D3,PF03144 GTP_EFTU_D2                          | 3  | 4  | 4  | 1  | 7  | 16 | 4  | 0.000 |
| # 287  | PF00931 NB-ARC                                                                    | 3  | 9  | 7  | 4  | 2  | 7  | 0  | 0.004 |
| # 294  | PF07714 Pkinase_Tyr,PF07645 EGF_CA                                                | 3  | 8  | 7  | 7  | 2  | 5  | 0  | 0.002 |
| # 169  | PF00931 NB-ARC                                                                    | 2  | 3  | 7  | 6  | 8  | 15 | 0  | 0.000 |
| # 170  | PF07714 Pkinase_Tyr                                                               | 2  | 4  | 12 | 3  | 3  | 3  | 0  | 0.010 |
| # 191  | PF00232 Glyco_hydro_1                                                             | 2  | 2  | 3  | 8  | 4  | 12 | 3  | 0.003 |
| # 205  | PF03171 2OG-Fell_Oxy,PF11744 ALMT                                                 | 2  | 3  | 2  | 3  | 2  | 13 | 5  | 0.001 |
| # 206  | PF04398 DUF538                                                                    | 2  | 2  | 9  | 5  | 7  | 13 | 0  | 0.000 |
| # 262  | PF00854 PTR2                                                                      | 2  | 3  | 5  | 7  | 3  | 9  | 1  | 0.010 |
| # 313  | PF00931 NB-ARC                                                                    | 2  | 3  | 5  | 6  | 1  | 12 | 0  | 0.000 |
| # 332  | PF00931 NB-ARC                                                                    | 2  | 2  | 7  | 5  | 9  | 5  | 0  | 0.005 |
| # 461  | PF02892 zf-BED                                                                    | 2  | 2  | 3  | 6  | 0  | 5  | 1  | 0.002 |
| # 1316 | PF00931 NB-ARC                                                                    | 2  | 2  | 7  | 3  | 0  | 3  | 0  | 0.004 |
| # 55   | PF00560 LRR_1,PF08263 LRRNT_2                                                     | 1  | 5  | 25 | 6  | 4  | 8  | 18 | 0.000 |
| # 68   | PF01107 MP,PF00098 zf-CCHC,PF02160 Peptidase_A3,PF00078 RVT_1,PF00077 RVP         | 1  | 0  | 12 | 21 | 0  | 3  | 0  | 0.000 |

|        |                                                              |   |    |    |    |    |    |   |       |
|--------|--------------------------------------------------------------|---|----|----|----|----|----|---|-------|
| # 106  | PF00067 p450                                                 | 1 | 10 | 10 | 5  | 3  | 10 | 0 | 0.000 |
| # 111  | PF00394 Cu-oxidase,PF07731 Cu-oxidase_2,PF07732 Cu-oxidase_3 | 1 | 10 | 4  | 3  | 4  | 30 | 0 | 0.000 |
| # 221  | PF00232 Glyco_hydro_1                                        | 1 | 3  | 5  | 9  | 8  | 2  | 6 | 0.007 |
| # 223  | PF00891 Methyltransf_2,PF08100 Dimerisation                  | 1 | 0  | 7  | 2  | 7  | 3  | 0 | 0.000 |
| # 252  | PF03330 DPBB_1                                               | 1 | 8  | 2  | 5  | 3  | 9  | 0 | 0.000 |
| # 475  | PF00931 NB-ARC                                               | 1 | 1  | 5  | 8  | 2  | 9  | 0 | 0.000 |
| # 556  | PF00067 p450                                                 | 1 | 1  | 11 | 4  | 2  | 5  | 0 | 0.000 |
| # 678  | PF03478 DUF295,PF04493 Endonuclease_5                        | 1 | 1  | 2  | 3  | 10 | 3  | 1 | 0.001 |
| # 754  | PF04578 DUF594                                               | 1 | 2  | 2  | 1  | 0  | 15 | 0 | 0.000 |
| # 755  | PF03087 DUF241                                               | 1 | 3  | 6  | 4  | 0  | 3  | 0 | 0.001 |
| # 845  | PF02362 B3                                                   | 1 | 1  | 2  | 12 | 0  | 4  | 0 | 0.000 |
| # 849  | PF04578 DUF594                                               | 1 | 2  | 3  | 4  | 1  | 9  | 0 | 0.001 |
| # 1138 | PF00646 F-box                                                | 1 | 2  | 10 | 2  | 0  | 2  | 0 | 0.001 |
| # 1139 | PF07714 Pkinase_Tyr,PF07645 EGF_CA,PF08488 WAK               | 1 | 3  | 7  | 1  | 1  | 5  | 0 | 0.004 |
| # 1140 | PF00646 F-box                                                | 1 | 2  | 13 | 1  | 0  | 1  | 0 | 0.000 |
| # 1536 | PF00067 p450                                                 | 1 | 3  | 2  | 9  | 1  | 0  | 0 | 0.000 |
| # 2111 | PF03088 Str_synth                                            | 1 | 1  | 3  | 5  | 0  | 4  | 0 | 0.001 |
| # 88   | PF01593 Amino_oxidase,PF02721 DUF223                         | 0 | 2  | 1  | 2  | 54 | 0  | 0 | 0.000 |
| # 171  | PF05699 hATC                                                 | 0 | 0  | 8  | 23 | 0  | 1  | 7 | 0.000 |
| # 222  | PF01357 Pollen_allerg_1                                      | 0 | 0  | 15 | 6  | 9  | 7  | 0 | 0.000 |
| # 276  | PF03004 Transposase_24                                       | 0 | 2  | 5  | 2  | 19 | 5  | 0 | 0.000 |
| # 295  | PF00069 Pkinase                                              | 0 | 8  | 1  | 6  | 8  | 9  | 0 | 0.000 |
| # 333  | PF00067 p450                                                 | 0 | 2  | 1  | 5  | 1  | 10 | 7 | 0.000 |
| # 335  | PF00321 Thionin                                              | 0 | 4  | 12 | 1  | 0  | 9  | 4 | 0.000 |
| # 472  | PF00177 Ribosomal_S7                                         | 0 | 5  | 11 | 2  | 3  | 1  | 2 | 0.000 |
| # 473  | PF00646 F-box,PF03169 OPT                                    | 0 | 8  | 5  | 4  | 7  | 2  | 0 | 0.000 |

**Supplementary Table 13 Gene synteny.****Supplementary Table 13a Statistics of syntenic bamboo loci on the aligned rice genome**

| Rice          | No. of syntenic gene blocks | No. of syntenic genes | Average gene number per block |
|---------------|-----------------------------|-----------------------|-------------------------------|
| Chromosome-01 | 217                         | 2,563                 | 11.8                          |
| Chromosome-02 | 153                         | 1,756                 | 11.5                          |
| Chromosome-03 | 216                         | 2,467                 | 11.4                          |
| Chromosome-04 | 135                         | 1,747                 | 12.9                          |
| Chromosome-05 | 166                         | 1,506                 | 9.1                           |
| Chromosome-06 | 147                         | 1,389                 | 9.4                           |
| Chromosome-07 | 126                         | 1,165                 | 9.2                           |
| Chromosome-08 | 91                          | 812                   | 8.9                           |
| Chromosome-09 | 110                         | 962                   | 8.7                           |
| Chromosome-10 | 96                          | 850                   | 8.9                           |
| Chromosome-11 | 60                          | 932                   | 15.5                          |
| Chromosome-12 | 90                          | 1,586                 | 17.6                          |
| sum           | 1,607                       | 17,735                | 11.0                          |

**Supplementary Table 13b Statistics of syntenic bamboo loci on the aligned sorghum genome**

| Sorghum       | No. of syntenic gene blocks | No. of syntenic genes | Average gene number per block |
|---------------|-----------------------------|-----------------------|-------------------------------|
| Chromosome-01 | 296                         | 3,319                 | 11.2                          |
| Chromosome-02 | 212                         | 1,893                 | 8.9                           |
| Chromosome-03 | 199                         | 2,364                 | 11.9                          |
| Chromosome-04 | 159                         | 1,667                 | 10.5                          |
| Chromosome-05 | 48                          | 352                   | 7.3                           |
| Chromosome-06 | 134                         | 1,688                 | 12.6                          |
| Chromosome-07 | 102                         | 909                   | 8.9                           |
| Chromosome-08 | 72                          | 708                   | 9.8                           |
| Chromosome-09 | 167                         | 1,507                 | 9.0                           |
| Chromosome-10 | 150                         | 1,339                 | 8.9                           |
| Sum           | 1,539                       | 15,746                | 10.2                          |

Note: A total of 30,379 (94.8% of 31,987) Bamboo loci located on the scaffolds with length over 50 KB were aligned to the rice and sorghum gene models, respectively. At least 5 genes are required to call synteny. Within a syntenic gene block, the maximum number of non-syntenic genes between two adjacent syntenic genes should be less than 5.

**Supplementary Table 14 Quantity of cell wall biosynthesis genes in plant genomes.**

**Supplementary Table 14a Comparison of copy numbers of cellulose synthase (*CesA*) and cellulose synthase-like (*Csl*) genes among grasses, Arabidopsis, and poplar.** The subfamilies *CsA*, *C*, *D*, *E*, *F*, *G*, *H*, and *J* were classified by the referenced genes located on the same clade.

|             | P.he | A.th | Z.ma | B.di | S.bi | O.sa | P.tr |
|-------------|------|------|------|------|------|------|------|
| <i>CesA</i> | 19   | 10   | 20   | 9    | 12   | 11   | 18   |
| Total       | 38   | 29   | 33   | 24   | 37   | 34   | 37   |
| <i>CsA</i>  | 9    | 8    | 10   | 8    | 8    | 10   | 5    |
| <i>CsB</i>  | 0    | 6    | 0    | 0    | 0    | 0    | 2    |
| <i>CsC</i>  | 10   | 5    | 8    | 4    | 6    | 6    | 5    |
| <i>CsD</i>  | 7    | 6    | 5    | 3    | 5    | 5    | 11   |
| <i>CsE</i>  | 4    | 1    | 2    | 3    | 3    | 3    | 3    |
| <i>CsF</i>  | 7    | 0    | 7    | 5    | 11   | 8    | 0    |
| <i>CsG</i>  | 0    | 3    | 0    | 0    | 0    | 0    | 4    |
| <i>CsH</i>  | 0    | 0    | 0    | 1    | 3    | 2    | 0    |
| <i>CsJ</i>  | 1    | 0    | 1    | 0    | 1    | 0    | 2    |

**Supplementary Table 14b Copy number of genes involved in phenylpropanoid and lignin biosynthetic pathways.**

|      | PAL | C4H | C3H | 4CL | HCT | CCR | CCoAOMT | CAD | F5H | COMT |
|------|-----|-----|-----|-----|-----|-----|---------|-----|-----|------|
| P.he | 8   | 4   | 3   | 6   | 4   | 3 * | 2       | 1   | 3   | 1    |
| A.th | 4   | 1   | 3   | 4   | 1   | 2   | 1       | 2   | 2   | 1    |
| Z.ma | 10  | 4   | 2   | 3   | 2   | 1   | 2       | 1   | 2   | 1    |
| B.di | 8   | 3   | 1   | 5   | 2   | 2   | 1       | 1   | 2   | 1    |
| S.bi | 9   | 3   | 2   | 5   | 2   | 2   | 1       | 1   | 2   | 1    |
| O.sa | 9   | 4   | 2   | 5   | 2   | 2   | 1       | 1   | 3   | 1    |
| P.tr | 5   | 2   | 3   | 5   | 2   | 7   | 2       | 1   | 4   | 2    |

\* Two interrupted bamboo CCR genes were not included.

Abbreviation of the encoded proteins: Phenylalanine ammonia lyase (PAL), Cinnamate-4-hydroxylase (C4H), p-Coumaroyl shikimate 3'-hydroxylase/Coumaroyl 3-hydroxylase (C3H), 4-Coumarate:CoA Ligase (4CL), Hydroxycinnamoyl-CoA:shikimate/quinic acid hydroxycinnamoyltransferase (HCT), Cinnamoyl-CoA reductase (CCR), Trans-caffeoyl-CoA 3-O-methyltransferase (CCoAOMT), Cinnamyl alcohol dehydrogenase (CAD), Ferulate 5-hydroxylase (F5H), Caffeic acid 3-O-methyltransferase (COMT).

**Supplementary Table 15 Expression of cell wall genes in bamboo.**

**Supplementary Table 15a Gene expression of the *CesA* subfamilies.** The expression level was shown as the quantified transcript level (RPKM) in the 7 sequenced tissues.

| Annotated bamboo<br>loci of <i>CesA</i><br>subfamiy | Quantified transcript level (RPKM) |         |         |      |      |          |          |
|-----------------------------------------------------|------------------------------------|---------|---------|------|------|----------|----------|
|                                                     | shoot20                            | shoot50 | rhizome | root | leaf | panicle1 | panicle2 |
| PH01000018G0380                                     | 2                                  | 2       | 16      | 52   | 96   | 46       | 32       |
| PH01000040G0670                                     | 15                                 | 13      | 4       | 5    | 2    | 2        | 1        |
| PH01000204G0350                                     | 39                                 | 27      | 58      | 115  | 35   | 38       | 15       |
| PH01000357G0340                                     | 23                                 | 22      | 9       | 5    | 8    | 6        | 5        |
| PH01000441G0190                                     | 38                                 | 33      | 10      | 6    | 4    | 3        | 3        |
| PH01000482G0850                                     | 27                                 | 25      | 0       | 3    | 1    | 1        | 0        |
| PH01000536G0710                                     | 1                                  | 1       | 2       | 2    | 1    | 2        | 3        |
| PH01000693G0390                                     | 3                                  | 1       | 24      | 104  | 125  | 80       | 55       |
| PH01000746G0570                                     | 3                                  | 1       | 10      | 43   | 45   | 36       | 19       |
| PH01000905G0290                                     | 32                                 | 19      | 17      | 57   | 9    | 10       | 4        |
| PH01000924G0590                                     | 2                                  | 0       | 12      | 69   | 64   | 51       | 31       |
| PH01001105G0500                                     | 23                                 | 16      | 10      | 22   | 11   | 6        | 2        |
| PH01001146G0100                                     | 0                                  | 0       | 0       | 0    | 0    | 1        | 1        |
| PH01001175G0060                                     | 38                                 | 28      | 16      | 37   | 8    | 13       | 9        |
| PH01001427G0390                                     | 47                                 | 30      | 6       | 8    | 6    | 3        | 2        |
| PH01002002G0290                                     | 46                                 | 48      | 46      | 20   | 27   | 26       | 14       |
| PH01002004G0190                                     | 1                                  | 1       | 5       | 20   | 28   | 14       | 12       |
| PH01002232G0080                                     | 8                                  | 7       | 1       | 3    | 1    | 2        | 0        |
| PH01003000G0020                                     | 22                                 | 18      | 16      | 16   | 11   | 9        | 5        |

**Supplementary Table 15b Gene expression of the *CsI* subfamilies.** The expression level was shown as the quantified transcript level (RPKM) in the 7 sequenced tissues.

| <i>CsI</i><br>subfamily | Annotated bamboo<br>loci | Quantified transcript level (RPKM) |         |         |      |      |          |          |
|-------------------------|--------------------------|------------------------------------|---------|---------|------|------|----------|----------|
|                         |                          | shoot20                            | shoot50 | rhizome | root | leaf | panicle1 | panicle2 |
| <i>CsIA</i>             | PH01000068G1400          | 18                                 | 20      | 10      | 5    | 5    | 3        | 2        |
|                         | PH01000135G1390          | 15                                 | 10      | 15      | 37   | 6    | 5        | 9        |
|                         | PH01000366G0010          | 3                                  | 2       | 24      | 15   | 4    | 4        | 4        |
|                         | PH01000484G0010          | 9                                  | 10      | 15      | 6    | 19   | 24       | 16       |
|                         | PH01000926G0020          | 7                                  | 6       | 2       | 2    | 0    | 0        | 0        |
|                         | PH01001938G0190          | 0                                  | 0       | 0       | 0    | 0    | 0        | 0        |
|                         | PH01002436G0250          | 124                                | 117     | 26      | 17   | 17   | 12       | 5        |
|                         | PH01003149G0030          | 17                                 | 27      | 8       | 2    | 2    | 4        | 3        |
| <i>CsIC</i>             | PH01006529G0050          | 6                                  | 6       | 12      | 20   | 13   | 11       | 7        |
|                         | PH01000099G1140          | 5                                  | 3       | 3       | 4    | 1    | 1        | 0        |
|                         | PH01000155G1560          | 8                                  | 3       | 0       | 1    | 0    | 0        | 0        |
|                         | PH01000379G0160          | 16                                 | 13      | 6       | 5    | 10   | 4        | 4        |
|                         | PH01000423G0430          | 7                                  | 3       | 4       | 9    | 2    | 2        | 2        |
|                         | PH01000523G0700          | 4                                  | 3       | 4       | 7    | 3    | 2        | 1        |
|                         | PH01000883G0140          | 7                                  | 6       | 6       | 1    | 1    | 1        | 1        |
|                         | PH01001206G0170          | 14                                 | 13      | 10      | 4    | 21   | 8        | 5        |
|                         | PH01001338G0260          | 22                                 | 18      | 10      | 1    | 18   | 4        | 1        |
|                         | PH01001674G0100          | 13                                 | 13      | 6       | 0    | 2    | 0        | 0        |
| PH01003525G0010         | 2                        | 3                                  | 2       | 0       | 1    | 1    | 2        |          |
| <i>CsID</i>             | PH01000083G1270          | 24                                 | 25      | 22      | 14   | 10   | 6        | 5        |
|                         | PH01000246G0240          | 6                                  | 9       | 5       | 5    | 5    | 4        | 3        |
|                         | PH01001020G0160          | 22                                 | 24      | 4       | 1    | 1    | 1        | 0        |
|                         | PH01001105G0500          | 23                                 | 16      | 10      | 22   | 11   | 6        | 2        |
|                         | PH01001695G0020          | 11                                 | 11      | 3       | 1    | 1    | 1        | 0        |
|                         | PH01002587G0110          | 0                                  | 0       | 0       | 0    | 0    | 0        | 1        |
|                         | PH01002699G0130          | 0                                  | 0       | 0       | 0    | 0    | 0        | 0        |
| <i>CsIE</i>             | PH01000699G0390          | 0                                  | 0       | 1       | 9    | 4    | 4        | 4        |
|                         | PH01000941G0440          | 2                                  | 2       | 3       | 2    | 13   | 11       | 11       |
|                         | PH01000941G0520          | 0                                  | 0       | 0       | 1    | 87   | 8        | 4        |
|                         | PH01001562G0420          | 2                                  | 2       | 3       | 7    | 2    | 4        | 3        |
| <i>CsIF</i>             | PH01001344G0180          | 11                                 | 12      | 16      | 26   | 25   | 13       | 6        |
|                         | PH01001742G0110          | 26                                 | 16      | 41      | 43   | 31   | 23       | 11       |
|                         | PH01001945G0240          | 0                                  | 0       | 0       | 0    | 9    | 0        | 0        |
|                         | PH01001945G0320          | 4                                  | 1       | 49      | 66   | 0    | 0        | 0        |
|                         | PH01001945G0340          | 1                                  | 0       | 0       | 0    | 0    | 0        | 0        |
|                         | PH01002576G0070          | 0                                  | 0       | 0       | 0    | 3    | 1        | 1        |
|                         | PH01002576G0110          | 1                                  | 1       | 3       | 5    | 23   | 7        | 3        |
| <i>CsIJ</i>             | PH01002763G0260          | 0                                  | 0       | 0       | 1    | 4    | 9        | 16       |

Note: The plant cell walls represented the most predominant determinant of overall form, grow, and development. The younger moso bamboo shoot has fastest growth speed in the world, which can grow around 4 feet within 24 hours. Our phylogenic analysis and RNA-seq data revealed gene expansion in *Cs/Cs*, *Cs/As*, and *CesAs* and many duplications involved genes with higher expression in shoot. The *Cs/C* has been identified to encode a xyloglucan glucan synthase to produce  $\beta$ -1-4-glucans backbone of xyloglucans in primary wall formation<sup>31</sup>. The CSLA proteins synthesized  $\beta$ -(1-4)-linked mannan in the cell wall<sup>32</sup>. The recent study found that some member of both *Cs/A* and *Cs/C* subfamily were involved in hemicellulose predominantly in Golgi membranes<sup>33</sup>. Correspondingly, the *Cs/A* and *Cs/C* subfamilies were observed to have the highest copies among the *Cs/s*. So potentially, evolution of *Cs/C* and *CesA* families were important to formation of bamboo-specific characters in shoot development.

**Supplementary Table 16 Gene expression of selected loci with significantly increased transcription level (>2- fold increase, Q-value < 0.001) in the floral tissues.** The involved pathways referenced the function information of the Arabidopsis/rice homologs (TAIR10 and MSU RGAP 6.1) and conserved domains identified by Interpro. The 7 sequenced tissues were shown as S20 (tip of 20-cm shoot), S50 (tip of 50-cm shoot), RH (rhizome), RT (root), LF (leaf), P1 (panicle at the early stage), and P2 (panicle at the flowering stage). Only the loci with higher expression in two or more copies were listed in the table. Table listed the genes carrying clustered conserved function domains (Interpro domains).

| Abbr.           | Floral genes in bamboo | Known homologous genes        | Referencing function | Interpro domains                                                                                                 |
|-----------------|------------------------|-------------------------------|----------------------|------------------------------------------------------------------------------------------------------------------|
| ERF             | PH01000032G1740        | <i>OsERF3</i> <sup>34</sup>   | Drought tolerance    | IPR001471 Pathogenesis-related transcriptional factor/ERF, DNA-binding;<br>IPR016177 DNA-binding, integrase-type |
|                 | PH01000046G1730        |                               |                      |                                                                                                                  |
|                 | PH01000129G0360        |                               |                      |                                                                                                                  |
|                 | PH01000573G0640        | <i>OsAP2-39</i> <sup>34</sup> | Drought tolerance    |                                                                                                                  |
|                 | PH01000573G0670        |                               |                      |                                                                                                                  |
|                 | PH01001102G0050        |                               |                      |                                                                                                                  |
|                 | PH01001360G0530        |                               |                      |                                                                                                                  |
|                 | PH01001634G0140        |                               |                      |                                                                                                                  |
|                 | PH01001704G0270        |                               |                      |                                                                                                                  |
|                 | PH01002279G0250        |                               |                      |                                                                                                                  |
|                 | PH01002393G0230        |                               |                      |                                                                                                                  |
|                 | PH01002571G0300        |                               |                      |                                                                                                                  |
|                 | PH01002648G0300        |                               |                      |                                                                                                                  |
|                 | PH01003475G0200        |                               |                      |                                                                                                                  |
| PH01004791G0030 |                        |                               |                      |                                                                                                                  |



|                  |                 |                               |                                |                                                                                                                                                   |
|------------------|-----------------|-------------------------------|--------------------------------|---------------------------------------------------------------------------------------------------------------------------------------------------|
|                  | PH01000028G1600 |                               |                                |                                                                                                                                                   |
| bZIP             | PH01000173G1010 | <i>OsbZIP23</i> <sup>35</sup> | Salinity and drought tolerance | IPR004827 Basic-leucine zipper (bZIP) transcription factor; IPR011616 bZIP transcription factor, bZIP-1                                           |
|                  | PH01000437G0190 | <i>OsbZIP23</i> <sup>35</sup> | Salinity and drought tolerance |                                                                                                                                                   |
|                  | PH01000682G0190 |                               |                                |                                                                                                                                                   |
|                  | PH01000811G0380 |                               |                                |                                                                                                                                                   |
|                  | PH01001986G0070 |                               |                                |                                                                                                                                                   |
|                  | PH01000242G0910 | <i>OsbZIP45</i> <sup>36</sup> |                                |                                                                                                                                                   |
| CCT/B-box        | PH01000831G0230 |                               |                                | IPR010402 CCT domain                                                                                                                              |
|                  | PH01169704G0010 |                               |                                |                                                                                                                                                   |
| F-box            | PH01003868G0020 |                               |                                | IPR001810 F-box domain, cyclin-like   IPR022364 F-box domain, Skp2-like                                                                           |
|                  | PH01000198G0670 |                               |                                |                                                                                                                                                   |
|                  | PH01000317G0460 |                               |                                |                                                                                                                                                   |
|                  | PH01000610G0210 |                               |                                |                                                                                                                                                   |
| HTH,<br>Myb-type | PH01000383G0320 |                               |                                | IPR001005 SANT, DNA-binding; IPR006447 Myb-like DNA-binding domain, SHAQKYF class; IPR017930 HTH transcriptional regulator, Myb-type, DNA-binding |
|                  | PH01002069G0200 |                               |                                |                                                                                                                                                   |
|                  | PH01002344G0400 |                               |                                |                                                                                                                                                   |
|                  | PH01002440G0410 |                               |                                |                                                                                                                                                   |
|                  | PH01004165G0090 |                               |                                |                                                                                                                                                   |
| homeobox         | PH01000001G0190 |                               |                                | IPR001356 Homeobox   IPR003106 Leucine zipper, homeobox-associated IPR017970 Homeobox, conserved site                                             |
|                  | PH01000042G1220 |                               |                                |                                                                                                                                                   |
|                  | PH01000496G0570 |                               |                                |                                                                                                                                                   |
|                  | PH01000922G0150 |                               |                                |                                                                                                                                                   |
|                  | PH01000630G0150 |                               |                                |                                                                                                                                                   |
| MADS-box         | PH01001303G0110 |                               |                                | IPR002100 Transcription factor,                                                                                                                   |

|        |                 |                                 |                                |                                                                                                                   |
|--------|-----------------|---------------------------------|--------------------------------|-------------------------------------------------------------------------------------------------------------------|
|        | PH01001952G0230 |                                 |                                | MADS-box                                                                                                          |
|        | PH01000306G0610 | <i>OsMADS14</i>                 | FMI                            |                                                                                                                   |
|        | PH01000317G0080 | <i>OsMADS2</i>                  | FMI                            |                                                                                                                   |
|        | PH01000606G0250 | <i>OsMADS14</i>                 | FMI                            |                                                                                                                   |
|        | PH01002127G0260 | <i>OSMADS3</i>                  | FMI                            |                                                                                                                   |
|        | PH01000222G1190 | <i>OsMADS14</i>                 | FMI                            |                                                                                                                   |
|        | PH01001188G0490 |                                 |                                |                                                                                                                   |
|        | PH01001952G0190 | <i>OsMADS1</i>                  | FMI                            |                                                                                                                   |
| NAC    | PH01000053G1650 | <i>OsNAC10</i> <sup>37</sup>    | Salinity and drought tolerance | IPR003441 No apical meristem (NAM) protein                                                                        |
|        | PH01000122G1000 | <i>SNAC1</i> <sup>38</sup>      |                                |                                                                                                                   |
|        | PH01001843G0210 | <i>SNAC1</i> <sup>38</sup>      |                                |                                                                                                                   |
|        | PH01004006G0090 | <i>OsNAC10</i> <sup>37</sup>    |                                |                                                                                                                   |
| WD-40  | PH01000091G0440 | <i>SRWD3</i> <sup>39</sup>      | Salinity tolerance             | IPR001680 WD40 repeat   IPR015943 WD40/YVTN repeat-like-containing domain   IPR019775 WD40 repeat, conserved site |
|        | PH01000600G0380 |                                 |                                |                                                                                                                   |
|        | PH01003526G0090 | <i>SRWD5</i> <sup>39</sup>      | Salinity tolerance             |                                                                                                                   |
| YABBY  | PH01000162G1010 | <i>OsYABBY2</i> <sup>40</sup>   | FMI                            | IPR006780 YABBY protein                                                                                           |
| zf-Dof | PH01000113G0300 | <i>OsDof12</i> <sup>23,24</sup> | Regulation of FMI              | IPR003851 Zinc finger, Dof-type                                                                                   |
|        | PH01000290G0170 |                                 |                                |                                                                                                                   |
|        | PH01000323G0330 |                                 |                                |                                                                                                                   |
|        | PH01002061G0210 |                                 |                                |                                                                                                                   |
| HSP20  | PH01000015G0220 |                                 |                                | IPR002068 Heat shock protein Hsp20                                                                                |
|        | PH01000154G1240 | <i>OsHSP17.7</i> <sup>41</sup>  | Dought and heat tolerance      |                                                                                                                   |
|        | PH01000268G0820 |                                 |                                |                                                                                                                   |

|          |                 |                                    |                                                                |                                                                                                                                       |
|----------|-----------------|------------------------------------|----------------------------------------------------------------|---------------------------------------------------------------------------------------------------------------------------------------|
|          | PH01000543G0160 | <i>OsCIPK15</i> <sup>42</sup>      | Defense response                                               |                                                                                                                                       |
|          | PH01000906G0020 | <i>Oshsp18.0-CII</i> <sup>43</sup> | response to heat stress, mechanical injury, and salicylic acid |                                                                                                                                       |
|          | PH01000943G0260 |                                    |                                                                |                                                                                                                                       |
|          | PH01000967G0270 | <i>Oshsp26</i> <sup>44</sup>       | Heat and oxidative tolerance                                   |                                                                                                                                       |
|          | PH01001115G0640 | <i>OsHSP17.7</i> <sup>41</sup>     | Drought and heat tolerance                                     |                                                                                                                                       |
|          | PH01001131G0040 | <i>Oshsp18.0-CII</i> <sup>43</sup> | response to heat stress, mechanical injury, and salicylic acid |                                                                                                                                       |
|          | PH01003771G0070 | <i>OsHSP17.0</i> <sup>41</sup>     | Drought and heat tolerance                                     |                                                                                                                                       |
|          | PH01004446G0090 |                                    |                                                                |                                                                                                                                       |
|          | PH01172955G0010 | <i>Oshsp18.0-CII</i> <sup>43</sup> | response to heat stress, mechanical injury, and salicylic acid |                                                                                                                                       |
|          | PH01000101G0740 |                                    |                                                                |                                                                                                                                       |
| HSP70    | PH01000639G0270 | <i>OsHSP71.1</i> <sup>45</sup>     | Abiotic stress tolerance                                       | IPR001023 Heat shock protein Hsp70   IPR018181 Heat shock protein 70, conserved site                                                  |
|          | PH01000974G0590 | <i>OsHSP71.1</i> <sup>45</sup>     |                                                                |                                                                                                                                       |
|          | PH01001109G0400 | <i>OsHSP71.1</i> <sup>45</sup>     |                                                                |                                                                                                                                       |
|          | PH01001215G0490 |                                    |                                                                |                                                                                                                                       |
|          | PH01001722G0380 |                                    |                                                                |                                                                                                                                       |
|          | PH01000430G0800 |                                    |                                                                |                                                                                                                                       |
|          | PH01001102G0260 |                                    |                                                                |                                                                                                                                       |
| HSP DnaJ | PH01003393G0080 |                                    |                                                                | IPR001623 Heat shock protein DnaJ, N-terminal   IPR003095 Heat shock protein DnaJ   IPR018253 Heat shock protein DnaJ, conserved site |
|          | PH01004637G0120 |                                    |                                                                |                                                                                                                                       |
|          | PH01035373G0010 |                                    |                                                                |                                                                                                                                       |
|          | PH01000298G0920 |                                    |                                                                |                                                                                                                                       |
|          | PH01000667G0420 |                                    |                                                                |                                                                                                                                       |

|               |                 |                               |  |                              |                                                                                                                             |
|---------------|-----------------|-------------------------------|--|------------------------------|-----------------------------------------------------------------------------------------------------------------------------|
| HSF           | PH01000000G3800 |                               |  | Heat and oxidative tolerance | IPR000232 Heat shock factor (HSF)-type, DNA-binding   IPR011991 Winged helix-turn-helix transcription repressor DNA-binding |
|               | PH01000081G0140 | <i>OsHSF7</i> <sup>46</sup>   |  |                              |                                                                                                                             |
|               | PH01000174G0590 | <i>OsHSF7</i> <sup>46</sup>   |  |                              |                                                                                                                             |
|               | PH01000194G0800 | <i>OsHsfA2c</i> <sup>47</sup> |  |                              |                                                                                                                             |
|               | PH01000208G0690 | <i>OsHSF7</i> <sup>46</sup>   |  |                              |                                                                                                                             |
|               | PH01000314G0470 | <i>OsHsfB2b</i> <sup>47</sup> |  |                              |                                                                                                                             |
|               | PH01000546G0840 | <i>OsHsfA2c</i> <sup>47</sup> |  |                              |                                                                                                                             |
|               | PH01003169G0070 |                               |  |                              |                                                                                                                             |
|               | PH01002606G0040 |                               |  |                              |                                                                                                                             |
| peroxidase    | PH01000207G0510 |                               |  | Oxidative tolerance          | IPR000823 Plant peroxidase   IPR019793 Peroxidases heme-ligand binding site   IPR019794 Peroxidase, active site             |
|               | PH01004839G0040 | AT1G30870,                    |  |                              |                                                                                                                             |
|               | PH01017692G0010 | AT1G44970 <sup>48</sup>       |  |                              |                                                                                                                             |
| Dehydrin      | PH01000279G0080 |                               |  | Drought tolerance            | IPR000167 Dehydrin                                                                                                          |
|               | PH01001299G0140 | AT3G50980 <sup>49</sup>       |  |                              |                                                                                                                             |
| Thaumatococin | PH01001035G0130 |                               |  |                              | IPR001938 Thaumatococin, pathogenesis-related   IPR017949 Thaumatococin, conserved site                                     |
|               | PH01001519G0090 |                               |  |                              |                                                                                                                             |
| HM            | PH01000010G3140 |                               |  | Drought tolerance            | IPR006121 Heavy metal transport/detoxification protein                                                                      |
|               | PH01000689G0270 | AT4G16380 <sup>50</sup>       |  |                              |                                                                                                                             |
|               | PH01002103G0360 |                               |  |                              |                                                                                                                             |
| MT            | PH01001117G0170 |                               |  | Defense response             | IPR000347 Plant metallothionein, family 15                                                                                  |
|               | PH01004749G0070 |                               |  |                              |                                                                                                                             |
|               | PH01001892G0210 | AT5G02380 <sup>51</sup>       |  |                              |                                                                                                                             |
|               | PH01001967G0220 |                               |  |                              |                                                                                                                             |

|      |                                                                          |                         |                   |                                   |
|------|--------------------------------------------------------------------------|-------------------------|-------------------|-----------------------------------|
|      | PH01003107G0020                                                          |                         |                   |                                   |
| BURP | PH01000333G0270<br>PH01000435G0330<br>PH01001626G0090<br>PH01001648G0010 | AT5G25610 <sup>52</sup> | Drought tolerance | IPR004873 BURP                    |
| MIP  | PH01000021G0560<br>PH01001074G0010<br>PH01001117G0550                    | AT1G01620 <sup>53</sup> | Drought tolerance | IPR000425 Major intrinsic protein |

Note: description of the abbreviation was listed at the follows: ERF, ethylene-responsive transcriptional factor ; bZIP, Basic-leucine zipper (bZIP) transcription factor; CCT/B-box, CCT/B-box zinc finger protein; F-box, F-box domain containing protein; HTH myb-type, Helix-turn-helix transcriptional regulator, Myb-type; Homeobox, Homeobox domain containing protein; MADS-box, Transcription factor, MADS-box; NAC, NAC domain transcription factor; WD-40, WD-40 repeat family protein; YABBY, YABBY domain containing protein; zf-Dof, dof zinc finger domain containing protein. HSP20, Heat shock protein Hsp20; HSP70, Heat shock protein Hsp70; HSP DnaJ, Heat shock protein DnaJ; HSF, Heat shock factor (HSF)-type; Peroxidase, Plant peroxidase; Dehydrin, Dehydrin domain containing proteins; Thaumatin, Thaumatin domain containing proteins; HM, Heavy metal transport/detoxification protein); MT, Plant metallothionein, family 15; BURP, BURP domain containing proteins; MIP, Major intrinsic protein.

**Supplementary Table 17 Insertion of TEs in homologs of *CO* and FPI genes.**

| Function                                                           | Known floral genes in rice and <i>Arabidopsis</i> <sup>†</sup>                                                                                                   | Homologous loci in moso bamboo |                          | Insertion of the repeats |                                   | Expression at flowering |
|--------------------------------------------------------------------|------------------------------------------------------------------------------------------------------------------------------------------------------------------|--------------------------------|--------------------------|--------------------------|-----------------------------------|-------------------------|
|                                                                    |                                                                                                                                                                  | Scaffold                       | Position                 | TE type                  | Position <sup>‡</sup>             |                         |
| Transcription factor<br><i>CONSTANS</i><br>(up-regulation of FPIs) | <i>CO</i> (At5g15840) <sup>54</sup> & <i>Hd-1</i> (LOC_Os06g16370) <sup>55</sup>                                                                                 | PH01000682                     | 157487 - 159283          | LINE/L1                  | 3'-UTR, 390 bp from stop-codon    | very low¶               |
|                                                                    |                                                                                                                                                                  | PH01005551                     | 14180 - 15803            |                          |                                   | not detected            |
|                                                                    |                                                                                                                                                                  | PH01002508                     | 56985 - 62300            | LTR/Gypsy                | intron, insertion >4,000 bp       | not detected            |
| FPIs (floral pathway integrators)                                  | <i>FT</i> (At1g65480), <i>TSF</i> (At4g20370), <i>TFL1</i> (At5g03840) <sup>56</sup> , <i>RCN2</i> (LOC_Os02g32950) <sup>57</sup> & <i>Hd3a</i> (LOC_Os06g06320) | PH01000216                     | 339337 - 340520          | LINE/L1                  | promoter, 578 bp from start-codon | very low                |
|                                                                    |                                                                                                                                                                  | PH01002091                     | 17501 - 18413            | LINE/L1                  | 3'-UTR, 456 bp from stop-codon    | not detected            |
|                                                                    |                                                                                                                                                                  | PH01001461                     | 145851 - 156173          | LTR/Copia                | coding region                     | not detected            |
|                                                                    |                                                                                                                                                                  | PH01000257                     | 828385 - 839445          | LTR/Gypsy & DNA/En-Spm   | intron, insertion >8,000 bp       | not detected            |
|                                                                    |                                                                                                                                                                  | PH01002149                     | 213193 - 215000          | DNA/TcMar-Stowaway       | 5'-UTR, 187 bp from start-codon   | not detected            |
|                                                                    |                                                                                                                                                                  | PH01000020                     | 1187666 - 1189438        | Unclassified TE          | promter, 661 bp form start-codon  | very low                |
|                                                                    |                                                                                                                                                                  | PH01000089                     | 982699 - 984616          | Unclassified TE          | coding region                     | not detected            |
| PH01000128                                                         | 233584 - 235378                                                                                                                                                  | LTR/Gypsy                      | near 3'-UTR, 920 bp from | not detected             |                                   |                         |

|            |                   |                                |                                                                   |              |
|------------|-------------------|--------------------------------|-------------------------------------------------------------------|--------------|
| PH01000255 | 718847 - 720785   | Unclassified TE                | stop-codon<br>promoter, <400<br>bp from<br>start-codon<br>intron, | very low     |
| PH01000191 | 326436 - 332802   | DNA/hAT-Tag1 & unclassified TE | insertion >5,000<br>bp<br>intron,                                 | not detected |
| PH01000063 | 1107445 - 1113586 | DNA/hAT-Tag1 & DNA/En-Spm      | insertion >5,000<br>bp                                            | not detected |
| PH01000253 | 791493 - 793545   | Unclassified TE                | promoter, 240 bp<br>from start-codon                              | very low     |
| PH01002961 | 177515 - 178039   | LTR/Copia                      | coding region                                                     | not detected |
| PH01001126 | 132864 - 133880   | Unclassified TE                | promoter, 457 bp<br>from start-codon                              | not detected |
| PH01002288 | 8168 - 9361       | DNA/TcMar-Stowaway             | coding region                                                     | not detected |
| PH01001134 | 281529 - 282416   | DNA/MuDR                       | 3'-UTR, 395 bp<br>from stop-codon                                 | not detected |
| PH01003363 | 146371 - 147247   |                                |                                                                   | very low     |
| PH01002916 | 66198 - 67076     | Unclassified TE                | 5'-UTR, 140 bp<br>from start-codon                                | not detected |
| PH01004268 | 53808 - 55349     | DNA/MuDR                       | promoter, 400 bp<br>from start-codon                              | not detected |
| PH01003270 | 154451 - 153545   |                                |                                                                   | not detected |
| PH01001769 | 121285 - 125158   | LTR/Gypsy & DNA/En-Spm         | coding region                                                     | not detected |
| PH01001953 | 255266 - 256989   | LINE/L1                        | promoter, 500 bp                                                  | very low     |

|                                                                                |                   |                 |                 |                                      |                          |
|--------------------------------------------------------------------------------|-------------------|-----------------|-----------------|--------------------------------------|--------------------------|
|                                                                                |                   |                 |                 | from start-codon                     |                          |
|                                                                                | PH01000265        | 193381 - 195152 | LINE/L1         | promoter, 500 bp<br>from start-codon | not detected             |
| <i>ATC</i> (At2g27550) <sup>56</sup> &<br><i>BFT</i> (At5g62040) <sup>58</sup> | PH01000019        | 26402 - 27560   | LINE/L1         | coding region                        | not detected             |
|                                                                                | PH01000354        | 535405 - 536549 | DNA/MuDR        | 3'-UTR, 500 bp<br>from stop-codon    | very low                 |
|                                                                                | PH01002570        | 19730 - 20888   | Unclassified TE | promoter, 600 bp<br>from start-codon | not detected             |
| <i>MFT</i> (At1g18090) <sup>59</sup>                                           | No homologs found |                 |                 |                                      |                          |
| <i>TFL2</i> (At5g17690) <sup>60</sup>                                          | No homologs found |                 |                 |                                      |                          |
| <i>Ehd1</i><br>(LOC_Os10g32600) <sup>22</sup>                                  | No homologs found |                 |                 |                                      |                          |
|                                                                                | PH01000596        | 810562 - 811503 | DNA/hAT-Ac      | coding region,<br>lost 2 exon        | higher in leaf           |
| <i>OsSOC1</i><br>(LOC_Os03g03070) <sup>21</sup>                                | PH01000107        | 455178 - 459374 | DNA/hAT-Ac      | 5'-UTR, 20 bp<br>from start-codon    | higher in shoot          |
|                                                                                | PH01000759        | 371677 - 372787 | LTR/Copia       | coding region,<br>lost 2 exon        | very low                 |
|                                                                                | PH01002152        | 94108 - 96884   | LTR/Gypsy       | 1st intron                           | higher in shoot and leaf |
| <i>RFL</i><br>(LOC_Os04g51000) <sup>61</sup>                                   | PH01001425        | 66798 - 69307   |                 |                                      | very low                 |
|                                                                                | PH01000386        | 696552 - 703389 | DNA/hAT-Ac      | coding region                        | not detected             |

<sup>†</sup> Abbreviations of gene description: *CONSTANS* (*CO*), *Heading date 1* (*Hd-1*), *FLOWERING LOCUS T* (*FT*), *TWIN SISTER OF FT* (*TSF*), *BROTHER OF FT AND TFL2* (*TFL1*), *Reduced Culm Number 2* (*RCN2*), *Heading date-3a* (*Hd3a*), *Arabidopsis thaliana CENTRORADIALIS* (*ATC*), *BROTHER OF FT AND TFL1* (*BFT*), *MOTHER OF FT AND TFL1* (*MFT*), *BROTHER OF FT AND TFL2* (*TFL2*), *Early heading date 1* (*End1*), *rice LFY homolog* (*RFL*), and *SUPPRESSOR OF OVEREXPRESSION OF CO 1* (*OsSOC1*).



‡ For the position of repeat insertion, the 3'-UTR (3'-untranslated region), 5'-UTR, and promoter regions were estimated according to the analysis of the bamboo full-length cDNAs when the end of the gene model was not supported by the full-length cDNA. The estimated 3-UTR length was set at less than 500 bp from stop-codon, 5'-UTR less 250 bp from start-codon, and promoter region at over 250bp upstream of start-codon.

¶ Very low meant RPKM less than 5.

**Supplementary Table 18 Quantified transcription levels of bamboo genes with homologs of Arabidopsis floral genes.**

| Identified genes in Arabidopsis                                                   | Abbreviation†         | Function             | Homologs in bamboo | RPKM |     |    |    |    |    |    |
|-----------------------------------------------------------------------------------|-----------------------|----------------------|--------------------|------|-----|----|----|----|----|----|
|                                                                                   |                       |                      |                    | S20  | S50 | RH | RT | LF | P1 | P2 |
| AT4G24540,<br>AT2G22540 <sup>62</sup>                                             | <i>AGL24, SVP</i>     | Regulator of FPI/FMI | PH01000038G1550    | 9    | 9   | 4  | 21 | 2  | 3  | 2  |
|                                                                                   |                       |                      | PH01000437G0930    | 72   | 71  | 52 | 36 | 26 | 11 | 10 |
| AT2G27550 <sup>63</sup> ,<br>AT5G62040 <sup>58</sup> ,<br>AT5G03840 <sup>64</sup> | <i>ATC, BFT, TFL1</i> | FPI                  | PH01001134G0390    | 0    | 0   | 0  | 0  | 0  | 0  | 0  |
|                                                                                   |                       |                      | PH01002570G0010    | 4    | 2   | 0  | 0  | 0  | 0  | 0  |
|                                                                                   |                       |                      | PH01003363G0220    | 0    | 1   | 0  | 0  | 0  | 0  | 0  |
| AT5G06100 <sup>65</sup>                                                           | <i>ATMYB33</i>        | Regulator of FPI/FMI | PH01000029G1950    | 2    | 1   | 1  | 0  | 1  | 0  | 1  |
|                                                                                   |                       |                      | PH01000009G0060    | 2    | 2   | 1  | 1  | 2  | 1  | 7  |
| AT4G08920 <sup>66</sup> ,<br>AT1G04400 <sup>67</sup>                              | <i>CRY1, CRY2</i>     | Photoperiod pathway  | PH01000263G1210    | 6    | 4   | 1  | 2  | 5  | 3  | 1  |
|                                                                                   |                       |                      | PH01000968G0540    | 8    | 6   | 3  | 2  | 4  | 4  | 4  |
|                                                                                   |                       |                      | PH01002304G0120    | 4    | 3   | 4  | 4  | 3  | 1  | 1  |
|                                                                                   |                       |                      | PH01002373G0140    | 3    | 2   | 1  | 1  | 3  | 2  | 1  |
| AT4G22140 <sup>68</sup>                                                           | <i>EBS</i>            | Regulator of FPI/FMI | PH01001266G0500    | 20   | 32  | 19 | 7  | 7  | 8  | 6  |
|                                                                                   |                       |                      | PH01001406G0500    | 12   | 14  | 3  | 1  | 1  | 6  | 5  |
|                                                                                   |                       |                      | PH01002328G0250    | 9    | 12  | 0  | 0  | 0  | 0  | 0  |
| AT4G15880 <sup>69</sup>                                                           | <i>ESD4</i>           | Autonomous pathway   | PH01000364G0790    | 2    | 3   | 2  | 1  | 2  | 1  | 1  |
|                                                                                   |                       |                      | PH01000526G0230    | 8    | 12  | 9  | 7  | 7  | 5  | 7  |
|                                                                                   |                       |                      | PH01001219G0240    | 6    | 7   | 10 | 5  | 7  | 4  | 6  |
| AT1G68050 <sup>70</sup>                                                           | <i>FKF1</i>           | Photoperiod pathway  | PH01002213G0250    | 9    | 9   | 2  | 2  | 3  | 3  | 5  |
|                                                                                   |                       |                      | PH01002958G0010    | 11   | 9   | 6  | 16 | 7  | 10 | 22 |
|                                                                                   |                       |                      | PH01007024G0030    | 15   | 15  | 6  | 6  | 9  | 6  | 7  |

|                                                      |                              |                     |                 |     |     |     |     |    |    |    |
|------------------------------------------------------|------------------------------|---------------------|-----------------|-----|-----|-----|-----|----|----|----|
|                                                      |                              |                     | PH01000114G1110 | 11  | 12  | 6   | 4   | 6  | 5  | 5  |
|                                                      |                              |                     | PH01000836G0340 | 9   | 7   | 3   | 9   | 6  | 12 | 16 |
| AT3G04610 <sup>71</sup>                              | FLK                          | Autonomous pathway  | PH01000025G1210 | 11  | 10  | 9   | 9   | 3  | 7  | 8  |
|                                                      |                              |                     | PH01000171G0620 | 158 | 175 | 157 | 133 | 76 | 76 | 75 |
|                                                      |                              |                     | PH01000280G1350 | 3   | 1   | 5   | 2   | 4  | 3  | 6  |
|                                                      |                              |                     | PH01001197G0230 | 3   | 4   | 4   | 3   | 1  | 1  | 1  |
| AT5G24860 <sup>72</sup>                              | FPF1                         | Gibberellin pathway | PH01000002G4150 | 2   | 1   | 6   | 2   | 9  | 15 | 18 |
|                                                      |                              |                     | PH01001317G0310 | 0   | 0   | 0   | 2   | 5  | 1  | 2  |
|                                                      |                              |                     | PH01002809G0210 | 13  | 10  | 10  | 16  | 0  | 18 | 47 |
| AT4G00650 <sup>73</sup>                              | FRI                          | Autonomous pathway  | PH01000371G0250 | 2   | 1   | 3   | 1   | 2  | 2  | 4  |
| AT1G65480 <sup>74</sup> ,<br>AT4G20370 <sup>75</sup> | FT,TSF                       | FPI                 | PH01002288G0050 | 0   | 0   | 0   | 0   | 1  | 0  | 0  |
|                                                      |                              |                     | PH01000020G1780 | 0   | 0   | 0   | 0   | 1  | 1  | 1  |
| AT2G19520 <sup>76</sup>                              | FVE                          | Autonomous pathway  | PH01000048G0850 | 42  | 35  | 37  | 17  | 21 | 14 | 10 |
|                                                      |                              |                     | PH01000241G0710 | 56  | 52  | 93  | 38  | 57 | 39 | 28 |
| AT4G02780 <sup>77</sup>                              | GA1                          | Gibberellin pathway | PH01000557G0660 | 4   | 3   | 2   | 2   | 3  | 6  | 4  |
| AT1G14920,<br>AT2G01570,<br>AT1G66350,<br>AT3G03450  | GAI,RGA,RGL <sup>78-80</sup> | Gibberellin pathway | PH01004823G0070 | 3   | 1   | 2   | 1   | 1  | 1  | 2  |
|                                                      |                              |                     | PH01143550G0010 | 0   | 0   | 0   | 0   | 0  | 0  | 0  |
|                                                      |                              |                     | PH01190367G0010 | 25  | 33  | 9   | 10  | 3  | 4  | 9  |
|                                                      |                              |                     | PH01000142G0910 | 27  | 40  | 92  | 60  | 19 | 33 | 65 |
|                                                      |                              |                     | PH01000254G0530 | 0   | 0   | 0   | 0   | 0  | 0  | 0  |
| AT3G05120,<br>AT5G27320                              | Gar <sup>81</sup>            | Gibberellin pathway | PH01001316G0350 | 4   | 3   | 3   | 2   | 6  | 8  | 10 |
|                                                      |                              |                     | PH01002734G0310 | 3   | 3   | 1   | 0   | 3  | 2  | 4  |
|                                                      |                              |                     | PH01000068G0090 | 8   | 6   | 65  | 6   | 2  | 2  | 4  |
|                                                      |                              |                     | PH01000068G0120 | 0   | 0   | 3   | 1   | 0  | 0  | 1  |

|                                                      |                          |                             |                 |    |    |    |    |     |    |    |
|------------------------------------------------------|--------------------------|-----------------------------|-----------------|----|----|----|----|-----|----|----|
| AT2G39810 <sup>82</sup>                              | <i>HOS1</i>              | Gibberellin pathway         | PH01000750G0240 | 22 | 20 | 12 | 11 | 9   | 7  | 6  |
| AT4G02560 <sup>83</sup>                              | <i>LD</i>                | Autonomous pathway          | PH01006816G0010 | 6  | 7  | 6  | 7  | 9   | 7  | 5  |
| AT1G25540 <sup>84</sup>                              | <i>PFT1</i>              | Photoperiod pathway         | PH01001819G0320 | 24 | 26 | 19 | 17 | 14  | 13 | 8  |
|                                                      |                          |                             | PH01002482G0220 | 22 | 24 | 22 | 25 | 19  | 16 | 15 |
| AT1G09570,<br>AT2G18790,<br>AT4G16250,<br>AT4G18130  | <i>PHY</i> <sup>85</sup> | Light-quality pathway       | PH01000013G2230 | 11 | 11 | 4  | 1  | 3   | 1  | 2  |
|                                                      |                          |                             | PH01000013G2240 | 8  | 11 | 9  | 3  | 2   | 3  | 2  |
|                                                      |                          |                             | PH01000222G1330 | 11 | 13 | 4  | 3  | 3   | 3  | 3  |
|                                                      |                          |                             | PH01000606G0390 | 17 | 20 | 2  | 1  | 1   | 2  | 1  |
| AT3G12810 <sup>86</sup>                              | <i>PIE1</i>              | Autonomous pathway          | PH01000672G0430 | 11 | 12 | 4  | 4  | 4   | 4  | 2  |
|                                                      |                          |                             | PH01001540G0210 | 7  | 6  | 2  | 1  | 1   | 1  | 1  |
| AT4G24210 <sup>87</sup>                              | <i>SLY1</i>              | Gibberellin pathway         | PH01000146G1260 | 11 | 10 | 9  | 5  | 7   | 5  | 7  |
|                                                      |                          |                             | PH01000616G0020 | 1  | 1  | 0  | 1  | 2   | 1  | 1  |
| AT2G45660 <sup>88</sup>                              | <i>SOC1</i>              | FPI                         | PH01000759G0450 | 1  | 0  | 2  | 2  | 3   | 1  | 1  |
|                                                      |                          |                             | PH01002152G0120 | 22 | 27 | 5  | 54 | 210 | 9  | 12 |
|                                                      |                          |                             | PH01000059G1270 | 0  | 1  | 0  | 1  | 5   | 1  | 0  |
| AT3G11540 <sup>89</sup>                              | <i>SPY</i>               | Gibberellin pathway         | PH01000299G0650 | 24 | 23 | 25 | 12 | 14  | 18 | 15 |
|                                                      |                          |                             | PH01003018G0160 | 11 | 10 | 9  | 3  | 8   | 7  | 6  |
|                                                      |                          |                             | PH01000836G0140 | 20 | 18 | 17 | 16 | 22  | 23 | 24 |
| AT5G57380 <sup>90</sup> ,<br>AT3G24440 <sup>91</sup> | <i>VIN3, VIN3-L</i>      | Ambient-temperature pathway | PH01001556G0190 | 4  | 5  | 1  | 0  | 1   | 1  | 0  |
|                                                      |                          |                             | PH01000006G3670 | 4  | 4  | 1  | 1  | 1   | 1  | 1  |
|                                                      |                          |                             | PH01000258G0590 | 5  | 5  | 6  | 3  | 6   | 4  | 3  |
|                                                      |                          |                             | PH01000674G0720 | 7  | 7  | 1  | 1  | 0   | 2  | 1  |

† Abbreviations of the genes: *AGAMOUS-LIKE 24 (AGL24)*, *SHORT VEGETATIVE PHASE (SVP)*, *Arabidopsis thaliana CENTRORADIALIS (ATC)*, *BROTHER OF FT AND TFL1 (BFT)*, *TERMINAL FLOWER 1 (TFL1)*, *MYB DOMAIN PROTEIN 33 (ATMYB33)*, *CRYPTOCHROME 1 (CRY1)*, *CRYPTOCHROME 2 (CRY2)*, *EARLY BOLTING IN SHORT DAYS (EBS)*, *EARLY IN SHORT DAYS 4 (ESD4)*, *FLAVIN-BINDING KELCH DOMAIN F BOX PROTEIN 1 (FKF1)*, *FLOWERING LOCUS KH DOMAIN (FLK)*, *FLOWERING PROMOTING FACTOR 1 (FPF1)*, *FRIGIDA (FRI)*, *FLOWERING LOCUS T (FT)*, *FVE (FVE)*, *GA REQUIRING 1 (GA1)*, *GA INSENSITIVE (GAI)*, *REPRESSOR OF GA1-3 (RGA)*, *RGA-LIKE (RGL)*, *GAI AN REVERTANT (Gar)*, *HIGH EXPRESSION OF OSMOTICALLY RESPONSIVE GENES 1 (HOS1)*, *LUMINIDEPENDENS (LD)*, *PHYTOCHROME AND FLOWERING TIME 1 (PFT1)*, *PHYTOCHROME (PHY)*, *PHOTOPERIOD-INDEPENDENT EARLY FLOWERING (PIE)*, *SLEEPY 1 (SLY1)*, *SUPPRESSOR OF OVEREXPRESSION OF CONSTANS 1 (SOC1)*, *SPINDLY (SPY)*, *VERNALIZATION INSENSITIVE 3 (VIN3)*, and *VERNALIZATION INSENSITIVE 3-LIKE 1 (VIN3-L)*.

**Supplementary Table 19 Bamboo floral genes sharing high identities (> 50%) with known rice genes.**

| Bamboo gene ID  | Homologous rice gene | Description of rice gene              | Identities of amino acids | Function                            | Involved pathway†       |
|-----------------|----------------------|---------------------------------------|---------------------------|-------------------------------------|-------------------------|
| PH01000015G0220 | LOC_Os01g04380       | <i>OsHSP17.0</i> <sup>45</sup>        | 0.90                      | Stress tolerance                    | ABA                     |
| PH01000032G1740 | LOC_Os01g58420       | <i>OsERF</i> <sup>44</sup>            | 0.66                      | Drought tolerance                   | ETH                     |
| PH01000053G1650 | LOC_Os11g03300       | <i>OsNAC10</i> <sup>37</sup>          | 0.64                      | Drought tolerance                   | ABA                     |
| PH01000058G1180 | LOC_Os01g72530       | <i>OsCML31</i> <sup>92</sup>          | 0.75                      | Signal transduction                 | Ca <sup>2+</sup> sensor |
| PH01000068G0660 | LOC_Os07g44330       | <i>OsPDK1</i> <sup>93</sup>           | 0.92                      | Signal transduction                 | GA                      |
| PH01000074G0590 | LOC_Os02g44235       | <i>OsTPP1</i> <sup>94</sup>           | 0.51                      | Stress tolerance                    | ABA                     |
| PH01000081G0140 | LOC_Os03g06630       | <i>OsHSF7</i> <sup>46</sup>           | 0.82                      | Stress tolerance                    |                         |
| PH01000091G0440 | LOC_Os03g26870       | <i>SRWD3</i> <sup>39</sup>            | 0.80                      | Salinity tolerance                  |                         |
| PH01000099G1710 | LOC_Os01g42860       | <i>OCPI1</i> <sup>95</sup>            | 0.66                      | Drought tolerance                   |                         |
| PH01000111G0850 | LOC_Os01g66120       | <i>OsNAC6 ; SNAC2</i> <sup>96</sup>   | 0.82                      | Stress tolerance                    | ABA                     |
| PH01000113G0300 | LOC_Os03g07360       | <i>OsDof12</i> <sup>23,24</sup>       | 0.80                      | Regulator of FMI                    | Flowering               |
| PH01000122G1000 | LOC_Os03g60080       | <i>SNAC1</i> <sup>38</sup>            | 0.70                      | Drought tolerance                   |                         |
| PH01000154G1240 | LOC_Os03g16040       | <i>OsHSP17.7</i> <sup>41</sup>        | 0.54                      | Drought and heat stress tolerance   |                         |
| PH01000162G1010 | LOC_Os03g44710       | <i>OsYABBY2; OsYAB2</i> <sup>40</sup> | 0.71                      | FMI                                 |                         |
| PH01000173G1010 | LOC_Os02g52780       | <i>OsZIP23</i> <sup>35</sup>          | 0.59                      | Drought and salinity tolerance      | ABA                     |
| PH01000174G0590 | LOC_Os07g08140       | <i>OsHsfA2b</i> <sup>97</sup>         | 0.62                      | Heat stress tolerance               |                         |
| PH01000192G1330 | LOC_Os04g41540       | <i>OsCML22</i> <sup>92</sup>          | 0.54                      | Signal transduction                 | Ca <sup>2+</sup> sensor |
| PH01000194G0800 | LOC_Os10g28340       | <i>OsHsfA2c</i> <sup>47</sup>         | 0.80                      | Heat and oxidative stress tolerance |                         |
| PH01000208G0690 | LOC_Os03g06630       | <i>OsHSF7</i> <sup>46</sup>           | 0.78                      | Heat stress tolerance               |                         |
| PH01000222G1190 | LOC_Os03g54160       | <i>OsMADS14</i>                       | 0.69                      | FMI                                 | Flowering               |
| PH01000242G0910 | LOC_Os05g49420       | <i>OsZIP45</i> <sup>36</sup>          | 0.78                      | Reproductive development and stress | ABA                     |

|                 |                |                                                    |      |                                     |                         |
|-----------------|----------------|----------------------------------------------------|------|-------------------------------------|-------------------------|
| PH01000280G1220 | LOC_Os02g34560 | <i>SRT-5</i> <sup>98</sup>                         | 0.61 | tolerance                           |                         |
| PH01000284G0720 | LOC_Os05g44340 | <i>OsClpB-cyt</i> ;<br><i>HSP100</i> <sup>47</sup> | 0.87 | Hydrolysis of sucrose               |                         |
| PH01000286G0770 | LOC_Os02g56460 | <i>OsCCR1</i> <sup>99</sup>                        | 0.57 | Defense and cell wall biosynthesis  | Lignin biosynthesis     |
| PH01000298G0570 | LOC_Os05g48930 | <i>OsGRX17</i> <sup>100</sup>                      | 0.57 | Glutaredoxin                        |                         |
| PH01000306G0610 | LOC_Os03g54160 | <i>OsMADS14</i>                                    | 0.57 | FMI                                 | Flowering               |
| PH01000309G1110 | LOC_Os10g36650 | <i>OsActin</i> <sup>101</sup>                      | 0.93 | Salinity tolerance                  | ABA                     |
| PH01000314G0470 | LOC_Os08g43334 | <i>OsHsfB2b</i> <sup>97</sup>                      | 0.54 | Heat and oxidative stress tolerance |                         |
| PH01000317G0080 | LOC_Os01g66030 | <i>OsMADS2</i>                                     | 0.92 | FMI                                 | Flowering               |
| PH01000344G0730 | LOC_Os03g04680 | <i>OsCYP96B4</i> <sup>102</sup>                    | 0.74 | Cytochrome P450                     | Lipid metabolism        |
| PH01000356G0210 | LOC_Os10g33250 | <i>Wda1</i> <sup>103</sup>                         | 0.53 | Pollen Development                  |                         |
| PH01000416G0840 | LOC_Os03g22120 | <i>SUS4</i> <sup>104</sup>                         | 0.95 | Sucrose synthase                    | Sugar metabolism        |
| PH01000437G0190 | LOC_Os02g52780 | <i>OsZIP23</i> <sup>35</sup>                       | 0.59 | Salinity and drought tolerance      | ABA                     |
| PH01000491G0570 | LOC_Os01g09620 | <i>OsDOS</i> <sup>105</sup>                        | 0.72 | Delaying Leaf Senescence            |                         |
| PH01000534G0160 | LOC_Os11g02240 | <i>OsCIPK15</i> <sup>42</sup>                      | 0.51 | Signal transduction                 | Ca <sup>2+</sup> sensor |
| PH01000546G0830 | LOC_Os10g28340 | <i>OsHsfA2c</i> <sup>47</sup>                      | 0.83 | Heat stress tolerance               |                         |
| PH01000548G0440 | LOC_Os11g35710 | <i>OsOSC11</i> ; <i>OsIAS1</i>                     | 0.78 | Isoarborinol synthase and defense   |                         |
| PH01000573G0640 | LOC_Os04g52090 | <i>OsAP2-39</i> <sup>44</sup>                      | 0.53 | Drought tolerance                   | ABA/GA                  |
| PH01000595G0160 | LOC_Os05g04700 | <i>OsLti6b</i> <sup>106</sup>                      | 0.54 | Low temperature stress tolerance    | ABA                     |
| PH01000606G0250 | LOC_Os03g54160 | <i>OsMADS14</i>                                    | 0.66 | FMI                                 | Flowering               |
| PH01000639G0270 | LOC_Os03g16860 | <i>OsHSP71.1</i> <sup>45</sup>                     | 0.57 | Stress tolerance                    | ABA                     |
| PH01000654G0080 | LOC_Os03g31300 | <i>OsClpB-c</i> <sup>107</sup>                     | 0.73 | Stress tolerance                    |                         |
| PH01000664G0490 | LOC_Os03g50885 | <i>OsActin</i> <sup>108</sup>                      | 0.88 | Drought tolerance                   | ABA                     |

|                 |                |                                                             |      |                                            |                  |
|-----------------|----------------|-------------------------------------------------------------|------|--------------------------------------------|------------------|
| PH01000794G0630 | LOC_Os01g66120 | <i>OsNAC6</i> ; <i>SNAC2</i> <sup>96</sup>                  | 0.73 | Stress tolerance                           | ABA              |
| PH01000845G0420 | LOC_Os04g59440 | <i>psbS2</i> <sup>109</sup>                                 | 0.67 | Absorbed Light Energy                      | PHOTOSYSTEM      |
| PH01000877G0160 | LOC_Os08g01330 | <i>OsSWN3</i> <sup>110</sup>                                | 0.52 | Secondary Wall Biosynthesis                |                  |
| PH01000906G0020 | LOC_Os01g08860 | <i>Oshsp18.0-CIF</i> <sup>43</sup>                          | 0.67 | Stress tolerance                           |                  |
| PH01000967G0270 | LOC_Os03g14180 | <i>Oshsp26</i> <sup>44</sup>                                | 0.51 | Heat and oxidative stress tolerance        |                  |
| PH01000974G0590 | LOC_Os03g16860 | <i>OsHSP71.1</i> <sup>45</sup>                              | 0.90 | Stress tolerance                           | ABA              |
| PH01001038G0420 | LOC_Os03g60560 | <i>ZFP182</i> <sup>111</sup>                                | 0.65 | Salinity and drought tolerance             |                  |
| PH01001109G0400 | LOC_Os03g16860 | <i>OsHSP71.1</i> <sup>45</sup>                              | 0.66 | Stress tolerance                           | ABA              |
| PH01001115G0640 | LOC_Os03g16040 | <i>OsHSP17.7</i> <sup>41</sup>                              | 0.80 | Drought and heat stress tolerance          |                  |
| PH01001131G0040 | LOC_Os01g08860 | <i>Oshsp18.0-CIF</i> <sup>43</sup>                          | 0.71 | Stress tolerance                           |                  |
| PH01001298G0250 | LOC_Os07g08840 | <i>OsTrx23, OsTRXh1</i> <sup>112</sup>                      | 0.64 | Oxidative stress tolerance                 | ABA              |
| PH01001464G0430 | LOC_Os02g28980 | <i>rFKBP75</i> <sup>113</sup>                               | 0.79 | heat stress tolerance and seed development |                  |
| PH01001546G0030 | LOC_Os07g08840 | <i>OsTrx23, OsTRXh1</i> <sup>112</sup>                      | 0.74 | Oxidative stress tolerance                 | ABA              |
| PH01001726G0230 | LOC_Os05g44340 | <i>OsClpB-cyt</i> ;<br><i>HSP100</i> <sup>47</sup>          | 0.92 | Heat stress tolerance                      |                  |
| PH01001843G0210 | LOC_Os03g60080 | <i>SNAC1</i> <sup>38</sup>                                  | 0.50 | Drought tolerance                          |                  |
| PH01001888G0390 | LOC_Os01g71670 | <i>OsGLN2</i> <sup>114</sup>                                | 0.53 | Rice endo-1,3- $\beta$ -glucanase          | ABA/GA           |
| PH01001952G0190 | LOC_Os03g11614 | <i>OsMADS1</i> <sup>115</sup> ; <i>LHS1</i> ;<br><i>AFO</i> | 0.54 | FMI                                        | Flowering        |
| PH01002127G0260 | LOC_Os01g10504 | <i>OSMADS3</i> <sup>116</sup>                               | 0.79 | FMI                                        | Flowering        |
| PH01002642G0160 | LOC_Os02g28980 | <i>rFKBP75</i> <sup>113</sup>                               | 0.55 | heat stress tolerance and seed development |                  |
| PH01003526G0090 | LOC_Os03g26870 | <i>SRWD5</i> <sup>39</sup>                                  | 0.73 | Salinity tolerance                         |                  |
| PH01003638G0080 | LOC_Os04g59550 | <i>OsUGT1</i> <sup>117</sup>                                | 0.83 | Sugar transporters                         | Sugar metabolism |



|                 |                |                                    |      |                                   |     |
|-----------------|----------------|------------------------------------|------|-----------------------------------|-----|
| PH01003771G0070 | LOC_Os01g04380 | <i>OsHSP17.0</i> <sup>41</sup>     | 0.89 | Drought and heat stress tolerance | ABA |
| PH01004006G0090 | LOC_Os11g03300 | <i>OsNAC10</i> <sup>37</sup>       | 0.53 | Drought tolerance                 | ABA |
| PH01005579G0050 | LOC_Os03g49380 | <i>OsLOX1</i> <sup>118</sup>       | 0.55 | Stress tolerance                  | JA  |
| PH01005903G0030 | LOC_Os02g08230 | <i>OsGL1-2</i> <sup>119</sup>      | 0.82 | Drought tolerance                 |     |
| PH01006818G0010 | LOC_Os10g33250 | <i>Wda1</i> <sup>103</sup>         | 0.64 | Pollen development                |     |
| PH01172955G0010 | LOC_Os01g08860 | <i>Oshsp18.0-CII</i> <sup>43</sup> | 0.84 | Stress tolerance                  |     |

---

† Abbreviation of the pathways: Floral pathways of FMI or FPI (Flowering), abscisic acid pathway (ABA), Gibberellin pathway (GA), ethylene-responsive pathway (ETH), jasmonic acid pathway (JA).
